# Supplementary material for: MicroRNA-218 instructs proper assembly of hippocampal networks
Source: eLife. 2023 Oct 20;12:e82729. doi: 10.7554/eLife.82729 (PMC10637775; doi:10.7554/eLife.82729)
Supplement: Supplementary file 1. — (1 A) Differential expression results (edgeR) from RNA-seq of dorsal hippocampi of P8 mice injected with a.218 vs a.Ctrl LNAs at P2. (1B) Differential expression results (edgeR) from RNA-seq of P15 Mir218-1-/-; Mir218-2+/- vs wild-type mice. (1 C) Genes enriched in P8 VGluT2 +neurons from dorsal hippocampus, generated by differential expression comparison to genes enriched in P8 dorsal hippocampal VGAT +neurons (1D). [file elife-82729-supp1.xlsx]

## Sheet: 1A a.218 vs a.Ctrl
	logFC	logCPM	LR	PValue	FDR	m218_ts	m218_chiBC5		Legend
Ttr	1.68208	9.51213	2.04446	0.152761	0.999911	0	0		logFC	log2 fold-change (VGluT2+ cells compared to VGAT+ cells)
Htr2c	1.09184	4.38103	29.2234	6.4496e-08	0.000187796	0	0		logCPM	log2 counts per million
Plagl1	1.0423	2.73082	12.022	0.000525766	0.157015	0	0		LR	likelihood ratio
Enpp2	0.959239	5.66571	7.86054	0.00505252	0.507299	0	0		Pvalue	Unadjusted p-value
Pcp4l1	0.857817	3.32122	6.92653	0.00849264	0.626036	0	0		FDR	FDR corrected p-value
Angptl2	0.836625	3.93408	15.5401	8.07733e-05	0.0410653	0	0		m218_ts	Predicted miR-218 target (from TargetScan)
Peg10	0.824087	3.23302	9.70613	0.00183654	0.297086	0	0		m218_chiBC5	miR-218 target from HITS-CLIP
Col6a3	0.811214	4.28709	15.0737	0.000103394	0.0501761	0	0
Lars2	0.794285	5.86743	16.0634	6.12553e-05	0.0410653	0	0
Epha8	0.756278	3.74788	12.4556	0.000416749	0.147087	ts_m218	0
Zfhx4	0.743751	3.05446	7.62496	0.00575661	0.543198	0	0
Galnt13	0.742879	3.71852	10.7066	0.00106752	0.214368	ts_m218	0
Zfp40	0.710332	3.2283	7.93903	0.00483798	0.507299	0	0
Cab39l	0.682174	4.7689	15.5326	8.1094e-05	0.0410653	0	0
Fbn1	0.676377	4.85856	15.8592	6.82338e-05	0.0410653	0	0
Esf1	0.644842	2.73889	4.79652	0.0285173	0.94973	0	0
Samd12	0.631454	3.15209	5.98962	0.0143903	0.775946	ts_m218	0
Trpm3	0.631246	5.45928	5.20239	0.0225559	0.893567	ts_m218	0
Adamts6	0.621231	3.22626	6.04042	0.0139819	0.761889	0	0
Nfat5	0.608883	5.24034	11.3563	0.000751933	0.186335	0	0
Frmd8	0.605636	4.47663	12.147	0.000491678	0.157015	0	0
Aldh9a1	0.600063	4.03381	9.21408	0.00240161	0.36701	0	0
Tm4sf1	0.597789	4.72258	11.6153	0.000654125	0.175069	0	0
Mest	0.595762	5.09857	11.4464	0.000716345	0.181375	0	0
Sorcs1	0.577793	3.37584	5.50336	0.0189799	0.854602	ts_m218	0
Myo1e	0.575417	3.58382	6.64263	0.00995668	0.651491	0	0
Pitpnm3	0.572406	4.00499	7.2869	0.00694592	0.582008	0	0
Sox1	0.569578	4.46327	8.9963	0.00270527	0.389481	0	0
Ddr2	0.564919	3.30749	5.1587	0.0231302	0.910126	0	0
Hist1h3g	0.56339	3.02949	4.40398	0.0358552	0.991748	0	0
Cpne3	0.56192	4.71392	11.4998	0.00069605	0.180153	0	0
Sox9	0.546332	4.51493	9.99671	0.00156821	0.27261	0	0
Pcdhga4	0.542018	2.91864	3.76783	0.0522474	0.999911	0	0
Brpf3	0.540473	3.71233	6.3034	0.0120507	0.726907	ts_m218	0
Ppig	0.537663	4.61817	10.1334	0.00145606	0.256951	ts_m218	0
Cd44	0.537096	3.92906	7.12296	0.00761029	0.594879	0	0
Vasn	0.530491	3.38923	5.00185	0.0253203	0.942189	0	0
Scn9a	0.507057	2.94144	3.2861	0.069869	0.999911	0	0
Ccdc39	0.506683	3.4999	4.75985	0.0291311	0.94973	0	0
Tmem163	0.503245	2.88459	3.20562	0.0733855	0.999911	ts_m218	0
Hcn4	0.49924	2.8242	3.08391	0.0790703	0.999911	ts_m218	0
Parva	0.489087	5.55645	13.4835	0.000240676	0.0934383	0	0
Mdga1	0.485061	6.97789	16.9671	3.80335e-05	0.0340751	ts_m218	0
Sdk1	0.484934	4.29597	6.38728	0.0114941	0.712086	0	0
Uba52	0.48416	2.89632	3.03738	0.0813673	0.999911	0	0
Ubqln2	0.484031	5.96821	13.3589	0.000257193	0.0966298	ts_m218	0
Raver1	0.477496	4.19396	6.27304	0.0122589	0.7322	0	0
Fut11	0.475452	4.24795	6.14301	0.0131932	0.756954	0	0
Hist1h2ab	0.474829	3.2975	3.73208	0.0533769	0.999911	0	0
Kcnh2	0.473806	3.50693	3.64195	0.0563409	0.999911	0	0
Trappc6a	0.472219	3.5212	4.33413	0.0373554	0.999911	0	0
Rmnd1	0.470832	3.75471	4.91866	0.026568	0.946293	0	0
Scand1	0.46712	5.32957	11.0991	0.000863704	0.198959	0	0
Cdkn1a	0.466542	2.78638	2.51986	0.112421	0.999911	0	0
Slc9a1	0.46584	3.93833	5.26892	0.0217095	0.880064	0	0
Prr12	0.463624	3.10586	3.11169	0.0777325	0.999911	0	0
Pigq	0.456726	5.37787	9.96781	0.00159301	0.27285	0	0
Dpm1	0.455501	2.99652	2.87747	0.089827	0.999911	0	0
Rab2b	0.450465	3.36119	3.45239	0.0631604	0.999911	0	0
Rassf8	0.449924	3.80946	4.31232	0.0378373	0.999911	0	0
Zxdb	0.449183	3.86226	4.50445	0.0338067	0.971461	0	0
Sfrp1	0.444385	3.5441	2.97475	0.084573	0.999911	0	0
Hist1h2bg	0.441343	3.85719	3.62921	0.0567737	0.999911	0	0
Itga3	0.439373	4.24747	4.92764	0.0264304	0.944279	0	0
Alms1	0.438538	4.27899	5.78435	0.0161695	0.787884	0	0
Mki67	0.437793	3.9487	4.64453	0.0311527	0.949833	0	0
Trim62	0.421197	3.20873	2.83694	0.0921196	0.999911	0	0
Pdpn	0.420925	4.31451	3.12082	0.0772981	0.999911	0	0
Gria4	0.420798	5.40958	8.73259	0.00312572	0.416431	ts_m218	0
Hist1h4b	0.414338	2.91023	2.22131	0.136117	0.999911	0	0
Hic2	0.412089	2.78753	2.06453	0.150761	0.999911	ts_m218	0
Acan	0.411413	4.28934	4.52374	0.0334277	0.971461	0	0
Grb10	0.408123	5.26545	7.95178	0.00480401	0.507299	0	0
Bcl2l11	0.407202	3.15749	2.55724	0.10979	0.999911	0	0
Sfmbt1	0.406705	4.44351	5.34234	0.0208135	0.879783	ts_m218	0
Nutf2	0.403703	4.03057	4.23589	0.0395779	0.999911	0	0
Olfm3	0.403059	3.85548	3.70667	0.0541954	0.999911	ts_m218	0
Zfp800	0.400407	3.04546	2.29454	0.12983	0.999911	0	0
Elmo1	0.395389	4.73801	5.9524	0.0146973	0.780802	ts_m218	0
Atr	0.395283	4.72972	6.03211	0.014048	0.761889	0	0
Fem1c	0.393824	4.502	4.38449	0.0362674	0.996241	0	0
Pag1	0.392932	4.83277	6.18096	0.0129132	0.74826	ts_m218	0
Krtcap2	0.392506	4.51093	4.6709	0.0306778	0.94973	0	0
Fgfr2	0.39197	5.51743	7.59231	0.00586178	0.543198	ts_m218	0
Metrn	0.391493	3.05401	2.07802	0.149434	0.999911	0	0
Pex1	0.390401	4.25949	4.55963	0.0327341	0.971461	0	0
Col12a1	0.389796	4.90587	4.45372	0.0348254	0.975679	0	0
Bcl9	0.387624	4.84291	4.68951	0.0303474	0.94973	ts_m218	0
Hist1h3c	0.387431	4.69152	4.7776	0.0288322	0.94973	0	0
Pcdhgb6	0.383765	3.95457	3.53743	0.0599985	0.999911	0	0
Ccnd2	0.383508	6.86948	12.7606	0.000354001	0.128845	0	0
Stk35	0.383142	4.37779	4.70876	0.0300093	0.94973	0	0
Inpp4b	0.381795	3.20037	2.32241	0.127523	0.999911	0	0
Cited2	0.380585	3.70145	3.04877	0.0807985	0.999911	0	0
Stom	0.379803	4.53786	4.85954	0.0274937	0.94973	0	0
Frem2	0.377353	4.76223	5.35043	0.0207172	0.879783	0	0
Mt1	0.37703	4.09802	3.42218	0.064326	0.999911	0	0
Pik3c2a	0.376962	5.17808	5.79748	0.0160491	0.787884	ts_m218	0
Gatc	0.374953	3.91197	3.38504	0.0657905	0.999911	0	0
Wwtr1	0.374555	5.17875	4.47465	0.0344012	0.971461	0	0
Igfbp2	0.372153	7.04489	3.94671	0.0469632	0.999911	0	0
Slbp	0.371844	4.76385	5.3988	0.0201506	0.866031	0	0
Hectd2	0.370578	4.75505	4.27335	0.0387146	0.999911	ts_m218	0
Foxo1	0.369465	3.73497	2.70373	0.100114	0.999911	0	0
Sec24a	0.369008	4.57865	4.0401	0.0444312	0.999911	0	0
Zfp711	0.368137	3.63861	2.55382	0.110028	0.999911	0	0
Ankrd26	0.366728	3.10482	1.99725	0.157584	0.999911	0	0
Slitrk4	0.366504	4.77873	4.69873	0.0301849	0.94973	0	0
Rgs3	0.366312	3.94851	3.37711	0.0661077	0.999911	0	0
Notch2	0.366218	6.39325	10.599	0.00113146	0.217263	0	0
Rgs17	0.366031	5.04051	4.71225	0.0299485	0.94973	ts_m218	0
Sh3pxd2a	0.365668	5.18794	5.79955	0.0160302	0.787884	0	0
Zfp90	0.363476	2.75321	1.47596	0.224407	0.999911	0	0
Slit1	0.360106	7.11439	10.5951	0.00113388	0.217263	0	0
Zfp804a	0.360046	2.72096	1.49019	0.222187	0.999911	0	0
Lrch2	0.359084	4.22162	3.77571	0.0520017	0.999911	0	0
Sncb	0.358326	4.75182	3.89584	0.0484058	0.999911	ts_m218	0
Twistnb	0.355515	2.85531	1.58899	0.207471	0.999911	0	0
Nipbl	0.355088	4.68193	4.28638	0.0384188	0.999911	0	0
Chka	0.354108	5.63577	6.37104	0.0115997	0.714827	0	0
Zfp143	0.350792	3.18296	1.9449	0.163137	0.999911	0	0
Fnbp1	0.350778	4.69966	3.21829	0.0728195	0.999911	0	0
Cit	0.350593	4.32916	3.30814	0.0689374	0.999911	0	0
Col6a1	0.349756	4.44612	3.933	0.0473474	0.999911	0	0
Usp54	0.345988	4.79737	4.69843	0.0301903	0.94973	0	0
Slc7a2	0.345868	4.84136	4.6865	0.0304006	0.94973	0	0
Yap1	0.345201	3.98219	3.06297	0.0800951	0.999911	0	0
Cxxc5	0.344746	5.10796	4.93741	0.0262814	0.944279	0	0
Il1rap	0.344485	4.53614	4.11326	0.0425482	0.999911	ts_m218	0
Akap5	0.344402	4.63828	4.22109	0.0399244	0.999911	0	0
Myo10	0.343262	5.86461	5.94626	0.0147486	0.780802	0	0
Zdhhc21	0.339603	6.22793	6.76477	0.0092975	0.63669	0	0
Col23a1	0.336575	3.6882	2.41085	0.120497	0.999911	0	0
N4bp2	0.335975	4.52308	2.61316	0.10598	0.999911	0	0
Zdhhc20	0.335298	4.89874	4.66694	0.0307487	0.94973	0	0
Fbxo30	0.334636	3.49555	2.07686	0.149548	0.999911	0	0
Zfp384	0.333408	3.86349	2.53468	0.11137	0.999911	0	0
Fut9	0.332842	5.83104	6.29784	0.0120885	0.726907	ts_m218	0
Glb1	0.332138	4.74033	2.73015	0.0984699	0.999911	0	0
Tmem97	0.329108	4.02415	2.75113	0.0971858	0.999911	0	0
Maf	0.328734	4.61953	3.93775	0.0472138	0.999911	0	0
Gabrg1	0.328685	4.16838	2.96131	0.0852788	0.999911	0	0
Syt9	0.327471	3.22559	1.70756	0.191302	0.999911	0	0
Cdh22	0.327134	3.0478	1.48027	0.223732	0.999911	0	0
Myo7a	0.325695	5.80331	6.84509	0.0088885	0.629945	0	0
Ddit4l	0.325646	3.61694	1.98726	0.158627	0.999911	0	0
Bak1	0.325334	3.72168	2.22357	0.135918	0.999911	0	0
Aspscr1	0.325191	5.13929	3.9796	0.0460545	0.999911	0	0
Hist1h1e	0.325061	5.56095	2.82141	0.0930146	0.999911	0	0
Pde1c	0.324171	3.4666	1.87313	0.171117	0.999911	0	0
R3hdm2	0.323466	5.16275	4.79185	0.0285946	0.94973	0	0
Myadm	0.323447	3.98388	2.65601	0.103159	0.999911	0	0
Herpud2	0.323333	4.12242	2.71621	0.0993335	0.999911	ts_m218	0
Apod	0.322521	3.87733	2.3257	0.127253	0.999911	0	0
Tppp3	0.320643	4.96502	3.24085	0.0718233	0.999911	0	0
Npat	0.318937	3.75894	2.2932	0.129942	0.999911	0	0
Rfx1	0.318836	3.43444	1.87257	0.171181	0.999911	0	0
Trps1	0.318646	6.61077	5.89958	0.0151445	0.787884	0	0
Zfp292	0.31861	5.63973	4.71226	0.0299483	0.94973	0	0
Klhdc8b	0.316752	4.86158	2.74173	0.0977591	0.999911	0	0
Sesn2	0.315995	3.69083	2.13396	0.144068	0.999911	0	0
Pex2	0.315732	5.10565	4.1683	0.0411871	0.999911	0	0
Zkscan2	0.313764	4.40922	2.89831	0.0886723	0.999911	0	0
Pcdhb20	0.31267	3.56125	1.90772	0.167216	0.999911	0	0
Slc31a1	0.311676	4.91087	3.3104	0.0688428	0.999911	0	0
Dync2h1	0.311645	5.84568	5.83289	0.0157292	0.787884	0	0
Zmym5	0.311249	3.7507	1.86436	0.172122	0.999911	0	0
Zfp160	0.311166	3.15276	1.43831	0.230413	0.999911	0	0
Zfhx2	0.310872	4.31286	2.94949	0.0859047	0.999911	ts_m218	0
Syn3	0.310284	4.02605	2.41753	0.119984	0.999911	0	0
Cd164	0.31017	4.83923	3.90315	0.0481956	0.999911	0	0
Rcor1	0.310127	4.85863	3.90363	0.048182	0.999911	ts_m218	0
Tm6sf1	0.310121	3.10474	1.40646	0.235645	0.999911	0	0
Csf1	0.309827	3.58206	1.94471	0.163158	0.999911	0	0
Sac3d1	0.309605	4.27423	2.84482	0.091669	0.999911	0	0
Tmed2	0.309184	4.67389	3.48714	0.0618472	0.999911	0	0
Chpt1	0.308922	4.45012	2.91676	0.0876638	0.999911	0	0
Tceal5	0.308513	3.06564	1.3986	0.236958	0.999911	0	0
Ptgfrn	0.308418	5.7446	3.5617	0.0591273	0.999911	0	0
Cnnm4	0.308309	4.83087	3.76488	0.0523395	0.999911	0	0
Gabra2	0.30793	6.1006	5.49439	0.0190776	0.854602	0	0
Frat1	0.307658	2.76812	1.12848	0.288099	0.999911	0	0
Camk2d	0.307383	5.95132	4.53188	0.033269	0.971461	0	0
Crhr1	0.306336	4.46343	3.14111	0.0763419	0.999911	0	0
Nubp1	0.306154	4.1607	2.58374	0.107966	0.999911	0	0
Tspan31	0.305673	5.2509	3.23405	0.0721223	0.999911	0	0
Pcdhga7	0.305648	3.11106	1.39594	0.237404	0.999911	0	0
Mon1a	0.305061	4.16036	2.5066	0.11337	0.999911	0	0
Klhl20	0.304894	4.87467	3.70621	0.0542105	0.999911	0	0
Atxn2	0.304429	5.6773	3.4292	0.0640532	0.999911	ts_m218	0
Itgav	0.301887	5.8206	4.49353	0.0340233	0.971461	0	0
Nktr	0.301504	6.30362	3.77291	0.0520888	0.999911	0	0
Ttc21b	0.300282	4.38646	2.55389	0.110023	0.999911	0	0
Ezr	0.30018	6.50289	4.20228	0.0403696	0.999911	0	0
2310011J03Rik	0.299564	5.15138	3.71197	0.0540238	0.999911	0	0
Qsox2	0.299292	5.04685	3.8442	0.0499182	0.999911	0	0
Ssfa2	0.298484	4.48006	2.94486	0.0861511	0.999911	0	0
1600012H06Rik	0.298383	4.17401	2.45229	0.117354	0.999911	ts_m218	0
Ncor2	0.297579	4.62887	2.47052	0.115999	0.999911	0	0
Igfbp3	0.29739	4.61025	3.07236	0.0796339	0.999911	0	0
Golga4	0.296092	5.06879	3.46531	0.0626689	0.999911	0	0
Patl1	0.295883	3.40524	1.51852	0.217843	0.999911	0	0
Ints6	0.295511	4.33552	2.62613	0.105118	0.999911	0	0
Spty2d1	0.294997	4.29517	2.65006	0.103546	0.999911	0	0
Rnf8	0.294615	3.13337	1.32873	0.249032	0.999911	0	0
Camta2	0.294514	5.87675	5.41096	0.0200107	0.866031	0	0
Iscu	0.293937	4.72645	3.0696	0.079769	0.999911	0	0
1110008F13Rik	0.293773	4.70457	3.21848	0.0728113	0.999911	0	0
Ankzf1	0.293538	4.60203	2.91986	0.0874954	0.999911	0	0
Tmem109	0.293386	4.05894	2.28329	0.130774	0.999911	0	0
Nsun5	0.292731	4.00372	2.23571	0.134855	0.999911	0	0
Brcc3	0.292407	4.05841	2.27522	0.131456	0.999911	ts_m218	0
Pde4a	0.291855	4.73176	3.2661	0.0707258	0.999911	0	0
Tfip11	0.290335	4.8067	3.2794	0.0701545	0.999911	0	0
Slc2a1	0.289155	5.90605	5.1095	0.0237952	0.917034	0	0
G6pc3	0.288072	3.5625	1.61834	0.203323	0.999911	0	0
Itm2c	0.287006	8.63293	8.01534	0.00463829	0.50488	ts_m218	0
Ptpn13	0.286563	4.34345	2.58684	0.107755	0.999911	0	0
Nkain3	0.285876	5.14318	3.24787	0.0715165	0.999911	0	0
Abhd14a	0.285435	5.03746	3.40122	0.0651483	0.999911	0	0
Tmem131	0.284499	5.44878	3.74319	0.0530233	0.999911	0	0
Acaa2	0.284323	5.90476	3.58783	0.058204	0.999911	0	0
Syt13	0.283962	7.43919	5.77712	0.0162362	0.787884	ts_m218	0
Jam3	0.283807	4.79365	3.19976	0.073649	0.999911	0	0
Zfp655	0.282997	4.55429	2.64928	0.103597	0.999911	0	0
Exoc8	0.282939	6.39427	4.69429	0.030263	0.94973	0	0
Tmem47	0.280699	5.08231	2.63603	0.104464	0.999911	0	0
Rnf208	0.280662	3.26277	1.30235	0.253785	0.999911	0	0
Vat1	0.280455	6.49358	5.19254	0.022684	0.895594	ts_m218	0
St8sia2	0.280256	4.89852	2.98515	0.0840315	0.999911	0	0
Slc35a3	0.279977	4.46341	2.0611	0.151101	0.999911	0	0
Ccdc85b	0.279864	5.12705	2.65096	0.103488	0.999911	0	0
Krit1	0.27977	5.16193	3.33612	0.0677744	0.999911	0	0
Clic1	0.279482	4.85284	3.00367	0.0830762	0.999911	0	0
Hist1h3b	0.27916	3.74643	1.72269	0.189348	0.999911	0	0
Smo	0.277768	5.18424	2.56015	0.109588	0.999911	0	0
Gabpb1	0.277326	4.16232	2.09813	0.14748	0.999911	0	0
Stau1	0.276847	5.3559	3.50372	0.0612312	0.999911	0	0
Rxra	0.276198	4.50451	2.38676	0.122367	0.999911	0	0
Sema4g	0.276192	4.99535	3.17395	0.0748214	0.999911	0	0
Clic4	0.275858	5.88012	4.97754	0.0256785	0.944279	0	0
Plekhf2	0.275764	4.45338	2.35125	0.125183	0.999911	ts_m218	0
Fbxo2	0.275536	5.00431	2.98152	0.0842203	0.999911	0	0
Sesn3	0.27532	4.54824	2.56202	0.109459	0.999911	ts_m218	0
Ep300	0.27508	5.92591	3.39133	0.0655403	0.999911	0	0
Sgsm1	0.274726	6.1013	4.81276	0.0282497	0.94973	ts_m218	0
Tmem143	0.274364	4.79229	2.98917	0.083823	0.999911	0	0
Pcdha12	0.274306	3.02504	1.00466	0.316185	0.999911	0	bc5_chi_m218
Tsga10	0.27414	3.89926	1.82893	0.176254	0.999911	0	0
Nrd1	0.273642	5.77374	3.99501	0.0456351	0.999911	0	0
Dpp10	0.273214	5.36494	2.06027	0.151183	0.999911	0	0
Lrfn1	0.273158	4.69067	2.80056	0.0942311	0.999911	0	0
Ccdc120	0.272955	3.876	1.77069	0.183297	0.999911	0	0
Slc12a2	0.272601	5.83373	4.40047	0.035929	0.991748	ts_m218	0
Pdgfb	0.27231	5.57578	4.08257	0.0433277	0.999911	0	0
Uhrf1bp1	0.272	5.42987	3.3679	0.0664785	0.999911	0	0
Decr2	0.271112	5.55525	3.35806	0.0668767	0.999911	0	0
Mrpl2	0.27094	5.15856	2.28081	0.130983	0.999911	0	0
Id4	0.270685	5.32331	3.50345	0.0612411	0.999911	0	0
Sulf2	0.27037	7.06569	6.86951	0.00876788	0.629945	ts_m218	0
Adamts1	0.269818	4.76443	2.80423	0.0940159	0.999911	0	0
Pgd	0.26969	4.80291	1.62547	0.20233	0.999911	0	0
Boc	0.269685	4.11688	1.99974	0.157326	0.999911	0	0
Fzr1	0.269593	5.53039	4.08864	0.0431723	0.999911	0	0
Ncoa7	0.269361	4.79361	2.51211	0.112975	0.999911	0	0
Ephx1	0.26896	3.71345	1.30366	0.253545	0.999911	0	0
Sdk2	0.268644	4.47346	2.41354	0.12029	0.999911	0	0
Frs2	0.268643	5.10139	3.19895	0.0736856	0.999911	0	0
Lhfpl3	0.268062	4.13833	1.20051	0.27322	0.999911	0	0
Crtc3	0.266861	3.87139	1.70976	0.191016	0.999911	ts_m218	0
Zfp28	0.266346	3.77921	1.47532	0.224507	0.999911	0	0
Qpct	0.266302	4.31532	2.06659	0.150558	0.999911	0	0
Rfx5	0.266048	3.79559	1.53519	0.215335	0.999911	0	0
Rhbdd2	0.265249	4.18876	2.03263	0.153954	0.999911	0	0
Aff1	0.264178	3.61086	1.31702	0.251128	0.999911	0	0
Anxa5	0.264041	5.05023	3.11239	0.0776986	0.999911	0	0
Fn1	0.263708	5.96361	2.88583	0.089362	0.999911	0	0
Plxnc1	0.263707	5.99206	4.52392	0.0334241	0.971461	ts_m218	0
Snx13	0.263472	5.40744	2.66869	0.102341	0.999911	ts_m218	0
B3galt1	0.2633	4.8353	2.68544	0.101269	0.999911	0	0
Gja1	0.263223	6.45584	3.52991	0.0602711	0.999911	ts_m218	bc5_chi_m218
Vcan	0.262901	5.71236	2.59413	0.10726	0.999911	0	0
Zcchc7	0.26287	4.74262	1.82265	0.176998	0.999911	0	0
Arhgap5	0.262249	5.26209	2.94966	0.0858955	0.999911	ts_m218	0
Llgl1	0.261005	5.45705	3.32986	0.0680327	0.999911	0	0
Pcdh10	0.260954	6.43134	3.95244	0.0468035	0.999911	0	0
Mppe1	0.260821	2.81801	0.845365	0.357867	0.999911	0	0
L3mbtl3	0.25993	4.86376	2.43472	0.118675	0.999911	ts_m218	0
Lrrc47	0.25989	4.74323	2.32972	0.126925	0.999911	0	0
Zfp606	0.259283	4.38883	2.1409	0.143417	0.999911	0	0
Smpdl3a	0.259196	4.86177	2.71837	0.0991994	0.999911	0	0
Tcf12	0.258888	5.86123	3.93373	0.0473268	0.999911	ts_m218	0
Edc3	0.258804	4.4165	2.06708	0.150509	0.999911	0	0
Pik3ip1	0.258794	5.06947	2.90496	0.0883074	0.999911	0	0
Prdm10	0.258793	3.78927	1.50596	0.219757	0.999911	0	0
Top2a	0.258776	5.36915	2.9182	0.0875855	0.999911	0	0
Thbs1	0.25873	4.18096	1.78353	0.181717	0.999911	0	0
Mmp16	0.25849	5.51481	3.29523	0.0694812	0.999911	0	0
Mrpl17	0.258367	5.27261	2.47166	0.115915	0.999911	0	0
D1Ertd622e	0.258204	5.06225	2.64126	0.104121	0.999911	ts_m218	0
Abhd10	0.25779	3.96479	1.67413	0.195706	0.999911	0	0
Ppfibp1	0.257626	4.6858	2.51061	0.113082	0.999911	0	0
Spsb3	0.257009	3.39638	1.04215	0.307321	0.999911	0	0
Dmxl1	0.25611	6.23927	3.6716	0.0553471	0.999911	0	0
Ankrd24	0.255773	4.20951	1.84551	0.174307	0.999911	0	0
Fus	0.255748	4.90718	2.05775	0.151433	0.999911	0	0
Lcorl	0.255684	4.69537	1.70524	0.191604	0.999911	ts_m218	0
Schip1	0.25559	4.24973	1.93872	0.163808	0.999911	0	0
Yipf6	0.255421	5.62287	3.5612	0.0591451	0.999911	0	0
Ezh1	0.254594	5.01276	2.70719	0.0998966	0.999911	0	0
Plcxd3	0.25443	3.84473	1.44343	0.229585	0.999911	0	0
Atp7a	0.254142	4.03713	1.45577	0.227604	0.999911	0	0
Sos1	0.253631	5.88066	3.0277	0.0818537	0.999911	0	0
Sgpl1	0.253494	5.83851	4.01612	0.0450673	0.999911	0	0
Ccnd1	0.253079	5.4477	3.33882	0.0676632	0.999911	0	0
Clip4	0.253062	4.92995	2.61665	0.105748	0.999911	0	0
Znhit1	0.252844	4.75174	2.32369	0.127417	0.999911	0	0
Tjp1	0.25264	5.90505	3.3258	0.0682008	0.999911	0	0
Srrm1	0.25246	5.09581	2.95523	0.0856002	0.999911	0	0
Wasl	0.251596	4.77966	2.45562	0.117105	0.999911	ts_m218	0
Mrps23	0.251552	4.91647	2.66665	0.102471	0.999911	0	0
Ccdc88a	0.251041	6.55981	3.5735	0.0587086	0.999911	ts_m218	0
Plekhj1	0.250977	4.55813	1.99666	0.157646	0.999911	0	0
Acvr1c	0.25092	2.90622	0.821247	0.364816	0.999911	0	0
Zfp287	0.25089	3.7882	1.4304	0.231698	0.999911	0	0
Man2a1	0.250866	4.84052	2.22589	0.135715	0.999911	ts_m218	0
Ddr1	0.250098	5.70288	2.26186	0.132595	0.999911	0	0
Bcl9l	0.249717	3.86204	1.44557	0.22924	0.999911	0	0
Acbd6	0.249399	5.09166	2.67475	0.101951	0.999911	0	0
Slc27a1	0.249303	6.28266	4.70649	0.030049	0.94973	0	0
Cspp1	0.249263	5.07995	2.4345	0.118691	0.999911	0	0
Zdhhc9	0.249224	4.70731	2.37961	0.122929	0.999911	0	0
Lzts2	0.247894	4.61985	2.13587	0.143889	0.999911	0	0
Endod1	0.247821	5.69607	3.16175	0.0753825	0.999911	0	0
Glt8d1	0.247632	4.0412	1.54632	0.21368	0.999911	0	0
Ntn1	0.247043	4.17758	1.74739	0.186205	0.999911	0	0
Hs6st2	0.247003	4.73582	2.11489	0.145872	0.999911	0	0
Ash1l	0.246897	6.09267	2.2109	0.137039	0.999911	0	0
Zkscan6	0.246038	5.05309	2.5147	0.112789	0.999911	0	0
Hist1h2bj	0.245806	3.94233	1.35397	0.244585	0.999911	0	0
Map2k3	0.24542	3.12975	0.905614	0.341281	0.999911	0	0
St3gal1	0.245054	2.72911	0.694198	0.40474	0.999911	0	0
Anxa2	0.244993	4.95997	2.51677	0.112641	0.999911	0	0
Eya3	0.244927	4.85157	2.13422	0.144043	0.999911	0	0
Zbtb33	0.244863	4.65486	2.15793	0.141836	0.999911	0	0
Rap2c	0.244573	4.68851	1.81964	0.177356	0.999911	0	0
Serpinh1	0.244402	6.9559	2.97132	0.0847525	0.999911	0	0
Rhof	0.244079	4.93697	2.1563	0.141986	0.999911	0	0
Zbtb46	0.244015	5.25102	2.44924	0.117581	0.999911	0	0
Efhd2	0.243563	4.99807	2.49546	0.114175	0.999911	0	0
Slc35a2	0.243534	4.99648	1.65775	0.197907	0.999911	0	0
Mthfd2	0.242916	3.55456	1.16733	0.27995	0.999911	0	0
Plekha5	0.242678	5.06106	2.3807	0.122842	0.999911	0	0
Scamp3	0.241955	3.79705	1.17356	0.278671	0.999911	0	0
Tmem108	0.241882	3.79	1.3381	0.247369	0.999911	0	0
Sobp	0.241788	5.29144	2.8045	0.094	0.999911	0	0
Wdr41	0.241677	4.88291	2.45099	0.117451	0.999911	0	0
Rnf6	0.24166	4.4182	1.81439	0.177982	0.999911	0	0
Mmp15	0.241564	5.58715	1.924	0.165417	0.999911	0	0
Slain1	0.241521	5.36063	2.70808	0.0998411	0.999911	ts_m218	0
Atm	0.241227	4.9523	1.64431	0.199735	0.999911	0	0
Etfb	0.241213	2.6709	0.651286	0.419653	0.999911	0	0
Cetn2	0.240973	5.059	2.5175	0.112589	0.999911	ts_m218	0
Phf1	0.240423	4.38578	1.83942	0.175019	0.999911	0	0
Rac1	0.239828	5.81093	3.63659	0.0565226	0.999911	0	0
Palm2	0.239447	2.98968	0.802858	0.37024	0.999911	ts_m218	0
Ccdc92	0.239196	3.85189	1.32498	0.2497	0.999911	0	0
Casc3	0.239053	4.766	1.71296	0.190602	0.999911	0	0
Arl6	0.238774	4.22036	1.66766	0.196572	0.999911	0	0
Asb7	0.238751	4.80807	2.04681	0.152525	0.999911	0	0
Tle4	0.23843	6.03627	3.64797	0.0561377	0.999911	0	0
Rpgr	0.237451	4.08255	1.44712	0.228991	0.999911	0	0
Aldh2	0.237398	5.38008	2.83442	0.0922643	0.999911	0	0
Tmem55b	0.237036	4.82259	1.62507	0.202386	0.999911	0	0
Med14	0.237035	5.89733	3.26224	0.0708921	0.999911	0	0
Smarcd3	0.236974	5.63545	2.92223	0.087367	0.999911	0	0
H2afj	0.236963	4.7333	2.06002	0.151208	0.999911	0	0
Setd2	0.23688	5.59022	2.76677	0.0962404	0.999911	0	0
Zcchc11	0.236802	4.52211	1.70052	0.19222	0.999911	0	0
2510009E07Rik	0.236721	5.88077	3.27455	0.0703621	0.999911	ts_m218	0
Chchd10	0.236638	4.65063	2.08579	0.148676	0.999911	0	0
Tubb6	0.236472	3.51739	0.992451	0.319144	0.999911	0	0
Syvn1	0.236031	4.34389	1.51437	0.218473	0.999911	0	0
Chm	0.23597	4.83536	2.07597	0.149635	0.999911	ts_m218	0
Hist1h4i	0.235922	3.27515	0.921109	0.337184	0.999911	0	0
Rps6ka2	0.23583	5.11282	2.45946	0.116819	0.999911	0	0
Rybp	0.235573	3.4167	1.00252	0.316702	0.999911	ts_m218	0
Sc5d	0.234865	5.75496	2.38972	0.122135	0.999911	0	0
Gss	0.23468	3.72682	1.19645	0.274033	0.999911	0	0
Zmiz2	0.234084	5.83254	2.99473	0.0835359	0.999911	ts_m218	0
Yipf2	0.233968	3.8539	1.27703	0.258453	0.999911	0	0
Ube3a	0.233489	7.27818	3.39308	0.0654704	0.999911	ts_m218	0
Plce1	0.232967	4.39875	1.70696	0.19138	0.999911	0	0
Pclo	0.232878	6.89016	2.99125	0.0837153	0.999911	ts_m218	0
Arglu1	0.232868	5.29006	2.70104	0.100283	0.999911	0	0
Yars2	0.232845	3.9352	1.34783	0.245658	0.999911	0	0
Mms19	0.232768	5.76948	2.88203	0.089573	0.999911	0	0
Pom121	0.232662	3.2782	0.778177	0.377699	0.999911	0	0
Timp3	0.232616	5.50394	2.65142	0.103458	0.999911	0	0
Pcyt1a	0.232463	5.96982	3.03076	0.0816997	0.999911	0	0
Acsl4	0.232437	6.18718	3.79811	0.0513106	0.999911	0	0
Sh3d19	0.232311	5.17771	2.61244	0.106028	0.999911	ts_m218	0
Bckdha	0.232124	4.01114	1.3099	0.252413	0.999911	0	0
Cpt1a	0.231982	5.17032	2.45445	0.117192	0.999911	0	0
S1pr3	0.231782	3.99561	1.37437	0.241063	0.999911	0	0
Tspan14	0.231385	5.44779	2.73806	0.0979837	0.999911	0	0
Mapk1ip1l	0.231129	4.89758	2.22508	0.135786	0.999911	0	0
A2m	0.230803	3.57734	1.05161	0.305137	0.999911	0	0
Purg	0.230311	5.15442	2.25509	0.133175	0.999911	0	0
Fgf14	0.229726	4.99657	2.2934	0.129925	0.999911	0	0
Tbc1d7	0.229547	3.97653	1.2375	0.265954	0.999911	0	0
Tle3	0.229176	5.5475	2.91399	0.0878145	0.999911	0	0
Slc30a7	0.228766	5.07037	2.17654	0.140129	0.999911	0	0
Xpr1	0.228665	6.73507	2.14464	0.143069	0.999911	0	0
Klhl25	0.227488	5.68104	2.98791	0.0838884	0.999911	0	0
Ppargc1a	0.227462	4.2555	1.39252	0.237979	0.999911	ts_m218	0
Ptpn23	0.227396	4.72685	1.9768	0.159728	0.999911	0	0
Mfsd1	0.227158	5.5943	3.03918	0.0812771	0.999911	0	0
Hist1h2ai	0.226408	3.15854	0.636226	0.425081	0.999911	0	0
Tjp2	0.226142	5.25648	2.41749	0.119987	0.999911	0	0
Slc38a3	0.226053	6.14033	1.63468	0.201057	0.999911	0	0
Amotl2	0.225797	5.3701	2.69582	0.100612	0.999911	0	0
Lcor	0.225482	4.17086	1.40328	0.236175	0.999911	0	0
2019-03-09	0.224941	5.51695	2.24356	0.134172	0.999911	0	0
Col3a1	0.224468	7.12868	3.24925	0.071456	0.999911	0	0
Gng4	0.224378	6.8287	3.59114	0.0580884	0.999911	0	0
Rfxap	0.224366	5.28669	2.51616	0.112685	0.999911	0	0
Bid	0.224291	5.2148	2.3626	0.124275	0.999911	0	0
Kif21b	0.224282	8.2852	5.09853	0.0239461	0.917034	ts_m218	bc5_chi_m218
Cdc42ep3	0.224008	3.55245	0.996731	0.318103	0.999911	0	0
Mrps27	0.22373	4.17392	1.33603	0.247735	0.999911	0	0
Leng8	0.223671	6.0114	3.34657	0.0673451	0.999911	0	0
Prdx4	0.223559	4.70659	1.91388	0.166533	0.999911	0	0
Klf8	0.223449	4.25277	1.40761	0.235454	0.999911	ts_m218	0
Sh3gl2	0.223351	5.86096	3.23955	0.0718802	0.999911	0	0
Tmem158	0.222076	5.86422	2.95147	0.0857995	0.999911	0	0
Nup214	0.221859	4.84707	1.98577	0.158784	0.999911	0	0
Ids	0.221525	7.50165	5.47498	0.0192905	0.857546	0	0
Itgb8	0.22031	5.50621	1.77537	0.182719	0.999911	0	0
Spock3	0.219834	5.05728	1.52085	0.217491	0.999911	ts_m218	0
Hist1h2ac	0.219829	3.45095	0.887098	0.346265	0.999911	0	0
Lyst	0.219114	6.34906	2.17306	0.140447	0.999911	0	0
Bptf	0.218727	5.90804	1.84464	0.174408	0.999911	0	0
Lypla1	0.218628	4.00005	1.04256	0.307228	0.999911	0	0
Extl3	0.218458	6.92202	3.53879	0.0599491	0.999911	ts_m218	0
Prickle1	0.218367	4.55045	1.46944	0.225433	0.999911	0	0
Unc5d	0.218361	4.76009	1.49354	0.221668	0.999911	0	0
Cenpc1	0.218049	4.09084	1.17798	0.277769	0.999911	0	0
Slc35f5	0.217995	5.06379	2.05837	0.151372	0.999911	0	0
Igfbp5	0.217079	6.18858	2.96325	0.0851767	0.999911	0	0
Kcnh1	0.21704	4.98068	1.96011	0.161502	0.999911	ts_m218	0
Bcorl1	0.217031	4.33445	1.38941	0.238505	0.999911	0	0
Ust	0.216836	5.17043	2.07407	0.149821	0.999911	0	0
Pop1	0.216555	3.98797	1.0586	0.303535	0.999911	0	0
Lasp1	0.216544	6.74603	3.51757	0.0607215	0.999911	ts_m218	0
N4bp2l1	0.216259	3.33658	0.817516	0.365907	0.999911	0	0
Cux1	0.215503	5.77593	2.92714	0.0871016	0.999911	ts_m218	0
Fbxo8	0.215486	4.22895	1.36003	0.243532	0.999911	ts_m218	0
Sec61b	0.215281	5.03743	2.10366	0.146947	0.999911	0	0
Phf13	0.215228	4.16367	1.30154	0.253932	0.999911	0	0
Rps6ka4	0.215207	5.198	1.42584	0.232445	0.999911	0	0
Rnf111	0.214975	5.32341	2.22875	0.135463	0.999911	0	0
Tmed4	0.214062	5.12468	1.96813	0.160646	0.999911	0	0
Rab11fip5	0.214013	6.40714	3.27284	0.0704355	0.999911	0	0
Adamts8	0.213873	3.41042	0.77918	0.377392	0.999911	0	0
Robo2	0.213742	7.18216	3.5022	0.0612874	0.999911	ts_m218	0
Tiparp	0.213615	4.52889	1.55992	0.211677	0.999911	0	0
Wdr74	0.213135	4.97141	1.56465	0.210986	0.999911	0	0
Atp1b2	0.213102	5.85762	2.60822	0.106311	0.999911	0	0
Ptprk	0.213016	5.99678	3.15847	0.0755341	0.999911	ts_m218	0
Cpsf4	0.212719	4.95572	1.86651	0.171875	0.999911	0	0
Scube1	0.212679	3.55069	0.885052	0.346822	0.999911	0	0
Srrm2	0.21267	6.93385	1.91541	0.166364	0.999911	0	0
Alg2	0.212336	7.30463	3.53139	0.0602171	0.999911	0	0
Zmiz1	0.21219	5.39524	1.87236	0.171205	0.999911	ts_m218	0
Ankrd42	0.211722	4.22179	1.30797	0.252762	0.999911	0	0
Carhsp1	0.211523	5.96001	2.29587	0.129719	0.999911	0	0
Slc38a1	0.21139	6.89335	4.09459	0.0430208	0.999911	0	0
Actn4	0.21105	5.50619	2.03626	0.153587	0.999911	0	0
Wasf1	0.210894	6.5624	3.75091	0.0527788	0.999911	0	0
Bcl10	0.210874	4.4808	1.4805	0.223696	0.999911	0	0
Cyb561d2	0.210793	4.7138	1.62414	0.202515	0.999911	0	0
Kndc1	0.210686	5.77257	2.68877	0.101058	0.999911	0	0
Grm1	0.210463	5.44818	2.42934	0.119083	0.999911	ts_m218	0
Lrrc8d	0.210065	4.34578	1.27059	0.259656	0.999911	0	0
Mllt3	0.209929	5.50225	1.63854	0.200526	0.999911	ts_m218	0
Arsa	0.209856	4.98646	1.87014	0.171459	0.999911	0	0
Mcat	0.209463	5.3966	2.12208	0.14519	0.999911	0	0
Gmeb2	0.209363	4.34727	1.33663	0.24763	0.999911	0	0
Tomm40l	0.209348	4.77328	1.46416	0.226269	0.999911	0	0
Sez6l	0.209222	7.07185	3.6033	0.057665	0.999911	0	0
Mul1	0.209069	5.77369	1.99088	0.158248	0.999911	0	0
Zzz3	0.208886	5.57543	2.3206	0.127671	0.999911	0	0
Dock10	0.208807	4.18547	0.717017	0.397124	0.999911	0	0
Siah2	0.208771	4.09656	1.02095	0.312294	0.999911	ts_m218	0
Rrm2b	0.208321	4.08624	0.98402	0.321208	0.999911	0	0
Ndor1	0.208316	4.56989	1.54099	0.21447	0.999911	0	0
B3gntl1	0.208304	3.44972	0.800699	0.370885	0.999911	0	0
Rbpj	0.207789	3.87532	1.03787	0.308316	0.999911	0	0
Cdc73	0.20769	4.67646	1.57194	0.209926	0.999911	ts_m218	0
Vps53	0.207494	5.80024	2.77298	0.0958675	0.999911	0	0
Xiap	0.20726	5.60426	1.57565	0.209389	0.999911	0	0
Xpo6	0.207162	6.76343	3.93105	0.0474024	0.999911	0	0
Cdyl	0.206789	4.52724	1.2563	0.262352	0.999911	0	0
Gcc2	0.206725	4.88351	1.66886	0.196412	0.999911	0	0
Eif5b	0.206014	4.71416	1.404	0.236056	0.999911	0	0
Ttll12	0.206004	5.23571	1.9824	0.159138	0.999911	0	0
Rif1	0.205776	4.47923	1.13038	0.287694	0.999911	0	0
Klhl21	0.205615	4.18502	1.12994	0.287788	0.999911	0	0
Tpp1	0.205578	3.99979	1.09147	0.296146	0.999911	0	0
Tmem50b	0.205514	6.45702	2.99492	0.0835258	0.999911	0	0
Negr1	0.205361	6.52294	3.02769	0.0818545	0.999911	0	0
Slit2	0.205078	5.70716	2.47635	0.11557	0.999911	ts_m218	0
Amot	0.205062	5.57014	2.37935	0.122949	0.999911	0	0
Cnot6	0.204928	5.75952	2.52071	0.11236	0.999911	0	0
Pcbp3	0.20482	4.53955	1.44598	0.229175	0.999911	0	0
Trappc2	0.204391	3.77822	0.946519	0.330607	0.999911	0	0
Rps19bp1	0.204105	4.11039	1.13065	0.287638	0.999911	0	0
Hist1h1d	0.204055	6.45568	3.01819	0.0823351	0.999911	0	0
Slc25a40	0.203731	3.33833	0.72804	0.393519	0.999911	0	0
Btg2	0.203604	4.59224	1.35697	0.244064	0.999911	0	0
Lrrc24	0.203565	4.42512	1.25082	0.263395	0.999911	0	0
Cpeb1	0.203471	3.88412	0.991367	0.319409	0.999911	0	0
Abhd2	0.203237	7.49464	3.94364	0.0470488	0.999911	ts_m218	0
Idi1	0.203142	3.32724	0.700904	0.40248	0.999911	0	0
Hspb8	0.203023	4.25011	1.21929	0.269501	0.999911	0	0
Grn	0.202872	5.30849	1.69969	0.192329	0.999911	0	0
Anp32e	0.202504	5.5399	2.23581	0.134846	0.999911	0	0
Pnpla6	0.202444	6.05591	2.69798	0.100476	0.999911	0	0
Sap130	0.202172	4.33868	1.2452	0.264471	0.999911	0	0
Msn	0.202145	4.85582	1.66465	0.196977	0.999911	0	0
Srebf1	0.201685	5.66057	1.94645	0.162969	0.999911	0	0
Pprc1	0.201549	4.19762	1.03607	0.308737	0.999911	0	0
Sorbs1	0.201429	5.39006	2.09106	0.148163	0.999911	ts_m218	0
Dock11	0.201379	4.13151	1.0084	0.315286	0.999911	0	0
Vac14	0.201086	5.20829	1.86318	0.172259	0.999911	0	0
Plcl1	0.200955	3.97028	0.932037	0.334334	0.999911	0	0
Rilpl2	0.200864	4.98435	1.63117	0.201542	0.999911	0	0
Vim	0.200804	7.12181	4.04032	0.0444255	0.999911	0	0
Lman1	0.200605	5.263	1.98988	0.158353	0.999911	0	0
Esco1	0.200474	3.80821	0.893767	0.344458	0.999911	0	0
Nbeal1	0.200398	5.43832	1.86034	0.172586	0.999911	ts_m218	0
Gstm1	0.200359	3.80476	0.883954	0.347121	0.999911	0	0
Rit1	0.200113	5.6935	2.23021	0.135336	0.999911	0	0
Dennd1a	0.200024	5.22069	1.93776	0.163912	0.999911	0	0
Inpp4a	0.199877	6.48628	2.92019	0.0874778	0.999911	0	0
Alkbh8	0.199566	3.83408	0.706738	0.400529	0.999911	0	0
Clu	0.199394	7.3742	4.62273	0.031551	0.959464	0	0
Fbxl14	0.19927	5.16397	1.5889	0.207484	0.999911	ts_m218	0
Chaf1a	0.199228	3.87111	0.929863	0.334898	0.999911	0	0
Lbr	0.199217	4.97713	1.71902	0.189819	0.999911	0	0
Adcy6	0.199197	5.5693	2.30338	0.129093	0.999911	0	0
Ptger1	0.199128	4.1433	1.0419	0.30738	0.999911	ts_m218	0
Sidt2	0.198754	6.43361	2.90705	0.0881931	0.999911	0	0
Rc3h1	0.198544	5.98679	2.04443	0.152764	0.999911	0	0
Atp11a	0.198415	6.19105	2.2626	0.132532	0.999911	0	0
Yeats4	0.198322	5.20032	1.8004	0.179664	0.999911	ts_m218	0
Dpy19l3	0.198277	6.0566	2.82022	0.0930839	0.999911	ts_m218	0
Med16	0.19825	5.02593	1.50542	0.21984	0.999911	0	0
Kcnn2	0.198233	4.41621	1.2845	0.257063	0.999911	0	0
Slc44a2	0.197833	5.46511	2.18579	0.139289	0.999911	0	0
Rhot2	0.197767	4.13165	1.0845	0.297694	0.999911	0	0
Mdm2	0.197644	4.99684	1.60228	0.20558	0.999911	0	0
Top1	0.197493	5.28033	1.63354	0.201214	0.999911	0	0
Synj2	0.197405	5.42873	1.45585	0.227592	0.999911	0	0
Pon2	0.197376	4.78649	1.46307	0.226442	0.999911	0	0
Supt7l	0.197107	4.25226	1.13245	0.287254	0.999911	0	0
Rab39b	0.196973	4.37518	1.01112	0.314634	0.999911	0	0
Etv6	0.196934	3.76053	0.799139	0.371351	0.999911	0	0
Dusp16	0.196916	3.21665	0.608874	0.435212	0.999911	0	0
Hnrnpa1	0.196808	5.56128	2.06323	0.15089	0.999911	ts_m218	0
Rdh10	0.196803	4.81595	1.43716	0.2306	0.999911	0	0
Ranbp1	0.196395	6.02039	2.13048	0.144395	0.999911	0	0
Atp2b4	0.196379	6.70354	1.84721	0.174109	0.999911	0	0
Pfkfb2	0.19636	5.10859	1.51487	0.218398	0.999911	0	0
Pde3b	0.195758	4.43781	1.22406	0.268565	0.999911	0	0
Nptxr	0.1957	9.046	4.49001	0.0340934	0.971461	0	0
Pla2g12a	0.195544	4.10759	0.99512	0.318494	0.999911	0	0
Fmn2	0.195233	4.94051	1.60822	0.204742	0.999911	0	0
Nfya	0.194915	4.94074	1.60403	0.205332	0.999911	0	0
Sfpq	0.19489	7.07775	2.47472	0.11569	0.999911	0	0
Zfp317	0.194696	4.55894	1.30604	0.253112	0.999911	0	0
Rcn1	0.193827	5.33666	1.9526	0.162307	0.999911	0	0
Plcb4	0.193542	3.57379	0.556749	0.455573	0.999911	0	0
Grik1	0.193534	3.90995	0.747809	0.387171	0.999911	0	0
Stxbp1	0.193508	7.2797	2.6042	0.106581	0.999911	ts_m218	bc5_chi_m218
Ipo7	0.193191	6.52933	2.60163	0.106754	0.999911	0	0
Asxl1	0.193152	5.66091	2.07741	0.149493	0.999911	0	0
Csrp2	0.193083	5.90516	1.54689	0.213596	0.999911	0	0
Gsn	0.193075	4.76751	1.13223	0.287299	0.999911	0	0
Ammecr1l	0.193008	4.85248	1.45942	0.227022	0.999911	0	0
Dcun1d3	0.193	4.66421	1.35095	0.245112	0.999911	0	0
Pcdhga3	0.192868	4.30048	1.08836	0.296834	0.999911	0	0
Cul2	0.192562	5.14753	0.693531	0.404966	0.999911	0	0
Ptprr	0.192438	4.8727	1.38634	0.239023	0.999911	ts_m218	0
Rrs1	0.192109	3.79435	0.851207	0.356211	0.999911	0	0
Stk38	0.192086	5.1479	1.73754	0.187451	0.999911	0	0
Dhrs13	0.192086	4.54935	1.29802	0.254576	0.999911	0	0
Abhd4	0.191917	5.86125	1.58059	0.208675	0.999911	0	0
Tcp11l1	0.1918	4.88143	1.52992	0.216124	0.999911	0	0
Acd	0.191731	3.92135	0.871793	0.350459	0.999911	0	0
Slc5a3	0.191599	5.78112	2.34834	0.125417	0.999911	ts_m218	0
Hey1	0.191072	5.66924	2.14953	0.142613	0.999911	0	0
Ogt	0.190862	7.93171	4.08834	0.04318	0.999911	0	0
Rbm14	0.190624	3.74254	0.714687	0.397892	0.999911	0	0
Vps13c	0.190017	6.23708	1.33844	0.247309	0.999911	0	0
Ppp2r2a	0.189954	4.96977	1.36154	0.24327	0.999911	ts_m218	0
Alg9	0.189564	5.56001	1.80936	0.178585	0.999911	0	0
Cr1l	0.189502	4.50538	1.20263	0.272796	0.999911	0	0
Vstm2a	0.189408	5.92627	1.89087	0.169104	0.999911	0	0
Robo1	0.189128	7.13931	3.19397	0.0739103	0.999911	ts_m218	0
Gclm	0.188726	4.48614	1.15654	0.282183	0.999911	0	0
Wdr5	0.188696	6.07832	2.57274	0.108719	0.999911	0	0
Arfgef1	0.188555	5.89214	2.05087	0.152119	0.999911	0	0
Acot2	0.188538	3.84838	0.837484	0.360117	0.999911	0	0
Ascc1	0.188401	4.22945	1.04485	0.306696	0.999911	0	0
Nup210	0.188289	6.36394	2.15369	0.142228	0.999911	0	0
Arfgef2	0.188255	5.99125	2.01668	0.155579	0.999911	0	0
Ldoc1l	0.188024	6.30136	1.85281	0.173457	0.999911	0	0
Hist1h2bc	0.187987	5.13348	1.59154	0.207106	0.999911	0	0
Appbp2	0.187732	6.83406	2.64917	0.103604	0.999911	0	0
Nptx1	0.187707	7.46185	4.07284	0.0435779	0.999911	0	0
Dgkb	0.187674	5.04178	1.53597	0.215218	0.999911	0	0
Ahcyl1	0.18764	6.5265	3.00861	0.0828231	0.999911	0	0
Fhl1	0.187539	6.18427	2.00524	0.156756	0.999911	0	0
Appl2	0.187476	5.65741	2.06079	0.151131	0.999911	0	0
Hist1h2bn	0.187319	3.56816	0.655653	0.418099	0.999911	0	0
Uba6	0.187188	4.41096	1.09843	0.29461	0.999911	0	0
Rprm	0.186953	3.70598	0.761909	0.382732	0.999911	0	0
Rfng	0.186612	4.65346	1.30161	0.253919	0.999911	0	0
Ece1	0.186538	4.93158	1.33537	0.247852	0.999911	0	0
Itgb1bp1	0.186523	4.82752	1.35138	0.245037	0.999911	0	0
Suz12	0.186239	4.38849	0.972649	0.32402	0.999911	0	0
C2cd3	0.185762	4.59069	1.20993	0.271346	0.999911	0	0
Cd151	0.185756	5.4153	1.3962	0.237361	0.999911	0	0
Cdon	0.185755	4.48263	1.10978	0.29213	0.999911	0	0
Mid2	0.185671	4.53307	1.13675	0.286341	0.999911	ts_m218	0
Fkrp	0.185445	5.40397	1.60484	0.205219	0.999911	0	0
Dzip1l	0.185406	4.9469	1.47661	0.224306	0.999911	0	0
Pan3	0.184744	6.07213	2.17424	0.140338	0.999911	0	0
Slc7a11	0.184501	5.49868	1.43918	0.230272	0.999911	0	0
Smarce1	0.184286	5.58388	1.75517	0.185228	0.999911	0	0
Ece2	0.184276	5.3048	1.57782	0.209074	0.999911	0	0
B3galt6	0.183856	5.49775	1.17316	0.278754	0.999911	0	0
Celsr2	0.18381	7.24317	1.55466	0.212449	0.999911	0	0
2310022B05Rik	0.183665	5.63242	1.98843	0.158505	0.999911	0	0
Ptprz1	0.183628	8.19889	1.78955	0.180981	0.999911	0	0
Rps27l	0.183454	5.07228	1.40011	0.236705	0.999911	0	0
Prkag2	0.182993	5.59441	1.69453	0.193004	0.999911	0	0
Dda1	0.182965	6.36195	1.99354	0.157971	0.999911	0	0
Triobp	0.182799	4.38037	1.06741	0.301531	0.999911	0	0
Sec61a1	0.182786	7.77409	2.23387	0.135015	0.999911	ts_m218	0
Insig2	0.182721	4.82014	1.30102	0.254027	0.999911	0	0
Samd14	0.182663	6.72416	2.61713	0.105716	0.999911	0	0
Pank1	0.18264	4.71316	1.23925	0.265616	0.999911	0	0
Lifr	0.182579	6.00228	1.91976	0.165883	0.999911	ts_m218	0
Oaf	0.18253	3.38174	0.597378	0.43958	0.999911	0	0
Lrrc28	0.182434	4.64896	1.16741	0.279934	0.999911	0	0
Prkg1	0.182386	4.34738	1.0531	0.304795	0.999911	ts_m218	0
Nsmaf	0.182311	5.70594	1.80679	0.178893	0.999911	0	0
Fbxw9	0.182167	6.04932	2.0383	0.153381	0.999911	0	0
Dse	0.182114	4.1821	0.949073	0.329955	0.999911	0	0
Slc35b4	0.182076	5.03895	1.49031	0.222169	0.999911	0	0
Ttc9	0.181928	5.36573	1.70242	0.191972	0.999911	0	0
Flrt2	0.18168	5.67038	1.59009	0.207314	0.999911	ts_m218	0
Prpf39	0.181649	4.22395	0.922442	0.336835	0.999911	0	0
Paqr4	0.181448	6.11804	2.41025	0.120543	0.999911	0	0
Fkbp14	0.181443	4.23116	0.962627	0.326526	0.999911	0	0
Smpd4	0.180994	5.03343	1.36862	0.242049	0.999911	0	0
Terf2ip	0.180866	5.91299	2.18472	0.139386	0.999911	0	0
2810004N23Rik	0.180817	4.18392	0.743323	0.388599	0.999911	0	0
Id2	0.180652	5.78254	1.5001	0.220656	0.999911	0	0
Cpeb2	0.180608	5.81261	1.51219	0.218805	0.999911	ts_m218	0
Crocc	0.180591	5.16618	1.38122	0.239893	0.999911	0	0
Nos1	0.180195	5.64707	1.81473	0.177942	0.999911	0	0
Fjx1	0.17977	6.00669	1.9469	0.162921	0.999911	0	0
Zc3h13	0.179705	5.13594	1.48953	0.22229	0.999911	0	0
Kbtbd3	0.179589	3.08979	0.47834	0.489175	0.999911	ts_m218	0
Zbtb41	0.179525	5.12178	1.50107	0.220507	0.999911	ts_m218	0
Usp30	0.179513	5.27797	1.6063	0.205013	0.999911	0	0
Osbpl6	0.17938	5.4667	1.46608	0.225965	0.999911	ts_m218	0
Cdh12	0.179101	4.28026	0.877351	0.348928	0.999911	0	0
Hnrnpd	0.17906	5.87832	1.84426	0.174452	0.999911	0	0
Tmed5	0.179059	3.46869	0.598748	0.439056	0.999911	0	0
Dad1	0.178708	4.80284	1.18465	0.276412	0.999911	0	0
Zer1	0.178677	6.3059	1.93509	0.164203	0.999911	0	0
Phtf2	0.17861	5.13367	1.27232	0.259332	0.999911	0	0
Celsr3	0.178572	6.60633	2.61533	0.105836	0.999911	0	0
Acadm	0.178505	4.82348	1.28288	0.257365	0.999911	0	0
Slc16a2	0.178476	6.87921	2.41737	0.119996	0.999911	0	0
Srd5a1	0.178331	3.97944	0.816578	0.366183	0.999911	0	0
Samd8	0.178321	6.90668	3.02368	0.0820572	0.999911	ts_m218	0
Elovl2	0.178315	4.87526	1.0745	0.299932	0.999911	0	0
St8sia5	0.17804	4.02789	0.839121	0.359648	0.999911	0	0
Trp53inp1	0.177824	4.99904	1.03216	0.309652	0.999911	ts_m218	0
Lrrcc1	0.177785	3.29884	0.527402	0.467701	0.999911	0	0
Bbs9	0.177592	5.14593	1.45703	0.227404	0.999911	0	0
Mbnl2	0.177565	5.68345	1.90112	0.167953	0.999911	ts_m218	0
Entpd7	0.177557	4.51245	1.0187	0.312828	0.999911	0	0
Itgb5	0.17742	5.63851	1.56715	0.210622	0.999911	0	0
Cul4b	0.177325	4.08153	0.573368	0.448924	0.999911	0	0
Tmem209	0.177022	4.38631	0.917026	0.338257	0.999911	0	0
Ctsa	0.176925	5.91006	1.2524	0.263095	0.999911	0	0
Arid1b	0.176906	6.52841	2.56998	0.108909	0.999911	0	0
Sec23ip	0.176762	5.2786	1.50237	0.220306	0.999911	0	0
Syne2	0.176643	5.79662	1.92982	0.164778	0.999911	0	0
Ubash3b	0.176597	5.78269	1.60091	0.205774	0.999911	0	0
Rfx7	0.176575	4.99867	1.20537	0.27225	0.999911	0	0
Rab7	0.176353	5.51997	1.41122	0.234854	0.999911	0	0
Acvr2a	0.17631	5.56414	1.75406	0.185368	0.999911	0	0
Zfp536	0.176265	5.18244	1.10307	0.293594	0.999911	0	0
Aldh6a1	0.176154	4.69942	1.11238	0.291564	0.999911	0	0
AI837181	0.176048	4.77929	1.17097	0.279201	0.999911	0	0
Tmem135	0.175979	5.6496	1.73182	0.188179	0.999911	0	0
Dennd4c	0.175773	4.42018	0.954188	0.328656	0.999911	0	0
Dip2b	0.175695	6.76448	2.37089	0.123616	0.999911	0	0
Rsbn1	0.175651	4.6027	1.09338	0.295723	0.999911	0	0
Mrpl16	0.175402	4.88202	1.24967	0.263616	0.999911	0	0
Phf6	0.175331	4.80712	1.15608	0.282279	0.999911	ts_m218	0
Col5a2	0.175315	5.35732	0.922879	0.33672	0.999911	0	0
Cpne5	0.175041	4.38679	0.882376	0.347552	0.999911	0	0
Pelp1	0.174877	4.74971	0.991749	0.319315	0.999911	0	0
Polr3b	0.174803	4.70117	1.08891	0.296713	0.999911	0	0
Dscam	0.174681	5.94899	0.924783	0.336222	0.999911	0	0
Trrap	0.174627	7.70811	2.52161	0.112296	0.999911	0	0
Pcf11	0.174463	4.60437	1.08158	0.298344	0.999911	0	0
Ccnt2	0.174226	5.79081	1.94606	0.163012	0.999911	ts_m218	0
Lmbrd2	0.174184	5.95039	2.02431	0.154799	0.999911	0	0
Rpgrip1l	0.173821	3.79097	0.689291	0.406406	0.999911	0	0
Cramp1l	0.173697	5.2799	1.5227	0.217212	0.999911	0	0
Heatr1	0.173133	5.65487	1.62329	0.202634	0.999911	0	0
Sorbs2	0.172889	6.05177	1.81313	0.178133	0.999911	0	0
Fkbp9	0.172883	6.92086	1.95145	0.162431	0.999911	0	0
Bahcc1	0.172875	3.6224	0.605365	0.436538	0.999911	0	0
Dnm2	0.172552	5.92155	1.587	0.207756	0.999911	0	0
Flnb	0.172346	6.07123	1.3471	0.245786	0.999911	0	0
Slitrk2	0.172287	4.92971	1.01063	0.314752	0.999911	ts_m218	0
Mrps6	0.172236	4.56376	1.04746	0.306093	0.999911	0	0
Lonrf1	0.172212	3.78535	0.654252	0.418596	0.999911	0	0
Rnf130	0.172194	5.653	1.79904	0.179828	0.999911	0	0
Commd2	0.171886	5.02557	1.14892	0.283775	0.999911	ts_m218	0
Dag1	0.171845	7.51945	2.8239	0.0928704	0.999911	0	0
Mapk7	0.171648	5.2218	1.43974	0.230181	0.999911	0	0
Slc32a1	0.171621	3.67619	0.590813	0.442105	0.999911	0	0
AW549877	0.171536	5.05324	1.17392	0.278598	0.999911	0	0
Rock1	0.17151	4.26202	0.650797	0.419828	0.999911	ts_m218	0
Wdtc1	0.17148	6.32886	2.22746	0.135576	0.999911	0	0
Ide	0.171391	5.8353	1.57319	0.209744	0.999911	0	0
Ahcy	0.171236	3.57177	0.588115	0.443149	0.999911	0	0
Kctd2	0.17113	5.0414	1.25526	0.262551	0.999911	0	0
Pdxk	0.170826	6.34074	2.24683	0.133888	0.999911	0	0
Heatr5a	0.170503	4.62237	1.04604	0.30642	0.999911	0	0
Slc7a1	0.170395	6.51788	2.51254	0.112944	0.999911	0	0
Zfp335	0.170177	4.35499	0.790599	0.373919	0.999911	0	0
Mark1	0.170061	6.00336	1.59872	0.206085	0.999911	ts_m218	0
Pdzd2	0.170053	5.07289	1.30075	0.254076	0.999911	0	0
Cbl	0.170026	6.25625	1.97485	0.159934	0.999911	ts_m218	0
Ints5	0.169833	4.94018	1.16894	0.27962	0.999911	0	0
Pabpc4	0.169666	4.60448	1.04195	0.307367	0.999911	0	0
Erh	0.169574	3.22563	0.454825	0.500053	0.999911	0	0
Scamp1	0.169528	7.26374	2.58725	0.107727	0.999911	0	0
Foxg1	0.169367	5.07301	1.21308	0.270724	0.999911	0	0
Spire2	0.169322	4.82458	1.00587	0.315894	0.999911	0	0
Axin2	0.169233	5.0909	1.17883	0.277595	0.999911	0	0
Spcs1	0.169199	5.67447	1.57385	0.209649	0.999911	0	0
Lats2	0.168967	5.29829	1.45385	0.227911	0.999911	0	0
Ppp1cc	0.168966	6.29976	2.02807	0.154417	0.999911	ts_m218	0
Cat	0.168954	6.31381	2.21004	0.137115	0.999911	0	0
Wnt7b	0.168816	5.84623	1.6794	0.195005	0.999911	0	0
Casp9	0.168657	4.61073	0.85083	0.356318	0.999911	0	0
Map3k13	0.168579	4.75335	0.998058	0.317781	0.999911	ts_m218	0
Mbtps1	0.168394	6.18273	2.00796	0.156475	0.999911	0	0
Gbf1	0.167985	6.52608	1.86905	0.171584	0.999911	0	0
Lhx2	0.167873	5.9778	1.80105	0.179586	0.999911	0	0
Pttg1ip	0.167803	6.27061	2.20285	0.137756	0.999911	0	bc5_chi_m218
Rasgrf2	0.167576	5.74065	1.63105	0.201558	0.999911	0	0
Gmppb	0.16757	4.56055	0.996629	0.318127	0.999911	0	0
Zfp329	0.167409	4.4213	0.887011	0.346289	0.999911	0	0
Eif1	0.167346	5.30418	1.44388	0.229512	0.999911	0	0
Zfx	0.16732	4.47475	0.91121	0.339793	0.999911	ts_m218	0
Bcl7c	0.167158	4.92186	1.1873	0.275874	0.999911	0	0
Cd276	0.167118	3.98207	0.692945	0.405165	0.999911	0	0
Zfp367	0.167068	3.46657	0.498553	0.480137	0.999911	0	0
Kif2a	0.166911	5.93156	1.72595	0.18893	0.999911	0	0
Med12	0.166605	5.02439	1.01232	0.314349	0.999911	0	0
Med20	0.166516	4.69029	1.04177	0.30741	0.999911	0	0
Rcbtb1	0.166358	5.66908	1.62222	0.202783	0.999911	ts_m218	0
Kcnip3	0.166357	5.5217	1.45905	0.227082	0.999911	ts_m218	0
Akirin1	0.166168	5.75722	1.71961	0.189744	0.999911	ts_m218	0
Arid5b	0.166107	3.40746	0.48399	0.48662	0.999911	0	0
Aasdhppt	0.165944	5.35977	0.874308	0.349765	0.999911	0	0
Ralgps1	0.165864	6.29487	1.78391	0.18167	0.999911	0	0
Magi1	0.165848	5.92218	1.11508	0.29098	0.999911	0	0
Hgs	0.165812	6.01839	1.81402	0.178027	0.999911	0	0
Hap1	0.165786	6.51597	1.37197	0.241474	0.999911	0	0
Nfe2l2	0.165724	2.73181	0.318765	0.572351	0.999911	0	0
Abat	0.165475	6.95518	2.52323	0.112181	0.999911	0	0
Zbtb22	0.16541	5.14724	1.1847	0.276401	0.999911	0	0
Utrn	0.165191	5.19741	0.987185	0.320431	0.999911	0	0
Fgf1	0.165184	4.15404	0.771538	0.379742	0.999911	0	0
Nkain1	0.164904	5.23241	1.16237	0.280975	0.999911	0	0
Etl4	0.164828	3.74249	0.578847	0.446765	0.999911	0	0
Pip5k1a	0.164642	5.34852	1.40929	0.235174	0.999911	0	0
Hcfc2	0.164539	5.36278	1.4341	0.231097	0.999911	0	0
Bdnf	0.164274	4.52032	0.871007	0.350677	0.999911	0	0
Fbxw5	0.164222	6.51465	1.28521	0.256932	0.999911	0	0
Usp16	0.164061	4.31043	0.825504	0.363576	0.999911	0	0
Smyd5	0.164	5.76329	1.70046	0.192227	0.999911	0	0
Higd2a	0.16395	4.92799	1.06006	0.303201	0.999911	0	0
Cnot6l	0.163526	5.82842	1.51923	0.217736	0.999911	ts_m218	0
Tial1	0.163391	5.7689	1.40418	0.236025	0.999911	0	0
Evl	0.163362	5.78633	1.44505	0.229325	0.999911	0	0
Kat2b	0.163324	4.55394	0.838978	0.359689	0.999911	0	0
Cog1	0.163276	5.80566	1.45728	0.227363	0.999911	0	0
Sf1	0.16317	5.37297	1.34342	0.246431	0.999911	0	0
Spred2	0.16317	4.34877	0.79912	0.371357	0.999911	ts_m218	0
Kdelr1	0.162924	6.03243	1.49768	0.221029	0.999911	0	0
Rsbn1l	0.162889	3.73962	0.568847	0.450717	0.999911	ts_m218	0
Ptgr2	0.162776	5.12608	1.22523	0.268336	0.999911	0	0
Chsy1	0.162519	5.62536	1.14842	0.28388	0.999911	ts_m218	0
Tmem178	0.162389	5.95904	1.5155	0.218302	0.999911	ts_m218	0
Fxr1	0.162382	5.33084	0.930602	0.334707	0.999911	0	0
Ocrl	0.162365	5.41273	1.2453	0.264452	0.999911	0	0
Gps1	0.162354	6.781	2.28995	0.130214	0.999911	0	0
Stoml2	0.16232	5.96292	1.61376	0.203964	0.999911	0	0
Cadm2	0.16229	7.58463	2.11428	0.14593	0.999911	ts_m218	0
Slc41a2	0.161963	5.85645	1.63061	0.201619	0.999911	0	0
Snx14	0.161254	5.15675	1.22184	0.269	0.999911	0	0
Dlgap4	0.161234	6.30482	1.42812	0.232071	0.999911	0	0
Ntsr1	0.160975	4.46784	0.849372	0.35673	0.999911	0	0
Ddah1	0.160827	6.47156	1.81719	0.177649	0.999911	0	0
Dctn6	0.160813	4.26734	0.782124	0.376492	0.999911	0	0
Polr2a	0.160796	5.97097	1.42395	0.232754	0.999911	0	0
Vcpip1	0.160716	5.69349	1.5293	0.216218	0.999911	0	0
Tmem70	0.160322	5.34966	1.35905	0.243702	0.999911	0	0
Glod4	0.160282	6.29709	1.67365	0.19577	0.999911	ts_m218	0
Nup35	0.16002	3.17397	0.403896	0.525084	0.999911	0	0
Cry1	0.159791	4.18728	0.696713	0.40389	0.999911	0	0
Speg	0.159788	6.37822	1.94427	0.163206	0.999911	0	0
Ephb1	0.159739	5.34197	0.964441	0.32607	0.999911	0	0
Pdcd11	0.159719	5.62574	1.51402	0.218526	0.999911	0	0
Ccdc6	0.15971	5.8637	1.50249	0.220289	0.999911	ts_m218	0
Gad1	0.159669	6.68876	1.22543	0.268298	0.999911	0	0
Aqp4	0.159469	7.56686	1.2781	0.258253	0.999911	0	bc5_chi_m218
Sgk1	0.159276	6.18587	1.61846	0.203307	0.999911	0	0
Syn1	0.159184	6.26476	1.57567	0.209386	0.999911	0	0
Frat2	0.158991	4.30388	0.748743	0.386874	0.999911	0	0
Alkbh5	0.158596	6.2191	1.58996	0.207332	0.999911	0	0
Pef1	0.158231	5.20222	1.17088	0.27922	0.999911	0	0
Ssr4	0.158099	6.19846	1.43637	0.230728	0.999911	0	0
Ncl	0.158097	6.00042	1.45685	0.227432	0.999911	0	0
Socs5	0.157965	5.0759	1.05723	0.303847	0.999911	0	0
Epas1	0.157921	4.94965	0.949643	0.32981	0.999911	0	0
Mkln1	0.157823	6.29335	1.00706	0.315608	0.999911	0	0
Hs6st1	0.157807	5.24837	1.25185	0.263199	0.999911	0	0
Ankfy1	0.157771	6.74707	2.04302	0.152906	0.999911	0	0
Gfm2	0.157666	5.10531	0.943214	0.331453	0.999911	0	0
Sema4f	0.157579	4.85583	1.02471	0.311404	0.999911	0	0
Msh3	0.157518	4.87543	0.871204	0.350622	0.999911	0	0
Irf2bp1	0.157443	5.81424	1.37417	0.241097	0.999911	0	0
Pxk	0.157297	4.42467	0.784123	0.375883	0.999911	0	0
Zcchc24	0.157295	5.66272	1.44015	0.230116	0.999911	0	0
Adamts17	0.157203	5.22796	0.838789	0.359743	0.999911	0	0
Uchl5	0.157061	3.50529	0.472567	0.491809	0.999911	0	0
Neto1	0.156925	5.01789	0.977687	0.322771	0.999911	0	0
2019-03-04	0.156747	5.15762	1.10673	0.292794	0.999911	ts_m218	0
Zfp64	0.156467	4.51491	0.794429	0.372764	0.999911	0	0
Ggcx	0.156437	4.47406	0.828935	0.362581	0.999911	0	0
Ier3ip1	0.156426	4.98898	1.01487	0.313738	0.999911	0	0
Cnot4	0.156416	4.77806	0.925275	0.336094	0.999911	0	0
Prkx	0.156105	4.25582	0.701968	0.402123	0.999911	0	0
Pcdhga8	0.156006	3.62415	0.422703	0.515592	0.999911	0	0
Coro2b	0.155974	5.22923	1.20799	0.27173	0.999911	0	0
Fads3	0.155914	5.94008	1.32954	0.248886	0.999911	0	0
Trpm2	0.155624	4.63237	0.872623	0.35023	0.999911	0	0
Lims1	0.155527	5.50032	1.23215	0.266989	0.999911	0	0
Prep	0.15552	5.92894	1.16331	0.280779	0.999911	0	0
Ube2f	0.155403	5.01918	0.844648	0.358071	0.999911	0	0
Ubl5	0.155297	5.8337	1.20265	0.272792	0.999911	0	0
Bckdk	0.155237	5.75542	0.881441	0.347807	0.999911	0	0
Ndufc2	0.155224	6.90446	1.80731	0.178831	0.999911	0	0
Caml	0.1552	5.73215	1.41728	0.233851	0.999911	0	0
Supv3l1	0.154972	4.80466	0.824304	0.363925	0.999911	0	0
Rnf38	0.154825	5.61637	1.41937	0.233507	0.999911	ts_m218	0
Slc22a17	0.154696	8.19309	2.30779	0.128727	0.999911	0	0
Ccnh	0.154627	4.43229	0.789951	0.374115	0.999911	0	0
Plxnb1	0.154485	7.35944	2.25486	0.133196	0.999911	0	0
Dmd	0.154364	5.93859	1.4431	0.229639	0.999911	0	0
Pard3	0.154253	5.23574	0.945283	0.330923	0.999911	0	0
Slc4a4	0.154232	6.82919	1.69578	0.19284	0.999911	0	0
Limd1	0.15408	5.27949	1.15754	0.281975	0.999911	0	0
Cdc37l1	0.154047	5.74158	1.20406	0.272512	0.999911	0	0
Donson	0.153751	3.90232	0.572054	0.449444	0.999911	0	0
Zfp248	0.153734	3.04315	0.340996	0.559255	0.999911	0	0
Hapln1	0.153706	5.31676	1.14154	0.285328	0.999911	ts_m218	0
Wbp2	0.153686	5.77914	1.49476	0.22148	0.999911	0	0
Dner	0.153479	7.67857	1.94543	0.16308	0.999911	0	0
Add3	0.153462	7.15986	2.51687	0.112634	0.999911	0	0
Dsel	0.153449	4.83159	0.934667	0.333653	0.999911	0	0
Fnta	0.153421	5.97119	1.38276	0.239631	0.999911	0	0
Dazap1	0.1533	5.90771	1.22938	0.267529	0.999911	ts_m218	0
Taf9b	0.153213	3.56068	0.468147	0.493841	0.999911	0	0
Hist1h2bl	0.153177	2.62116	0.250019	0.617061	0.999911	0	0
Wnt7a	0.153048	4.8389	0.944954	0.331007	0.999911	0	0
Pdzd8	0.152929	5.76262	1.48266	0.223359	0.999911	0	0
Cpne8	0.152783	4.42036	0.635107	0.425488	0.999911	ts_m218	0
Mboat7	0.152766	6.07044	1.54881	0.213311	0.999911	0	0
Afap1	0.152612	6.48717	1.96045	0.161465	0.999911	0	0
Fgd1	0.152449	4.20364	0.63756	0.424596	0.999911	0	0
Lrp6	0.152339	6.23622	1.36739	0.242261	0.999911	0	0
Josd1	0.152245	6.08632	1.34106	0.246848	0.999911	0	0
Dlc1	0.151817	5.86473	1.51769	0.217969	0.999911	0	0
Git2	0.151769	5.34669	0.906812	0.340962	0.999911	0	0
Lrrc3	0.15152	4.54577	0.777547	0.377892	0.999911	0	0
Dvl2	0.151512	4.50701	0.695577	0.404274	0.999911	0	0
Ndufa3	0.151509	5.82423	0.957654	0.327779	0.999911	0	0
Mid1ip1	0.151364	5.93545	1.39741	0.237157	0.999911	0	0
Ntrk3	0.15124	8.12577	1.9058	0.16743	0.999911	0	0
Lmbr1l	0.151129	4.2689	0.687985	0.406851	0.999911	0	0
Zfp592	0.150912	5.2201	1.12885	0.28802	0.999911	0	0
Abhd6	0.150812	4.40065	0.684927	0.407895	0.999911	0	0
Adam19	0.150566	5.45841	0.766542	0.381289	0.999911	0	0
Cpeb3	0.149831	4.81672	0.742297	0.388926	0.999911	0	0
Pcx	0.149678	6.35885	1.69261	0.193257	0.999911	0	0
Ddx19a	0.149625	4.10684	0.619095	0.431384	0.999911	0	0
Atp1a3	0.149456	9.19039	2.33393	0.126582	0.999911	0	0
Far1	0.149436	6.00108	1.22027	0.269308	0.999911	0	0
Ssh2	0.149412	6.24689	1.69188	0.193353	0.999911	0	0
Clcn7	0.149403	5.69171	1.36723	0.242288	0.999911	0	0
Yipf4	0.149239	5.50492	1.06315	0.302498	0.999911	0	0
Med13	0.149073	6.44096	1.59694	0.206337	0.999911	0	0
Thoc2	0.149001	5.08873	0.907623	0.340746	0.999911	ts_m218	0
Alk	0.149001	2.83351	0.272221	0.601846	0.999911	0	0
Kit	0.148995	6.61633	0.826756	0.363212	0.999911	ts_m218	0
Pitrm1	0.14884	5.20224	0.934279	0.333754	0.999911	0	0
St8sia4	0.148687	4.70657	0.763662	0.382185	0.999911	ts_m218	0
Plekha6	0.148662	5.42176	1.08693	0.297152	0.999911	0	0
Trappc9	0.148625	6.6572	1.11623	0.290732	0.999911	0	0
Asb8	0.148485	4.85439	0.840889	0.359143	0.999911	0	0
Camta1	0.148457	6.49266	1.55361	0.212603	0.999911	0	0
Hnrnpf	0.148446	3.80643	0.501501	0.478842	0.999911	0	0
Ythdf3	0.148376	5.78999	0.997546	0.317905	0.999911	0	0
Lingo2	0.148358	4.65217	0.774133	0.378941	0.999911	0	0
Lrfn2	0.148068	4.92713	0.91798	0.338006	0.999911	0	0
Impact	0.14804	6.19729	1.3814	0.239862	0.999911	0	0
Wwc2	0.147995	5.19684	0.958344	0.327604	0.999911	0	0
Clcn5	0.147621	5.24342	0.947182	0.330438	0.999911	ts_m218	0
Tbc1d22a	0.147541	5.3701	1.04417	0.306854	0.999911	0	0
Adar	0.147355	6.50178	1.84891	0.17391	0.999911	0	0
Phka1	0.147113	4.82641	0.816616	0.366172	0.999911	0	0
Zfp322a	0.147055	4.37242	0.658233	0.417184	0.999911	0	0
Top3b	0.147049	5.91032	1.2236	0.268655	0.999911	0	0
Mfn1	0.146999	5.26831	0.712598	0.398583	0.999911	0	0
Atp11b	0.14683	5.88098	0.995929	0.318298	0.999911	0	0
4933434E20Rik	0.146804	5.86219	1.2431	0.264874	0.999911	0	0
Vezf1	0.146685	4.89131	0.900988	0.342517	0.999911	0	0
Pcbp2	0.146667	5.11542	0.925377	0.336067	0.999911	0	0
Fiz1	0.146584	4.12272	0.559624	0.454412	0.999911	0	0
Zfp37	0.146548	2.77375	0.258816	0.610935	0.999911	0	0
Rufy2	0.146259	5.24858	0.78888	0.374439	0.999911	ts_m218	0
Zfp787	0.146201	4.37695	0.662279	0.415756	0.999911	0	0
Nrxn2	0.146189	7.99112	2.5348	0.111361	0.999911	0	0
Sfxn3	0.146127	5.32213	1.05891	0.303465	0.999911	0	0
2410015M20Rik	0.14597	6.26926	0.969252	0.324867	0.999911	0	0
Isca1	0.14595	4.23658	0.632863	0.426307	0.999911	0	0
Phf20l1	0.145908	6.07406	0.968534	0.325046	0.999911	0	0
2610301B20Rik	0.14571	4.32663	0.640103	0.423673	0.999911	0	0
Iqgap1	0.145636	5.69481	1.27073	0.25963	0.999911	0	0
Ap2a1	0.14551	7.26281	2.04796	0.15241	0.999911	ts_m218	0
Phrf1	0.145199	6.17344	1.52495	0.216872	0.999911	0	0
Acot1	0.1448	5.35128	1.0445	0.306777	0.999911	0	0
Gprin3	0.144716	4.9774	0.890751	0.345274	0.999911	0	0
Scn1a	0.144467	5.39798	0.870208	0.350898	0.999911	0	0
Tk2	0.144459	5.20776	1.02024	0.312462	0.999911	0	0
Sema6a	0.144379	5.19402	0.862144	0.353139	0.999911	ts_m218	0
Ube2v2	0.144355	3.79626	0.447786	0.503388	0.999911	ts_m218	0
Hibadh	0.144057	4.97172	0.912128	0.339551	0.999911	0	0
Bphl	0.144028	4.69717	0.741328	0.389236	0.999911	0	0
Agbl5	0.14386	4.25078	0.600738	0.438296	0.999911	0	0
Tanc1	0.143717	4.55996	0.698631	0.403244	0.999911	0	0
Mapre2	0.143664	7.22075	1.91496	0.166414	0.999911	0	0
Mgrn1	0.143396	7.22826	1.56396	0.211087	0.999911	0	0
Unc5c	0.143326	6.44119	1.11505	0.290988	0.999911	0	0
Zcchc12	0.143018	6.51387	1.32512	0.249675	0.999911	0	0
Dot1l	0.142961	4.95056	0.862749	0.35297	0.999911	0	0
Unkl	0.142895	3.90792	0.504922	0.477345	0.999911	0	0
Zfp346	0.142802	5.04764	0.855477	0.355007	0.999911	0	0
Spry4	0.142161	4.17112	0.529949	0.466628	0.999911	0	0
Parl	0.142127	4.45422	0.678561	0.410083	0.999911	0	0
Ppp2cb	0.142036	6.2491	1.34801	0.245626	0.999911	ts_m218	0
Lix1	0.141972	5.97038	0.818941	0.36549	0.999911	0	0
Aff3	0.141957	6.14929	1.26211	0.261251	0.999911	0	0
Phgdh	0.141783	6.5187	1.29485	0.255156	0.999911	0	0
Trove2	0.141776	6.65135	1.45204	0.228202	0.999911	0	0
Eif2s3y	0.141665	4.95554	0.822743	0.364379	0.999911	0	0
Cables2	0.141585	5.5011	0.999219	0.3175	0.999911	0	0
Aebp2	0.141395	5.25283	0.989179	0.319943	0.999911	0	0
Syt7	0.141244	7.20424	1.56203	0.211368	0.999911	0	0
Acat2	0.141242	6.49742	1.59445	0.206691	0.999911	0	0
Trub1	0.141181	4.90725	0.757578	0.384087	0.999911	0	0
Snrpd1	0.141135	4.97425	0.848227	0.357054	0.999911	0	0
Ssr2	0.140684	6.18847	1.44415	0.229469	0.999911	0	0
Isoc1	0.140657	5.22867	0.898066	0.343301	0.999911	0	0
Slmap	0.140561	4.89386	0.82971	0.362356	0.999911	0	0
Bclaf1	0.140446	6.53923	1.36087	0.243386	0.999911	0	0
Acsl1	0.140393	5.83426	1.21962	0.269435	0.999911	ts_m218	0
Pcdh15	0.140142	4.79715	0.704307	0.40134	0.999911	0	0
Tmed1	0.140099	4.7046	0.69021	0.406093	0.999911	0	0
Jup	0.139855	5.02125	0.832547	0.361537	0.999911	0	0
Slc29a4	0.139818	5.90109	0.645438	0.421749	0.999911	0	0
Rbm26	0.139792	4.95722	0.670237	0.412969	0.999911	0	0
Baz2a	0.139788	5.25014	0.731689	0.392336	0.999911	0	0
Fscn1	0.139781	7.511	1.55632	0.212205	0.999911	0	0
Inpp5e	0.139633	3.95636	0.493194	0.482506	0.999911	0	0
Insr	0.139549	6.15752	1.46503	0.226132	0.999911	0	0
Capns1	0.139539	6.63206	1.42061	0.233302	0.999911	0	0
Igsf11	0.139448	4.64575	0.663659	0.415271	0.999911	ts_m218	0
Hist1h4k	0.139261	5.12792	0.615828	0.432602	0.999911	0	0
Socs6	0.139118	4.14582	0.521594	0.470162	0.999911	ts_m218	0
Tsc22d2	0.139048	4.89114	0.73888	0.39002	0.999911	0	0
Zfp62	0.138871	3.6543	0.395842	0.529245	0.999911	0	0
Rab21	0.138835	5.56443	0.780438	0.377007	0.999911	0	0
Dnm1l	0.138824	6.36917	1.20252	0.272818	0.999911	0	0
Arid1a	0.138772	5.83891	1.17182	0.279028	0.999911	0	0
Slc25a1	0.13873	6.12128	1.15612	0.282272	0.999911	0	0
Slc20a1	0.138682	6.3682	1.51139	0.218926	0.999911	0	0
Mpzl1	0.138549	4.55423	0.628592	0.427872	0.999911	ts_m218	bc5_chi_m218
Macf1	0.138522	9.03549	0.878735	0.348548	0.999911	0	0
Rbbp4	0.138504	7.72316	2.00793	0.156479	0.999911	0	0
Edem1	0.138473	5.77514	1.03458	0.309084	0.999911	ts_m218	0
Btg1	0.138441	4.56441	0.665673	0.414564	0.999911	0	0
Rc3h2	0.138316	7.22224	1.7693	0.183469	0.999911	0	0
Hcfc1	0.137873	6.84931	1.72682	0.188818	0.999911	ts_m218	0
Btbd2	0.137813	6.10087	1.28484	0.257002	0.999911	0	0
Ankrd50	0.137387	6.01364	1.18987	0.275356	0.999911	0	0
Papolg	0.137354	4.2431	0.458706	0.498229	0.999911	0	0
Bmpr2	0.13718	7.49846	1.18861	0.275611	0.999911	0	0
Ccdc71	0.137052	5.12338	0.682788	0.408628	0.999911	0	0
Luc7l2	0.136922	6.03849	0.729286	0.393115	0.999911	0	0
Soat1	0.136862	5.63751	1.1133	0.291365	0.999911	0	0
Tsc22d4	0.136835	5.68894	1.02608	0.31108	0.999911	0	0
Hccs	0.13669	4.56281	0.468156	0.493837	0.999911	0	0
B4galt7	0.136644	4.99062	0.718197	0.396736	0.999911	0	0
Peg3	0.136597	7.16567	0.608436	0.435377	0.999911	0	0
Ttc39b	0.136405	5.18966	0.857092	0.354554	0.999911	0	0
Nlgn2	0.136266	6.97049	1.68567	0.194173	0.999911	0	0
Tmem214	0.136263	5.23572	0.779296	0.377357	0.999911	0	0
Pura	0.136225	7.67907	1.69427	0.193038	0.999911	ts_m218	0
Myef2	0.136099	5.17465	0.440752	0.50676	0.999911	0	0
Hn1l	0.135969	4.89015	0.693193	0.40508	0.999911	0	0
Ing5	0.135921	4.68887	0.632669	0.426378	0.999911	0	0
Lrp1b	0.13587	6.83007	1.11865	0.29021	0.999911	0	0
Capzb	0.135803	6.20814	1.1554	0.282421	0.999911	0	0
Klf16	0.135685	4.62773	0.665242	0.414715	0.999911	0	0
Slc38a2	0.135604	6.31364	1.26907	0.259941	0.999911	0	bc5_chi_m218
Tpp2	0.135599	5.96422	1.04555	0.306534	0.999911	0	0
Rtn2	0.135573	6.76654	1.45789	0.227266	0.999911	0	0
Mon2	0.13532	6.59819	1.5332	0.215633	0.999911	0	0
Myh9	0.135264	6.9349	1.68262	0.194577	0.999911	0	0
Tut1	0.135264	4.8881	0.751139	0.386116	0.999911	0	0
Hnrnpa2b1	0.134942	7.39285	1.5247	0.21691	0.999911	0	0
Sppl3	0.13492	5.96884	1.15932	0.281607	0.999911	0	0
B230118H07Rik	0.134881	4.04149	0.480214	0.488326	0.999911	0	0
Ptpn5	0.134562	5.86373	1.17343	0.278698	0.999911	0	0
Mlc1	0.134374	8.29845	2.08977	0.148289	0.999911	0	0
Ppp1r12a	0.134372	5.51539	0.64201	0.422984	0.999911	0	0
Ap1s2	0.134266	4.53276	0.605628	0.436439	0.999911	0	0
Tmem145	0.13411	3.98279	0.395899	0.529215	0.999911	0	0
Srgap2	0.134058	7.10574	1.5432	0.214142	0.999911	ts_m218	0
Smarcc1	0.134029	5.58443	0.851182	0.356218	0.999911	0	0
Tmem201	0.13391	5.2311	0.818643	0.365577	0.999911	0	0
Bcap31	0.133783	5.73563	1.0559	0.304152	0.999911	0	0
Fsd1l	0.133771	5.86388	0.682607	0.40869	0.999911	0	0
Dgcr2	0.13375	6.69145	1.57609	0.209324	0.999911	0	0
Cenpo	0.1337	3.34998	0.313899	0.575297	0.999911	0	0
Tmem205	0.133658	4.73836	0.688351	0.406726	0.999911	0	0
Txndc5	0.133644	6.19026	0.792533	0.373335	0.999911	0	0
Syn2	0.133621	8.5433	2.63742	0.104373	0.999911	0	0
Prelid1	0.133536	5.81129	0.78516	0.375568	0.999911	0	0
Man2b1	0.13341	5.54592	1.00504	0.316094	0.999911	0	0
Atxn2l	0.133292	5.39584	0.760683	0.383115	0.999911	0	0
AW554918	0.133288	4.2444	0.508928	0.475603	0.999911	0	0
Xrcc6	0.133266	4.98739	0.738911	0.39001	0.999911	0	0
Nol6	0.133091	6.62557	1.11734	0.290492	0.999911	0	0
Wrb	0.133082	7.12927	1.35289	0.244774	0.999911	0	0
Stx17	0.13296	4.81734	0.645196	0.421836	0.999911	0	0
Rpl29	0.132866	5.60175	0.909832	0.340159	0.999911	0	0
Sephs1	0.132719	6.22782	1.36284	0.243046	0.999911	ts_m218	0
Col25a1	0.132718	5.57426	0.49656	0.481015	0.999911	0	0
Aldh4a1	0.132689	4.02363	0.461007	0.497154	0.999911	0	0
Alcam	0.132605	6.62151	1.04813	0.305939	0.999911	0	0
Ppp1r13b	0.132584	6.28949	1.3204	0.25052	0.999911	0	0
Golt1b	0.132509	5.79793	1.12089	0.289726	0.999911	ts_m218	0
Repin1	0.132477	4.45672	0.506686	0.476577	0.999911	0	0
B3galt2	0.132399	4.33264	0.49414	0.482086	0.999911	0	0
Bcl7a	0.13233	6.5389	0.935908	0.333333	0.999911	0	0
Taf5	0.132294	4.00605	0.449157	0.502735	0.999911	0	0
Arl5b	0.132205	5.94961	0.846064	0.357668	0.999911	ts_m218	0
Taok1	0.132175	7.83303	1.52594	0.216723	0.999911	0	0
Arvcf	0.131838	6.66021	1.24867	0.263806	0.999911	0	0
Gabrb1	0.131809	6.41761	1.21804	0.269745	0.999911	0	0
Asxl2	0.131796	4.71459	0.489628	0.484093	0.999911	ts_m218	0
Tmem115	0.131648	5.51596	0.58631	0.44385	0.999911	0	0
Topbp1	0.131434	5.53328	0.841306	0.359024	0.999911	0	0
Taf11	0.131071	4.46571	0.545963	0.459972	0.999911	0	0
Itpk1	0.13103	6.24344	1.11581	0.290823	0.999911	0	0
Fam174a	0.130966	5.38792	0.88167	0.347745	0.999911	0	0
Usmg5	0.13092	5.93107	0.972041	0.324172	0.999911	0	0
Mphosph9	0.130894	4.77305	0.669675	0.413165	0.999911	0	0
Sh3rf1	0.13075	6.32171	1.22587	0.268212	0.999911	ts_m218	0
Adam10	0.130729	5.30356	0.860871	0.353495	0.999911	0	0
Samd1	0.130695	5.43206	0.647	0.421187	0.999911	0	0
Phip	0.130541	6.20163	1.00311	0.316559	0.999911	0	0
Gtf2ird1	0.130493	4.14993	0.465288	0.495163	0.999911	0	0
Pcdh8	0.130407	6.21778	1.28475	0.257018	0.999911	ts_m218	0
Zzef1	0.130376	7.47073	1.28075	0.257759	0.999911	0	0
Pcdh7	0.130277	5.7054	1.00694	0.315637	0.999911	0	0
Emp2	0.130224	5.94592	1.0968	0.294969	0.999911	0	0
Mtmr14	0.130118	5.06065	0.716717	0.397223	0.999911	0	0
Cd47	0.130007	5.77952	1.0143	0.313876	0.999911	0	0
Gabpa	0.129689	4.79748	0.533928	0.46496	0.999911	ts_m218	0
Myo5b	0.129484	6.9679	1.30187	0.253872	0.999911	0	0
Mapre3	0.129414	4.89621	0.661927	0.415881	0.999911	0	0
Arid2	0.12938	5.97745	0.927195	0.335593	0.999911	0	0
Baalc	0.129341	3.6814	0.350624	0.55376	0.999911	0	0
Cul7	0.129215	6.34771	0.866556	0.351911	0.999911	0	0
Chd8	0.129137	6.36507	0.964863	0.325965	0.999911	0	0
Hist1h1c	0.128876	6.52547	0.858082	0.354276	0.999911	0	0
Ttn	0.128836	5.8656	0.476601	0.489966	0.999911	0	0
Wbp11	0.128689	4.73397	0.621322	0.430556	0.999911	0	0
Rrbp1	0.128353	4.93464	0.682697	0.40866	0.999911	0	0
Gfpt1	0.128334	6.31681	0.969566	0.324788	0.999911	ts_m218	0
Slc4a8	0.128212	6.35425	1.3112	0.252178	0.999911	0	0
Mmaa	0.128191	3.88609	0.397645	0.528308	0.999911	0	0
Atad2b	0.128012	4.41571	0.46421	0.495663	0.999911	0	0
Sh3bgrl	0.127954	6.10577	0.812171	0.367479	0.999911	0	0
Pcdha7	0.127756	3.00144	0.225268	0.635055	0.999911	0	0
Bace1	0.127591	6.79073	1.26943	0.259873	0.999911	0	0
Zfp687	0.127309	4.80196	0.638238	0.42435	0.999911	0	0
Elof1	0.127214	5.90997	0.76633	0.381355	0.999911	0	0
Pcdh17	0.127145	5.51149	0.71496	0.397802	0.999911	0	0
Rbm15	0.127078	5.3858	0.832788	0.361468	0.999911	0	0
Mto1	0.127076	4.86964	0.647854	0.420881	0.999911	0	0
Rfk	0.127026	5.3236	0.833939	0.361136	0.999911	0	0
Wnk2	0.126888	5.13753	0.534141	0.464871	0.999911	0	0
Elavl2	0.126391	6.47468	1.28911	0.256211	0.999911	0	0
Cotl1	0.126319	6.53906	1.07243	0.300398	0.999911	0	0
Wdr26	0.126203	6.64693	1.0845	0.297694	0.999911	ts_m218	0
Coro1b	0.126198	5.76813	1.02021	0.31247	0.999911	0	0
Zfp397	0.126139	4.38586	0.449865	0.502399	0.999911	0	0
Spred3	0.126113	4.32172	0.497595	0.480559	0.999911	0	0
Clint1	0.126058	5.23231	0.76679	0.381212	0.999911	0	0
Fyco1	0.126009	4.66148	0.577874	0.447147	0.999911	ts_m218	0
Ptprg	0.125817	6.98371	0.727745	0.393615	0.999911	0	0
Dusp1	0.125785	3.43127	0.290831	0.589688	0.999911	0	0
Cbx4	0.125023	4.86943	0.606745	0.436016	0.999911	0	0
Sat1	0.125011	5.1202	0.711449	0.398963	0.999911	0	0
Zkscan17	0.124976	4.15266	0.408753	0.522603	0.999911	0	0
Sh3pxd2b	0.124849	5.42389	0.73121	0.392491	0.999911	0	0
Slc23a2	0.124807	7.23627	1.66092	0.197479	0.999911	0	0
Polr2f	0.124774	5.47851	0.720453	0.395995	0.999911	0	0
Cep78	0.124752	4.9131	0.642931	0.422652	0.999911	0	0
Thtpa	0.124682	5.66203	0.902619	0.34208	0.999911	ts_m218	0
Pum2	0.124338	7.0809	0.740586	0.389473	0.999911	ts_m218	0
Hadhb	0.124317	5.22256	0.75952	0.383479	0.999911	0	0
Zfp609	0.124103	4.36317	0.314104	0.575173	0.999911	ts_m218	0
Cd9	0.12396	5.45083	0.81908	0.365449	0.999911	0	0
Ppp6c	0.123932	6.14647	1.08235	0.298172	0.999911	0	0
Ank2	0.123886	9.43457	0.99442	0.318664	0.999911	0	0
Ccdc50	0.123802	6.77642	0.57928	0.446595	0.999911	0	0
Med25	0.123739	5.06695	0.632175	0.426559	0.999911	ts_m218	0
Ankrd13a	0.123719	5.6306	0.861536	0.353309	0.999911	0	0
Gucy1a2	0.12369	5.83511	0.825289	0.363638	0.999911	ts_m218	0
Wtap	0.123648	5.39249	0.673814	0.411725	0.999911	0	0
Man1a	0.123638	5.36921	0.596007	0.440106	0.999911	0	0
Rrp1b	0.123493	4.13951	0.422655	0.515615	0.999911	0	0
Cdan1	0.123361	4.94294	0.63103	0.426978	0.999911	0	0
Gldc	0.123358	5.2838	0.588481	0.443007	0.999911	0	0
Vps13b	0.123176	6.43402	1.24939	0.26367	0.999911	0	0
Ubr3	0.123145	7.25639	1.31387	0.251695	0.999911	ts_m218	0
Pphln1	0.122971	4.4357	0.454599	0.500159	0.999911	0	0
Stat3	0.122967	6.39817	0.592232	0.441557	0.999911	0	0
Lrrc58	0.122933	7.26146	1.05763	0.303755	0.999911	0	0
BC037034	0.122912	5.70393	0.873821	0.3499	0.999911	0	0
Gpx1	0.122833	5.84093	0.761418	0.382885	0.999911	0	0
Gpr155	0.122784	5.11002	0.576385	0.447733	0.999911	0	0
Med1	0.122718	5.85578	0.80806	0.368694	0.999911	0	0
Grm7	0.122464	6.3736	0.625684	0.428943	0.999911	0	0
Cacybp	0.122358	5.41839	0.470572	0.492724	0.999911	0	0
Zfp84	0.122287	4.02951	0.392753	0.530856	0.999911	0	0
Bet1	0.1221	3.74078	0.332477	0.564204	0.999911	0	0
Cdh2	0.122042	6.18923	0.995495	0.318403	0.999911	ts_m218	0
Rps6ka5	0.122031	4.61885	0.445901	0.504288	0.999911	0	0
Cnot2	0.12199	5.44016	0.651279	0.419656	0.999911	ts_m218	0
Echs1	0.121896	6.62007	1.31128	0.252164	0.999911	0	0
Fubp1	0.121735	7.17684	1.23664	0.26612	0.999911	ts_m218	0
Hist2h2ac	0.121698	4.36014	0.453138	0.500849	0.999911	0	0
Fmnl2	0.121568	5.52993	0.530946	0.46621	0.999911	0	0
Fnbp1l	0.121568	6.24177	0.681209	0.409171	0.999911	0	0
Arhgap29	0.121527	4.29289	0.450122	0.502277	0.999911	0	0
Rnf128	0.121374	3.03404	0.210847	0.646104	0.999911	0	0
Kcnt2	0.121344	5.45074	0.630352	0.427226	0.999911	0	0
Tia1	0.121332	6.57684	0.967103	0.325404	0.999911	0	0
B630019K06Rik	0.121294	3.89389	0.355263	0.551149	0.999911	0	0
Gaa	0.121293	6.72516	1.24097	0.265285	0.999911	0	0
Rapgef4	0.121222	6.60962	0.965236	0.325871	0.999911	ts_m218	0
D930015E06Rik	0.121173	6.02504	1.03658	0.308617	0.999911	0	0
Nkiras2	0.121121	4.98627	0.508497	0.47579	0.999911	0	0
Stk11	0.121021	5.8203	0.818972	0.365481	0.999911	0	0
Abcg4	0.120958	5.41519	0.610327	0.434665	0.999911	ts_m218	0
Stard4	0.120934	4.92221	0.587664	0.443324	0.999911	0	0
Rev3l	0.120798	6.78187	0.869756	0.351023	0.999911	0	0
Prokr2	0.120735	3.08979	0.214834	0.643005	0.999911	0	0
Ankrd52	0.120658	5.82328	0.902667	0.342068	0.999911	ts_m218	0
Dlgap2	0.120637	5.29509	0.459978	0.497634	0.999911	0	0
Mcoln1	0.120567	4.85921	0.574094	0.448637	0.999911	0	0
Qdpr	0.120403	4.2877	0.436072	0.509024	0.999911	0	0
Sdc2	0.120215	4.6215	0.514467	0.473212	0.999911	ts_m218	0
Ube4a	0.12021	6.20608	1.10927	0.292241	0.999911	0	0
Ccdc85a	0.120165	5.46603	0.759476	0.383493	0.999911	0	0
Ireb2	0.12004	6.50188	1.08003	0.29869	0.999911	0	0
Ubqln1	0.120032	7.08288	1.21229	0.270879	0.999911	0	0
Ccdc91	0.120013	5.42116	0.491364	0.483319	0.999911	0	0
Rgs8	0.119937	5.0714	0.663192	0.415435	0.999911	ts_m218	0
Smurf1	0.119827	6.073	0.975531	0.323305	0.999911	0	0
Usp49	0.119745	3.446	0.264276	0.607197	0.999911	ts_m218	0
Errfi1	0.119597	4.89191	0.592954	0.441279	0.999911	0	0
Ubr5	0.119569	7.78052	0.838976	0.35969	0.999911	0	0
Dolk	0.119418	5.18303	0.671316	0.412593	0.999911	0	0
Fmnl1	0.119385	3.92666	0.355545	0.550991	0.999911	0	0
Axin1	0.119201	5.40184	0.582188	0.445456	0.999911	0	0
Pdcd4	0.118962	5.05184	0.379769	0.537727	0.999911	0	0
Islr2	0.118929	9.4489	0.635589	0.425313	0.999911	ts_m218	0
Tmtc3	0.118926	3.28937	0.240333	0.623965	0.999911	0	0
Mrpl27	0.118878	4.22348	0.411311	0.521305	0.999911	0	0
Tmem206	0.118829	3.833	0.329142	0.566165	0.999911	0	0
Siah1a	0.118665	5.19466	0.634633	0.425661	0.999911	0	0
Gstp1	0.118464	5.13726	0.661647	0.415979	0.999911	0	0
Alg1	0.118404	4.97815	0.474604	0.490877	0.999911	0	0
Tbc1d9b	0.118386	7.13888	1.14707	0.284162	0.999911	0	0
Hipk2	0.118249	4.97272	0.523434	0.469381	0.999911	0	0
Plekhm3	0.118174	5.34204	0.698428	0.403313	0.999911	0	0
Fmr1	0.118155	5.24068	0.418654	0.517609	0.999911	0	0
Gpr19	0.11805	4.05967	0.361727	0.547549	0.999911	0	0
M6pr	0.117956	6.2861	1.01588	0.313498	0.999911	0	0
Las1l	0.117873	4.77735	0.517487	0.471916	0.999911	0	0
Rragc	0.117724	5.34983	0.687299	0.407085	0.999911	0	0
Trim24	0.117719	5.31829	0.689901	0.406198	0.999911	0	0
Tmcc3	0.11768	4.25507	0.35342	0.552184	0.999911	0	0
Fam171a1	0.117529	5.72192	0.798756	0.371466	0.999911	0	0
Rb1	0.117327	5.3365	0.515988	0.472558	0.999911	0	0
Ehd1	0.117269	6.47101	0.664116	0.415111	0.999911	0	0
Atp6v0a2	0.116972	5.62926	0.793019	0.373189	0.999911	0	0
Ext1	0.116788	5.41137	0.730358	0.392767	0.999911	0	0
Hist1h4d	0.116632	6.75155	0.895716	0.343933	0.999911	0	0
Sgms1	0.11656	4.97386	0.594996	0.440494	0.999911	0	0
Ntrk2	0.116519	8.65785	1.45139	0.228304	0.999911	0	0
Ahdc1	0.116443	4.80678	0.494011	0.482144	0.999911	0	0
Camk2n2	0.116372	4.0216	0.341851	0.558762	0.999911	0	0
Gatad2a	0.116349	5.44054	0.728567	0.393348	0.999911	0	0
Tesk1	0.11634	4.81588	0.54009	0.462396	0.999911	0	0
Mpp5	0.116306	3.91445	0.334485	0.56303	0.999911	0	0
Ccnl2	0.116235	6.79369	1.23667	0.266114	0.999911	0	0
Sfxn5	0.116227	7.9715	0.812196	0.367472	0.999911	ts_m218	0
Nfatc3	0.116201	4.0893	0.352372	0.552774	0.999911	ts_m218	0
Wdr33	0.116198	6.0495	0.852634	0.355808	0.999911	0	0
Unc119b	0.116123	5.55382	0.656658	0.417742	0.999911	0	0
Mrpl38	0.116089	4.79515	0.542483	0.461405	0.999911	0	0
Med21	0.116048	3.97929	0.345075	0.556914	0.999911	0	0
Plcb1	0.11594	6.44448	0.794616	0.372708	0.999911	0	0
Il6st	0.115888	6.87519	1.19653	0.274016	0.999911	0	0
Ttbk2	0.115751	5.65858	0.644701	0.422013	0.999911	0	0
Pcmtd2	0.115717	5.24045	0.608972	0.435175	0.999911	0	0
Rad23a	0.115659	4.89728	0.555186	0.456206	0.999911	0	0
Pofut1	0.115551	5.33762	0.649254	0.42038	0.999911	0	0
Pcdhgc4	0.115548	5.47491	0.553802	0.456769	0.999911	0	0
Ythdc1	0.115545	4.93719	0.453559	0.50065	0.999911	0	0
Id1	0.115145	4.76165	0.417936	0.517969	0.999911	0	0
Scpep1	0.115141	4.201	0.386643	0.534069	0.999911	0	0
Pcdh1	0.115	7.18127	1.3242	0.24984	0.999911	ts_m218	0
Raly	0.114987	6.61431	1.04304	0.307116	0.999911	0	0
Ndufs8	0.114985	5.83882	0.717352	0.397014	0.999911	0	0
Zfp398	0.114909	5.12438	0.564348	0.452514	0.999911	0	0
Pitpnb	0.114904	3.63515	0.266428	0.605738	0.999911	0	0
Kcnv1	0.114755	4.59586	0.426416	0.513753	0.999911	0	0
Habp4	0.114749	6.03988	0.907346	0.340819	0.999911	0	0
Zfp574	0.114695	4.14324	0.335806	0.56226	0.999911	0	0
Ermp1	0.114423	6.20953	0.974423	0.32358	0.999911	ts_m218	0
Cpsf6	0.114324	7.03832	1.14457	0.284688	0.999911	0	0
Ncbp2	0.114273	5.12858	0.603829	0.437121	0.999911	0	0
Ptbp1	0.114235	5.26181	0.516732	0.472239	0.999911	0	0
Eps15l1	0.114073	6.03591	0.926537	0.335764	0.999911	0	0
Ube2q2	0.11407	4.55417	0.381728	0.53668	0.999911	ts_m218	0
Kcnn3	0.114008	4.37881	0.378297	0.538516	0.999911	ts_m218	0
Tmem19	0.113935	4.80478	0.521363	0.470261	0.999911	0	0
Gadd45b	0.11379	2.91692	0.171517	0.678767	0.999911	0	0
Syngr1	0.113777	8.80414	1.25151	0.263263	0.999911	ts_m218	0
Acss1	0.113737	5.14049	0.463048	0.496203	0.999911	0	0
Memo1	0.113431	5.03611	0.562967	0.453067	0.999911	ts_m218	0
Gyg	0.113408	4.84212	0.509752	0.475246	0.999911	0	0
Txnrd3	0.113386	4.20239	0.367981	0.544107	0.999911	0	0
Gapdh	0.113364	7.53224	1.13386	0.286953	0.999911	0	0
Pcsk1n	0.113335	5.54146	0.728201	0.393467	0.999911	0	0
A230050P20Rik	0.113209	4.0753	0.315495	0.574328	0.999911	0	0
Actn1	0.113109	4.95644	0.501852	0.478687	0.999911	ts_m218	0
F3	0.113109	3.76881	0.252913	0.615031	0.999911	0	0
Nnt	0.113098	5.19563	0.626079	0.428797	0.999911	0	0
Ccni	0.113025	8.08005	1.31752	0.251037	0.999911	0	0
Nid1	0.112906	5.81959	0.81032	0.368026	0.999911	0	0
Nf1	0.112866	7.50595	0.840209	0.359337	0.999911	0	0
Mtf2	0.112831	4.8569	0.329955	0.565686	0.999911	ts_m218	0
Vezt	0.11277	6.83491	1.22542	0.268299	0.999911	0	0
Mrpl32	0.1126	4.65875	0.461201	0.497063	0.999911	0	0
Rprd2	0.112499	5.55038	0.718709	0.396568	0.999911	0	0
Csnk2a2	0.11243	3.94107	0.309442	0.578023	0.999911	0	0
Mrpl1	0.112254	4.27432	0.37956	0.537839	0.999911	0	0
Sod2	0.112154	7.74182	1.09458	0.295459	0.999911	0	0
Tpbg	0.112121	3.79937	0.291443	0.589297	0.999911	0	0
Cdo1	0.111826	5.02002	0.522615	0.469728	0.999911	0	0
Sbno1	0.111483	6.59794	0.922046	0.336938	0.999911	0	0
Calb2	0.111447	6.68944	0.634795	0.425602	0.999911	0	0
Trp53bp2	0.111413	4.39953	0.366951	0.544671	0.999911	0	0
Lamp2	0.111271	5.71192	0.690581	0.405967	0.999911	0	0
Wwp1	0.111171	5.03766	0.485427	0.485974	0.999911	0	0
Trip4	0.111166	5.09517	0.534702	0.464637	0.999911	0	0
Hcn1	0.111108	5.00347	0.494678	0.481848	0.999911	0	0
Chfr	0.111055	5.87089	0.684126	0.408169	0.999911	ts_m218	0
Itga8	0.110987	3.45189	0.231912	0.63011	0.999911	0	0
Pkn2	0.110914	4.89362	0.493997	0.48215	0.999911	0	0
Rab33b	0.11083	5.20155	0.544976	0.460378	0.999911	ts_m218	0
Ints7	0.110711	5.39414	0.647285	0.421085	0.999911	0	0
Auts2	0.110642	5.94443	0.696393	0.403998	0.999911	0	0
Phf8	0.110625	4.82868	0.366206	0.54508	0.999911	0	0
Ep400	0.110612	6.80905	1.11891	0.290154	0.999911	0	0
Lmbrd1	0.110338	6.38091	0.814492	0.366795	0.999911	0	0
Jdp2	0.110151	4.0833	0.308671	0.578497	0.999911	ts_m218	0
Tgfbrap1	0.110123	5.9819	0.562962	0.453069	0.999911	0	0
Rasa1	0.110107	5.17833	0.523475	0.469363	0.999911	0	0
Iqcb1	0.109966	3.54937	0.23854	0.625262	0.999911	0	0
Abca3	0.10988	7.52545	1.37269	0.241349	0.999911	0	0
Mcm7	0.10963	5.29785	0.584749	0.444457	0.999911	0	0
Slc25a27	0.109566	4.36678	0.345454	0.556698	0.999911	0	0
Adck1	0.109481	5.6758	0.617145	0.43211	0.999911	0	0
Usp10	0.109454	5.92913	0.638113	0.424395	0.999911	0	0
Rpe	0.109368	4.39229	0.384591	0.535156	0.999911	0	0
Wnt5a	0.109367	4.69589	0.450169	0.502255	0.999911	0	0
Ddx17	0.109347	8.82315	2.05943	0.151267	0.999911	0	0
Ncstn	0.109312	5.74123	0.459254	0.497973	0.999911	0	0
Tmeff2	0.109287	5.17844	0.574647	0.448418	0.999911	0	0
Gsto1	0.109189	5.08618	0.532956	0.465367	0.999911	0	0
Ergic1	0.109154	6.98886	0.903385	0.341876	0.999911	0	0
Fgfr1	0.109093	7.40055	0.799206	0.371331	0.999911	0	0
Wnk1	0.108953	6.96361	0.581247	0.445824	0.999911	0	0
Rexo1	0.108947	5.23271	0.359219	0.54894	0.999911	0	0
Nrbp2	0.108852	5.9365	0.580038	0.446298	0.999911	0	0
Slc25a36	0.108803	5.87456	0.667565	0.413902	0.999911	0	0
Emd	0.108673	4.83021	0.483795	0.486709	0.999911	0	0
Pdia3	0.108625	6.4366	0.722402	0.395357	0.999911	0	0
Prepl	0.108217	7.21215	1.18469	0.276404	0.999911	0	0
Atf7ip	0.108142	6.57066	0.738282	0.390212	0.999911	0	0
Fuca1	0.108114	5.69154	0.553392	0.456935	0.999911	0	0
Slc20a2	0.108094	5.35926	0.527885	0.467497	0.999911	0	0
Bbs2	0.108069	4.03431	0.299759	0.584034	0.999911	0	0
Lman2	0.107993	6.99603	0.595053	0.440472	0.999911	0	0
Clcc1	0.107981	4.39353	0.346058	0.556353	0.999911	0	0
Ehd3	0.107896	6.97809	1.0939	0.295608	0.999911	0	0
Rnf7	0.107831	5.58296	0.609021	0.435157	0.999911	0	0
Gigyf2	0.10781	6.00898	0.66886	0.413449	0.999911	0	0
Agps	0.107776	6.67239	0.657875	0.417311	0.999911	0	0
Akirin2	0.107534	5.85224	0.636171	0.425101	0.999911	0	0
Zfp748	0.10743	2.9476	0.148208	0.700254	0.999911	0	0
Ccdc106	0.107237	3.51337	0.223695	0.636239	0.999911	0	0
Cpne7	0.107091	6.40219	0.433955	0.510054	0.999911	0	0
Rnf41	0.107023	6.99421	1.13987	0.285679	0.999911	ts_m218	0
AI464131	0.106981	5.76229	0.655657	0.418097	0.999911	ts_m218	0
Map3k5	0.106977	4.74145	0.436206	0.508959	0.999911	0	0
Tmem164	0.106905	6.01796	0.73573	0.391032	0.999911	0	0
Xkr4	0.106887	6.92827	1.0974	0.294838	0.999911	0	0
Tmpo	0.106875	6.03625	0.737518	0.390457	0.999911	0	0
Pcdh19	0.106776	7.00558	0.47053	0.492743	0.999911	0	0
Spcs3	0.106741	5.46328	0.464808	0.495385	0.999911	0	0
Mapkbp1	0.106679	6.63306	0.840924	0.359133	0.999911	0	0
Hdac4	0.106464	6.47729	0.952635	0.32905	0.999911	0	0
Znrf1	0.106378	6.3687	0.92854	0.335243	0.999911	0	0
Pdlim5	0.106352	5.46556	0.492227	0.482936	0.999911	0	0
Leo1	0.106335	4.45767	0.371866	0.541989	0.999911	0	0
Fbxo11	0.106201	5.61567	0.50183	0.478697	0.999911	0	0
Tgs1	0.106193	3.77997	0.215748	0.642299	0.999911	0	0
Atrx	0.106175	6.96173	1.01235	0.314339	0.999911	0	0
Coq10a	0.106145	4.86462	0.432989	0.510526	0.999911	0	0
Cnnm1	0.106106	3.91795	0.256374	0.612622	0.999911	0	0
Mrpl37	0.106038	4.95729	0.442548	0.505895	0.999911	0	0
Tbl1xr1	0.105931	6.63159	0.617903	0.431828	0.999911	0	0
Meis2	0.105752	4.77012	0.286918	0.592202	0.999911	0	0
Xpo7	0.105661	6.11893	0.588464	0.443014	0.999911	0	0
Gprc5b	0.105601	5.52013	0.474919	0.490733	0.999911	ts_m218	0
Cep170	0.105507	6.82301	0.625223	0.429113	0.999911	0	0
Ikzf5	0.105406	4.16745	0.28705	0.592117	0.999911	0	0
Cdk5rap3	0.105394	5.80962	0.592884	0.441306	0.999911	0	0
Vps33b	0.10538	4.88766	0.446925	0.503799	0.999911	0	0
Hbegf	0.105335	4.76694	0.416642	0.518617	0.999911	0	0
Bap1	0.105322	7.53008	1.09469	0.295435	0.999911	0	0
Lamp1	0.105311	8.63014	1.2016	0.273003	0.999911	0	0
Elk1	0.105237	5.10859	0.511281	0.474585	0.999911	0	0
Blcap	0.105237	6.30111	0.847738	0.357193	0.999911	0	0
Vars	0.105184	6.08855	0.742002	0.38902	0.999911	0	0
Eif1a	0.105168	5.37156	0.567083	0.45142	0.999911	0	0
Chd2	0.105161	5.70519	0.522488	0.469782	0.999911	0	0
Trim26	0.105156	4.29912	0.338732	0.560562	0.999911	0	0
Ednrb	0.105079	7.07491	0.604344	0.436925	0.999911	0	0
Dtymk	0.10491	5.52045	0.570107	0.450216	0.999911	0	0
Lap3	0.104798	5.7859	0.560664	0.453993	0.999911	0	0
Neu1	0.104785	5.16144	0.459985	0.497631	0.999911	0	0
Dbi	0.104751	7.80537	1.35319	0.244721	0.999911	0	0
Hist1h3e	0.104533	5.28671	0.504461	0.477546	0.999911	0	0
Snx7	0.104475	5.53228	0.573126	0.449019	0.999911	0	0
Pds5a	0.104431	5.85721	0.651043	0.41974	0.999911	0	0
Uso1	0.104415	5.07955	0.460184	0.497538	0.999911	0	0
Mrpl49	0.104211	5.58151	0.344649	0.557158	0.999911	0	0
3110002H16Rik	0.10417	5.28121	0.509878	0.475192	0.999911	0	0
Ate1	0.104134	6.53456	0.915329	0.338704	0.999911	0	0
Col4a5	0.104	5.67053	0.639613	0.423851	0.999911	0	0
Papola	0.103963	6.06141	0.688244	0.406762	0.999911	ts_m218	0
Capza1	0.103805	4.32965	0.337981	0.560997	0.999911	0	0
Rab3b	0.103743	4.81488	0.414262	0.519814	0.999911	0	0
Zfp553	0.103705	4.87462	0.442514	0.505911	0.999911	0	0
Rimbp2	0.103688	6.33725	0.795039	0.372581	0.999911	ts_m218	0
Zbtb7a	0.103556	4.21427	0.315686	0.574212	0.999911	0	0
Mllt1	0.10341	6.0243	0.678054	0.410258	0.999911	0	0
Nol8	0.103287	3.04671	0.153074	0.695615	0.999911	0	0
Vps37b	0.103201	4.17574	0.286651	0.592375	0.999911	0	0
Efnb3	0.103094	7.2716	1.19687	0.273948	0.999911	0	0
Rcan2	0.102831	4.14594	0.2807	0.596243	0.999911	0	0
Vps52	0.102734	5.89578	0.590737	0.442134	0.999911	0	0
Tars2	0.102593	5.55883	0.597704	0.439456	0.999911	0	0
Dcbld2	0.102544	5.14959	0.500734	0.479178	0.999911	ts_m218	0
Creb1	0.1025	5.77486	0.546906	0.459585	0.999911	ts_m218	0
Unc13a	0.102372	8.34315	1.48758	0.222592	0.999911	ts_m218	0
Clmn	0.102198	4.89385	0.416345	0.518766	0.999911	0	0
Zmym2	0.102175	6.13716	0.621134	0.430626	0.999911	0	0
Heca	0.101882	5.23537	0.334214	0.563188	0.999911	0	0
Eif6	0.101851	6.56474	0.700682	0.402555	0.999911	0	0
Epha5	0.10171	8.25937	0.724314	0.394733	0.999911	ts_m218	0
Tgfa	0.101686	5.48461	0.551609	0.457661	0.999911	0	0
Pdzd11	0.101637	4.30984	0.298587	0.58477	0.999911	0	0
Prkaa1	0.101616	4.83109	0.380333	0.537425	0.999911	0	0
Vps13a	0.101471	5.00624	0.393753	0.530333	0.999911	0	0
Armc1	0.101454	6.10851	0.649824	0.420176	0.999911	0	0
2019-03-07	0.101303	6.09947	0.62459	0.429347	0.999911	0	0
Dusp18	0.101176	4.57727	0.361789	0.547514	0.999911	0	0
Capn5	0.101121	6.35615	0.820727	0.364968	0.999911	0	0
Pik3r4	0.101028	5.1107	0.459971	0.497637	0.999911	0	0
Gtf2i	0.101027	7.29891	0.807553	0.368845	0.999911	0	0
Oxsr1	0.10102	6.01619	0.601209	0.438117	0.999911	ts_m218	0
Nup188	0.100843	4.77825	0.388289	0.5332	0.999911	0	0
Cltc	0.10072	9.36044	0.860442	0.353615	0.999911	0	0
Slc6a17	0.100652	7.65854	1.0006	0.317166	0.999911	ts_m218	0
R74862	0.100611	3.9684	0.253297	0.614763	0.999911	0	0
Bcor	0.100608	4.4582	0.314775	0.574765	0.999911	0	0
Dhx33	0.100594	5.56495	0.523236	0.469465	0.999911	0	0
Limd2	0.100542	6.23861	0.587093	0.443545	0.999911	0	0
Sh3gl3	0.10051	5.64123	0.531389	0.466023	0.999911	0	0
Pias2	0.100335	5.68643	0.540111	0.462387	0.999911	0	0
Nr1d1	0.100213	3.24336	0.158278	0.690747	0.999911	0	0
Apoe	0.100196	10.5784	0.822953	0.364318	0.999911	0	0
Tbc1d14	0.100099	5.90141	0.562093	0.453418	0.999911	0	0
Chd6	0.100012	6.52172	0.458071	0.498527	0.999911	0	0
Sh2b3	0.10001	4.09256	0.269965	0.603356	0.999911	0	0
Lrfn5	0.100004	6.6288	0.463383	0.496047	0.999911	0	0
Cnrip1	0.0999877	6.16876	0.631709	0.426729	0.999911	ts_m218	0
Pcgf3	0.0999039	6.67953	0.626548	0.428624	0.999911	0	0
Clk4	0.0998539	5.53362	0.522744	0.469674	0.999911	0	0
Hsd17b7	0.0998313	5.67542	0.489376	0.484206	0.999911	0	0
Upf1	0.0997979	6.03071	0.52924	0.466926	0.999911	0	0
H1f0	0.0997626	6.37081	0.642364	0.422856	0.999911	0	0
Ptpn9	0.099754	5.52052	0.564409	0.452489	0.999911	0	0
Map1lc3b	0.0997342	7.11597	0.814444	0.36681	0.999911	0	0
Brwd1	0.0997125	7.11463	0.979703	0.322272	0.999911	0	0
Dok5	0.0995186	4.73875	0.386239	0.534283	0.999911	0	0
Adcy9	0.099515	6.3293	0.790288	0.374013	0.999911	ts_m218	0
Bsn	0.09934	6.82792	0.789283	0.374317	0.999911	ts_m218	0
Acvr1	0.0992873	4.87788	0.391045	0.531751	0.999911	0	0
Mlxip	0.0992269	4.93837	0.418779	0.517547	0.999911	0	0
Ttll5	0.099197	4.91952	0.407698	0.52314	0.999911	0	0
Pcnx	0.099086	7.6313	1.2514	0.263285	0.999911	0	0
Zcchc14	0.098888	7.02987	0.867161	0.351743	0.999911	0	0
Dock1	0.0987697	5.12946	0.450466	0.502114	0.999911	0	0
Cog6	0.0986544	5.45873	0.485353	0.486008	0.999911	0	0
Chmp6	0.0984448	5.85943	0.607273	0.435817	0.999911	0	0
Sirt7	0.098423	5.30757	0.480823	0.48805	0.999911	0	0
2019-09-09	0.0984	6.59629	0.871531	0.350532	0.999911	0	0
Cbfa2t2	0.0983879	5.78587	0.588736	0.442908	0.999911	0	0
Hist1h2bf	0.0983496	2.65978	0.105249	0.745619	0.999911	0	0
Slc35b2	0.0983445	5.91309	0.518735	0.471382	0.999911	0	0
Ccndbp1	0.0982377	5.64526	0.499438	0.479747	0.999911	0	0
Pgls	0.0982214	6.19434	0.457516	0.498787	0.999911	0	0
Xpo4	0.0981833	4.29034	0.291212	0.589445	0.999911	0	0
Kcnt1	0.098162	5.04246	0.434844	0.509622	0.999911	ts_m218	0
Pmpcb	0.0980332	6.20056	0.682851	0.408607	0.999911	0	0
Dcc	0.0980112	6.17678	0.533905	0.46497	0.999911	0	0
Rai1	0.0978991	5.4455	0.408826	0.522566	0.999911	0	0
Nrp2	0.097839	7.86218	1.25223	0.263127	0.999911	0	0
Wbp1	0.0977751	6.25876	0.434575	0.509752	0.999911	0	0
Zbtb34	0.097728	4.01565	0.248435	0.618179	0.999911	0	0
Slc19a2	0.0976826	3.81375	0.210022	0.64675	0.999911	0	0
Acadvl	0.0976791	5.69862	0.480764	0.488077	0.999911	0	0
Fcho2	0.0976213	3.77313	0.216843	0.641456	0.999911	ts_m218	0
Scn3a	0.0975952	6.66986	0.771138	0.379865	0.999911	0	0
Tnrc18	0.0975871	6.07581	0.40826	0.522854	0.999911	0	0
Myo6	0.0974814	5.91582	0.488421	0.484633	0.999911	0	0
Wdr59	0.097334	5.17493	0.386126	0.534343	0.999911	0	0
Clcn2	0.0973308	5.36454	0.404803	0.524619	0.999911	0	0
Ube2r2	0.0972402	5.62825	0.380758	0.537198	0.999911	0	0
Ube2j2	0.0972213	5.21553	0.392146	0.531173	0.999911	0	0
Acad8	0.0971535	5.27046	0.441719	0.506294	0.999911	0	0
Lsm3	0.0971314	4.12668	0.258395	0.611225	0.999911	0	0
Arid5a	0.097103	3.64162	0.19461	0.659107	0.999911	0	0
Isg20l2	0.0970811	4.95101	0.406827	0.523584	0.999911	0	0
Egfr	0.0969186	4.86737	0.229367	0.631994	0.999911	0	0
Amdhd2	0.0969042	4.70044	0.35926	0.548917	0.999911	0	0
Rnf149	0.0968739	4.28942	0.279887	0.596776	0.999911	0	0
Unc5a	0.0966322	4.98595	0.40685	0.523573	0.999911	0	0
Casc4	0.0966301	6.50646	0.458425	0.498361	0.999911	0	0
Tex261	0.0965747	5.52838	0.487217	0.485172	0.999911	0	0
Fgd4	0.0965665	6.44833	0.448988	0.502816	0.999911	ts_m218	0
Fermt2	0.096372	5.47325	0.503317	0.478046	0.999911	0	bc5_chi_m218
Lrrn1	0.0962036	5.03926	0.413889	0.520002	0.999911	ts_m218	0
Epdr1	0.0960817	5.47108	0.428101	0.512922	0.999911	0	0
Eif3a	0.0960206	6.4811	0.761722	0.38279	0.999911	0	0
Rbbp5	0.0959384	5.36813	0.42491	0.514497	0.999911	0	0
Sgcb	0.0958224	5.02518	0.224346	0.635748	0.999911	0	0
Prr3	0.0957497	4.08394	0.248998	0.617782	0.999911	0	0
Gspt2	0.0956888	4.19409	0.254985	0.613586	0.999911	0	0
Stxbp5	0.0956887	6.48169	0.541346	0.461876	0.999911	ts_m218	0
Dbt	0.0955367	3.67433	0.190701	0.662334	0.999911	0	0
Pak2	0.0954002	5.9961	0.603494	0.437248	0.999911	0	0
Nin	0.0952702	6.09326	0.605468	0.436499	0.999911	0	0
Rhob	0.0952416	7.94139	0.757853	0.384001	0.999911	0	0
Gfod2	0.0952363	5.71167	0.371731	0.542062	0.999911	0	0
4930402H24Rik	0.0949597	7.34073	0.996714	0.318107	0.999911	ts_m218	0
Mbd3	0.0949404	4.72545	0.333511	0.563599	0.999911	0	0
Pcdhb19	0.0949355	4.48077	0.296597	0.586024	0.999911	0	0
Rab28	0.0948804	5.66786	0.521032	0.470402	0.999911	0	0
Fosl2	0.0948568	4.97608	0.372743	0.541513	0.999911	0	0
Sphkap	0.0948373	8.15398	0.63167	0.426743	0.999911	ts_m218	0
Tbcc	0.0947063	5.29238	0.21496	0.642908	0.999911	0	0
Stc2	0.094455	3.41427	0.164228	0.685294	0.999911	0	0
Myo1b	0.0943607	5.82445	0.429577	0.512196	0.999911	0	0
Eif2ak1	0.0943368	5.60396	0.476724	0.48991	0.999911	0	0
Snx18	0.0943004	5.65198	0.51369	0.473546	0.999911	ts_m218	0
Slc25a25	0.0942418	5.84721	0.525735	0.468406	0.999911	0	0
Cdk7	0.0942304	5.9707	0.570839	0.449926	0.999911	0	0
Hspa4l	0.0941821	6.0588	0.45768	0.49871	0.999911	0	0
Gas2l1	0.0940921	4.71241	0.331373	0.564851	0.999911	0	0
Psph	0.093998	5.47834	0.486499	0.485493	0.999911	0	0
Lhfpl2	0.0937304	6.32125	0.67878	0.410007	0.999911	0	0
Spg21	0.0937077	5.85975	0.464202	0.495667	0.999911	0	0
Col4a1	0.0936892	8.13751	0.955376	0.328355	0.999911	0	0
Unc45a	0.0936094	5.99848	0.421904	0.515989	0.999911	0	0
Mrpl54	0.093405	4.72262	0.316566	0.573679	0.999911	0	0
Kcnq5	0.0933613	6.01318	0.42649	0.513716	0.999911	0	0
Qk	0.0933191	8.12338	0.436165	0.508979	0.999911	0	0
Pum1	0.0932359	6.89598	0.735963	0.390957	0.999911	ts_m218	0
Ak3	0.0931339	5.7156	0.518191	0.471615	0.999911	0	0
Lhfp	0.0930951	4.24115	0.254165	0.614158	0.999911	ts_m218	0
Tex264	0.0930044	5.9653	0.380511	0.53733	0.999911	0	0
Gpn3	0.092961	4.35338	0.248086	0.618426	0.999911	0	0
Rusc1	0.092798	6.37559	0.638463	0.424268	0.999911	0	0
Serinc5	0.0925578	6.41991	0.5727	0.449188	0.999911	ts_m218	0
Ptges3	0.0924946	5.96059	0.533578	0.465107	0.999911	0	0
Mib1	0.0923717	8.05836	1.07152	0.300601	0.999911	0	0
Clcn6	0.0923194	6.52269	0.659806	0.416628	0.999911	0	0
Npepps	0.0922754	6.50735	0.496719	0.480945	0.999911	0	0
Wscd1	0.0922584	7.42854	0.762638	0.382504	0.999911	0	0
Grik3	0.0922362	4.84896	0.326614	0.567659	0.999911	ts_m218	0
Nr2f6	0.0920667	4.83009	0.313801	0.575357	0.999911	0	0
Vta1	0.0920543	5.22395	0.407568	0.523206	0.999911	0	0
Heatr6	0.0919997	4.77343	0.291875	0.589022	0.999911	0	0
Idh2	0.0919116	6.55543	0.425063	0.514422	0.999911	0	0
Crip2	0.0918818	6.08199	0.500098	0.479457	0.999911	0	0
Mettl3	0.0916692	4.55702	0.283373	0.594499	0.999911	0	0
Zfp629	0.0915569	5.69641	0.509958	0.475157	0.999911	0	0
Tbl3	0.091503	6.41232	0.567757	0.451151	0.999911	0	0
Ptdss2	0.0914481	4.45807	0.214876	0.642972	0.999911	0	0
Jmy	0.0912664	5.97352	0.55795	0.455087	0.999911	ts_m218	0
Ralb	0.0911498	5.89978	0.553717	0.456803	0.999911	0	0
Lhfpl4	0.0911017	6.19909	0.546843	0.459611	0.999911	0	0
Lrp10	0.0911002	5.48767	0.379232	0.538015	0.999911	0	0
Mars2	0.0910707	5.49545	0.417777	0.518048	0.999911	0	0
Gnb1	0.09096	8.78758	0.709787	0.399515	0.999911	ts_m218	0
Ppt1	0.0909045	5.82471	0.466013	0.494827	0.999911	0	0
Cryzl1	0.090808	5.15345	0.363231	0.546717	0.999911	0	0
Zfp81	0.0907851	3.77156	0.185073	0.66705	0.999911	0	0
Hif1a	0.0905733	6.24757	0.441384	0.506455	0.999911	0	0
Pogz	0.0904416	5.55982	0.458286	0.498426	0.999911	0	0
Tmf1	0.0903888	5.53059	0.44278	0.505784	0.999911	0	0
Zfand3	0.0903152	5.84877	0.514228	0.473314	0.999911	0	0
Taf10	0.0903138	5.19855	0.399009	0.527602	0.999911	0	0
Mrpl19	0.0903076	4.69879	0.302912	0.582062	0.999911	0	0
Zfp68	0.0900621	4.59104	0.254394	0.613998	0.999911	0	0
Cnnm2	0.0900345	4.56317	0.280948	0.596081	0.999911	0	0
Arl6ip5	0.0899587	6.2742	0.566714	0.451568	0.999911	0	0
Nt5dc3	0.0897775	7.34654	0.799675	0.371191	0.999911	0	0
Hps5	0.0896502	4.84969	0.32707	0.56739	0.999911	0	0
0610007P14Rik	0.0896252	6.20112	0.519911	0.47088	0.999911	0	0
Rbm4b	0.089502	4.37803	0.219643	0.639312	0.999911	0	0
Klhl11	0.089351	6.10195	0.517954	0.471716	0.999911	ts_m218	0
Cops2	0.0892749	5.08048	0.242402	0.622477	0.999911	0	0
Tbl1x	0.0891782	6.31561	0.623434	0.429774	0.999911	0	0
Eif4g3	0.0891568	6.40995	0.30941	0.578042	0.999911	0	0
Sdhc	0.0890319	7.01539	0.515781	0.472647	0.999911	0	0
Rer1	0.0888383	6.73319	0.503808	0.477832	0.999911	0	0
Trp53inp2	0.0886877	7.25199	0.679028	0.409922	0.999911	ts_m218	0
Imp3	0.0886779	4.82011	0.294811	0.587154	0.999911	0	0
Ppp1r16a	0.0886174	5.8277	0.443114	0.505623	0.999911	0	0
Med28	0.0886011	5.96653	0.496793	0.480913	0.999911	ts_m218	0
Seh1l	0.0885362	5.09995	0.36293	0.546883	0.999911	0	0
Fbxo22	0.0885263	5.59006	0.409106	0.522424	0.999911	0	0
Apc	0.0885071	8.86019	0.550028	0.458306	0.999911	0	0
Ap4s1	0.088436	4.76985	0.26849	0.604347	0.999911	0	0
Pcnt	0.0883535	4.93631	0.331567	0.564738	0.999911	0	0
Lrp1	0.0882457	9.11496	0.578401	0.44694	0.999911	0	0
Fgfr1op	0.0881847	4.35719	0.24577	0.62007	0.999911	0	0
Gng3	0.0881071	5.28245	0.360064	0.54847	0.999911	ts_m218	0
Zbtb20	0.0880943	8.80396	0.421982	0.51595	0.999911	ts_m218	0
Oxa1l	0.0880857	4.87002	0.306686	0.579721	0.999911	0	0
Polr2c	0.0880741	5.27664	0.379126	0.538071	0.999911	0	0
Plxdc2	0.0880035	4.93264	0.270613	0.602921	0.999911	ts_m218	0
Nsdhl	0.0879901	5.3126	0.249396	0.617501	0.999911	0	0
Pfkfb3	0.0878975	5.06202	0.324559	0.568881	0.999911	0	0
Pcbp1	0.0878355	5.00673	0.30986	0.577766	0.999911	0	0
Ctnnd1	0.0877937	4.2346	0.220776	0.638449	0.999911	0	0
Dhx30	0.087783	7.47318	0.730536	0.39271	0.999911	0	0
Lrba	0.0877404	5.68754	0.348867	0.554755	0.999911	0	0
Clstn2	0.0876008	7.45118	0.644035	0.422253	0.999911	0	0
2610008E11Rik	0.0875986	3.90823	0.169759	0.680326	0.999911	0	0
Wdr19	0.0875958	5.10235	0.359488	0.548791	0.999911	0	0
Psmd9	0.087555	4.87161	0.317465	0.573135	0.999911	0	0
Afg3l2	0.087525	5.58974	0.452892	0.500965	0.999911	0	0
Stard3nl	0.0875111	6.23921	0.532692	0.465477	0.999911	0	0
Grasp	0.0874655	3.76296	0.167812	0.682063	0.999911	0	0
Ogdhl	0.0874488	5.51366	0.426599	0.513662	0.999911	0	0
Ankrd12	0.0874245	5.92318	0.391409	0.53156	0.999911	0	0
H2afz	0.087321	6.97451	0.667047	0.414083	0.999911	0	0
Ncapd3	0.0870451	5.0773	0.347209	0.555697	0.999911	0	0
Vsnl1	0.0870443	6.57154	0.519318	0.471133	0.999911	0	0
Clpp	0.0870128	5.28231	0.312254	0.5763	0.999911	0	0
Cdc27	0.0869465	5.69063	0.301565	0.582903	0.999911	0	0
Ap2m1	0.0869285	7.55591	0.718209	0.396732	0.999911	0	0
Slc15a4	0.0869129	5.38243	0.386736	0.53402	0.999911	0	0
Ppm1h	0.0868437	7.0013	0.65546	0.418167	0.999911	0	0
Gfap	0.0867992	9.21213	0.707747	0.400193	0.999911	0	0
Cpd	0.0867874	7.86564	0.954683	0.32853	0.999911	0	0
Cacng4	0.0867684	5.05787	0.308931	0.578337	0.999911	0	0
Gm1673	0.0867622	5.92003	0.457138	0.498965	0.999911	0	0
Morc3	0.086703	5.51173	0.196187	0.657817	0.999911	0	0
Fzd1	0.086654	5.46195	0.39673	0.528783	0.999911	0	0
Sox6	0.0866375	4.88683	0.311064	0.577028	0.999911	ts_m218	0
Dck	0.0865698	4.86427	0.256529	0.612515	0.999911	0	0
Rnf114	0.0865427	5.22139	0.3713	0.542296	0.999911	ts_m218	0
Slc4a7	0.0864565	6.26421	0.543018	0.461185	0.999911	0	0
Lgr4	0.0864539	5.20869	0.315125	0.574552	0.999911	ts_m218	0
Hsd17b12	0.0864372	6.10747	0.510329	0.474996	0.999911	0	0
Creld2	0.0864351	4.64622	0.275567	0.599622	0.999911	0	0
BC005537	0.0863149	6.99481	0.529079	0.466994	0.999911	ts_m218	0
Klf13	0.0862844	6.44229	0.45737	0.498856	0.999911	0	0
Akap12	0.0862245	5.23788	0.296308	0.586206	0.999911	0	0
Ogfrl1	0.0860569	5.96331	0.464299	0.495622	0.999911	0	0
Spire1	0.0860032	6.91968	0.478452	0.489124	0.999911	ts_m218	0
Atg4b	0.085813	6.15268	0.33211	0.564419	0.999911	0	0
Rps26	0.0858055	6.03911	0.523063	0.469538	0.999911	0	0
Max	0.085748	4.83493	0.2929	0.588368	0.999911	0	0
0610009O20Rik	0.0857275	5.16723	0.321489	0.570714	0.999911	0	0
Mtmr9	0.0856922	6.33306	0.535432	0.464332	0.999911	0	0
Tardbp	0.085636	6.22236	0.340217	0.559704	0.999911	0	0
Btbd11	0.0856279	3.93424	0.183349	0.668511	0.999911	0	0
Ttc9c	0.0856139	5.54061	0.378331	0.538498	0.999911	0	0
Zxdc	0.0855725	5.36833	0.370612	0.542671	0.999911	0	0
Tmem68	0.0855098	5.99423	0.372031	0.541899	0.999911	0	0
Ubtd2	0.0855041	3.65851	0.151307	0.69729	0.999911	0	0
Sphk2	0.0854907	5.16319	0.345621	0.556602	0.999911	0	0
Nit1	0.085294	5.03476	0.313707	0.575414	0.999911	0	0
Eif4a3	0.0852765	6.43407	0.578623	0.446852	0.999911	0	0
Gria2	0.085227	8.80366	0.474806	0.490784	0.999911	ts_m218	bc5_chi_m218
Traip	0.0850693	4.74955	0.241321	0.623254	0.999911	ts_m218	0
Brd4	0.0849643	4.64145	0.266723	0.605539	0.999911	0	0
Abcc5	0.0848592	6.85017	0.496469	0.481056	0.999911	0	0
2019-03-06	0.084746	8.46822	1.13957	0.285743	0.999911	0	0
Rab10	0.0847322	7.68257	0.249049	0.617746	0.999911	0	0
Anks1	0.084722	5.5506	0.408295	0.522836	0.999911	0	0
Klhl2	0.0846727	8.37003	0.422502	0.515691	0.999911	0	0
Aqr	0.0846368	5.46052	0.387636	0.533545	0.999911	0	0
Tpd52	0.0843883	5.09549	0.26741	0.605074	0.999911	0	0
Ptov1	0.0843069	6.13977	0.341992	0.558682	0.999911	0	0
Pccb	0.0842573	5.81533	0.384967	0.534957	0.999911	0	0
Rnd1	0.0838013	5.46466	0.330534	0.565345	0.999911	0	0
Mapk3	0.0837497	5.40895	0.346104	0.556327	0.999911	0	0
Fbxo3	0.0836447	6.63579	0.451152	0.501788	0.999911	0	0
Sema6b	0.0832645	7.0619	0.583282	0.445029	0.999911	ts_m218	0
Limk1	0.0832565	5.48359	0.359869	0.548579	0.999911	0	0
Klhdc8a	0.0832361	4.58946	0.196132	0.657861	0.999911	ts_m218	0
Prdx6	0.0831739	7.58217	0.456416	0.499304	0.999911	0	0
Ubxn6	0.083172	6.76627	0.580956	0.445938	0.999911	0	0
Ctsd	0.0831102	8.73402	0.318316	0.572622	0.999911	0	0
Fbxo6	0.0830993	4.13789	0.175642	0.675145	0.999911	0	0
Tm9sf1	0.0830801	4.88061	0.290116	0.590146	0.999911	0	0
Fchsd2	0.0830766	5.79472	0.37002	0.542993	0.999911	ts_m218	0
Erlin2	0.0830556	6.31318	0.537778	0.463355	0.999911	0	0
Tmem64	0.0830405	5.07294	0.311571	0.576718	0.999911	0	0
Rbm4	0.0826585	3.65086	0.143329	0.704994	0.999911	0	0
St7	0.0825751	5.11459	0.246507	0.619546	0.999911	0	0
Pigo	0.0825547	4.51245	0.233749	0.628758	0.999911	0	0
Hnrnph1	0.0824485	6.8736	0.394418	0.529986	0.999911	0	0
Chd7	0.0824461	4.89704	0.21698	0.641351	0.999911	0	0
Mthfd1	0.0823802	5.66425	0.359826	0.548603	0.999911	0	0
Gtf2a1	0.0823739	5.20837	0.33271	0.564067	0.999911	ts_m218	0
Pcdhga12	0.082313	4.37478	0.204428	0.65117	0.999911	0	0
Utp14b	0.0823099	3.75316	0.136486	0.711799	0.999911	0	0
Ptcd1	0.0822694	4.68675	0.253369	0.614713	0.999911	0	0
Exoc4	0.0822274	6.93603	0.438803	0.507701	0.999911	0	0
Myo16	0.0822225	7.06301	0.671061	0.412682	0.999911	ts_m218	0
Cntn6	0.0822146	3.97358	0.150338	0.698213	0.999911	0	0
Ftl1	0.0821818	7.23375	0.42526	0.514324	0.999911	0	0
Adam15	0.0821676	5.57405	0.297515	0.585445	0.999911	0	0
Gsg1l	0.0820803	4.46382	0.190535	0.662471	0.999911	0	0
Hnrnpa3	0.0820596	4.72491	0.256811	0.61232	0.999911	0	0
Pts	0.0820184	4.90311	0.253163	0.614857	0.999911	0	0
Dopey1	0.0819904	6.00714	0.435185	0.509456	0.999911	0	0
Tex10	0.0819886	4.8264	0.23421	0.62842	0.999911	0	0
Bach2	0.081892	4.16495	0.190299	0.662668	0.999911	0	0
Itpkc	0.0818775	3.21369	0.105223	0.74565	0.999911	ts_m218	0
Sema5b	0.0818138	4.87072	0.178177	0.672945	0.999911	0	0
Mga	0.0818133	6.11516	0.248938	0.617824	0.999911	0	0
Mycbp2	0.0817795	8.3127	0.391897	0.531304	0.999911	0	0
Cdh13	0.0817257	6.03081	0.426939	0.513495	0.999911	0	0
Arid4b	0.0816336	4.70968	0.182809	0.66897	0.999911	ts_m218	0
Neto2	0.0815997	6.60289	0.424625	0.514638	0.999911	0	0
Lgals1	0.0815034	4.47276	0.217209	0.641175	0.999911	0	0
Tcf4	0.0814771	8.75502	0.546997	0.459547	0.999911	ts_m218	0
Megf11	0.0814592	4.70109	0.242914	0.62211	0.999911	0	0
Setbp1	0.0814532	5.72465	0.309198	0.578173	0.999911	ts_m218	0
Tm9sf4	0.0813871	5.80862	0.432261	0.510882	0.999911	0	0
Fut8	0.0812779	5.85219	0.346668	0.556006	0.999911	0	0
Rbm28	0.0812214	5.39352	0.333131	0.563821	0.999911	0	0
Scyl2	0.0809931	5.34993	0.328085	0.566789	0.999911	0	0
Rabgef1	0.0807017	4.63545	0.237235	0.62621	0.999911	0	0
Hist1h2ae	0.0806593	2.82052	0.0814507	0.775341	0.999911	0	0
Lpcat1	0.0805871	7.5836	0.659214	0.416838	0.999911	0	0
Prmt5	0.0805496	6.58421	0.511558	0.474465	0.999911	0	0
Usf2	0.0805243	5.02928	0.261676	0.608971	0.999911	0	0
Sap30bp	0.0805039	6.21516	0.439537	0.507346	0.999911	0	0
Hps3	0.0803749	5.098	0.285886	0.592869	0.999911	0	0
Kcnc3	0.080272	3.98776	0.165401	0.684232	0.999911	0	0
Cggbp1	0.0802073	6.23012	0.316061	0.573984	0.999911	0	0
Rpl17	0.0801202	7.28817	0.544822	0.460441	0.999911	0	0
Med24	0.0801156	5.98198	0.412409	0.520749	0.999911	0	0
Zfp771	0.0801091	5.15903	0.292538	0.588599	0.999911	0	0
Mkl1	0.0801088	4.4309	0.203828	0.651648	0.999911	0	0
Ckap5	0.0800236	6.87191	0.312772	0.575984	0.999911	0	0
D430042O09Rik	0.0799941	5.4289	0.302779	0.582146	0.999911	0	0
Dhx9	0.0799342	7.06213	0.605669	0.436423	0.999911	0	0
Nbl1	0.0798779	6.01375	0.26349	0.607732	0.999911	0	0
Ruvbl1	0.0798199	4.87304	0.243533	0.621666	0.999911	0	0
Ing1	0.079774	4.29354	0.19265	0.66072	0.999911	0	0
Fbxl3	0.0797175	5.91408	0.332989	0.563904	0.999911	0	0
Scmh1	0.0797125	4.70672	0.231594	0.630345	0.999911	0	0
Tsc22d1	0.0797099	8.82124	0.751295	0.386066	0.999911	0	bc5_chi_m218
Hace1	0.0796895	5.27536	0.306556	0.579801	0.999911	0	0
Zfp46	0.0795836	6.41262	0.511976	0.474285	0.999911	0	0
Grwd1	0.0794944	5.30046	0.321768	0.570547	0.999911	0	0
Slc45a4	0.0793341	5.46257	0.348245	0.555108	0.999911	0	0
Ddx6	0.079257	7.0754	0.653778	0.418765	0.999911	ts_m218	0
Akap9	0.0791413	6.35312	0.198424	0.655996	0.999911	0	0
Por	0.0790748	5.77913	0.324822	0.568724	0.999911	0	0
Atp13a3	0.0790183	6.40309	0.329619	0.565883	0.999911	0	0
Nr4a3	0.0790102	6.83916	0.415376	0.519253	0.999911	0	0
Slc30a5	0.0787483	5.85476	0.412283	0.520813	0.999911	0	0
Akap10	0.0786998	4.9502	0.213297	0.644195	0.999911	0	0
Osbpl10	0.07867	3.56571	0.122796	0.726022	0.999911	0	0
Utp18	0.0785775	5.44587	0.304765	0.58091	0.999911	0	0
Rusc2	0.0784974	6.83755	0.397103	0.528589	0.999911	0	0
Zfp358	0.0784262	4.15521	0.170843	0.679364	0.999911	0	0
Nfyc	0.0784147	3.98793	0.158437	0.690599	0.999911	0	0
Arl15	0.0784133	5.45846	0.319349	0.571999	0.999911	0	0
Lrrc7	0.0783654	6.70722	0.325663	0.568224	0.999911	ts_m218	0
Cav2	0.0782305	4.93286	0.2267	0.633981	0.999911	0	0
Puf60	0.0782139	7.62485	0.560804	0.453936	0.999911	0	0
Mrpl51	0.0781262	5.43685	0.30924	0.578147	0.999911	0	0
Npc2	0.0781166	6.54715	0.470229	0.492882	0.999911	0	0
Dynlrb1	0.0779857	5.66352	0.332679	0.564086	0.999911	0	0
Chd1	0.0779751	5.14133	0.252516	0.615309	0.999911	0	0
Traf7	0.0779653	6.26743	0.369839	0.543092	0.999911	0	0
Msi2	0.0778795	6.47913	0.274261	0.600487	0.999911	ts_m218	0
Crot	0.0778308	5.01054	0.256593	0.612471	0.999911	0	0
Crtc1	0.0778301	5.83636	0.361417	0.54772	0.999911	0	0
Ift140	0.0777007	6.33963	0.454133	0.500379	0.999911	0	0
Hsp90b1	0.0776854	6.1886	0.221943	0.637564	0.999911	0	0
Dock4	0.0776696	7.09845	0.532437	0.465584	0.999911	0	0
Aak1	0.0776644	7.82338	0.486723	0.485393	0.999911	0	0
Sirt3	0.0776636	5.49929	0.194334	0.659334	0.999911	0	0
Abca2	0.0776271	7.00225	0.479004	0.488874	0.999911	0	0
Ets2	0.0774823	4.78291	0.230598	0.631081	0.999911	0	0
Nr2f1	0.0773201	5.70874	0.304696	0.580953	0.999911	0	0
Eif5a	0.0772906	7.8294	0.516644	0.472277	0.999911	0	0
Elp4	0.077282	4.36044	0.188376	0.664272	0.999911	0	0
Fstl1	0.0772539	6.67143	0.505543	0.477075	0.999911	0	0
Sdf2	0.0772	5.95791	0.412387	0.520761	0.999911	0	0
Letmd1	0.0771706	6.10526	0.43474	0.509672	0.999911	0	0
Ptprd	0.0769798	6.88938	0.476547	0.489991	0.999911	0	0
Dkc1	0.0769351	3.2646	0.0986615	0.753442	0.999911	0	0
Impad1	0.0769112	8.02168	0.48319	0.486981	0.999911	ts_m218	0
Vps4a	0.076809	6.97437	0.526889	0.467918	0.999911	0	0
Nedd9	0.0767112	4.97575	0.248128	0.618396	0.999911	0	0
Unc13b	0.0767013	6.17896	0.407074	0.523459	0.999911	0	0
Scrib	0.0766749	5.7481	0.36737	0.544441	0.999911	0	0
Dhdds	0.0766494	6.00447	0.292755	0.588461	0.999911	0	0
Nrf1	0.076626	5.41268	0.250555	0.616685	0.999911	0	0
Zfp623	0.0766226	4.27299	0.169985	0.680125	0.999911	0	0
Mapk1	0.0766171	8.48752	0.749809	0.386537	0.999911	0	0
Sec14l1	0.0765892	7.18204	0.35241	0.552752	0.999911	ts_m218	0
Scaper	0.076529	5.20448	0.272233	0.601837	0.999911	0	0
Map2k7	0.076519	5.22793	0.268684	0.604216	0.999911	0	0
Agpat3	0.0764659	7.63226	0.385286	0.534788	0.999911	ts_m218	0
Hs2st1	0.0762925	6.50534	0.506699	0.476571	0.999911	ts_m218	0
Skiv2l2	0.076273	5.19297	0.218622	0.640092	0.999911	0	0
Noc3l	0.0762443	4.12741	0.133215	0.715121	0.999911	0	0
Usp11	0.0761637	6.88989	0.563397	0.452895	0.999911	0	0
2810428I15Rik	0.0760756	5.356	0.235264	0.627648	0.999911	0	0
Prkcsh	0.076067	6.27412	0.222308	0.637287	0.999911	0	0
Ski	0.0760016	7.24886	0.478712	0.489006	0.999911	ts_m218	bc5_chi_m218
Cisd2	0.075972	5.00572	0.218184	0.640427	0.999911	0	0
Mical3	0.0759293	6.74054	0.534316	0.464798	0.999911	0	0
Gabra4	0.0756832	5.06244	0.228584	0.632576	0.999911	0	0
Tfrc	0.0755836	7.03938	0.418178	0.517848	0.999911	0	0
Ube2g1	0.0755727	5.81312	0.342531	0.558372	0.999911	0	0
Taf2	0.075561	5.92929	0.380789	0.537181	0.999911	0	0
Fstl4	0.0754695	2.86586	0.0730518	0.786944	0.999911	0	0
Gab2	0.0753688	4.97538	0.248193	0.61835	0.999911	0	0
Cyfip1	0.0753407	7.15571	0.477722	0.489456	0.999911	0	0
Adarb2	0.0752662	4.90318	0.155544	0.693292	0.999911	0	0
Arf4	0.075157	6.53798	0.468991	0.493452	0.999911	0	0
Vstm2l	0.0750377	5.06522	0.223924	0.636066	0.999911	0	0
Hist1h3a	0.0750359	4.39548	0.15974	0.689396	0.999911	0	0
Olfm1	0.0748307	8.35578	0.597249	0.43963	0.999911	0	0
Wdfy3	0.0748127	7.66272	0.630786	0.427067	0.999911	0	0
Zfp169	0.0748005	4.06392	0.148246	0.700217	0.999911	0	0
Psmf1	0.0747675	4.91969	0.229932	0.631574	0.999911	0	0
Tm9sf2	0.0747195	6.65276	0.503388	0.478015	0.999911	0	0
Eif2ak4	0.0746873	4.79666	0.189893	0.663006	0.999911	0	0
Nhsl1	0.0746628	5.88866	0.330325	0.565468	0.999911	0	0
Trappc4	0.0744848	6.19412	0.371714	0.542072	0.999911	0	0
Pank4	0.0744324	5.27065	0.264251	0.607215	0.999911	0	0
Irs2	0.0744008	4.71463	0.178926	0.672298	0.999911	0	0
Slc7a5	0.0742361	6.13785	0.325883	0.568093	0.999911	0	bc5_chi_m218
Cdkl2	0.0741648	6.16303	0.330559	0.56533	0.999911	0	0
Pacs2	0.0741492	6.98632	0.566206	0.451771	0.999911	0	0
Egr1	0.0741482	2.7765	0.0669722	0.795797	0.999911	0	0
Rab14	0.0739321	6.88405	0.471674	0.492218	0.999911	0	0
Atp11c	0.07386	4.48496	0.184228	0.667765	0.999911	0	0
Tet2	0.0738167	5.42072	0.22266	0.63702	0.999911	0	0
Mgat5b	0.0737191	5.67595	0.282165	0.595286	0.999911	0	0
Cnn3	0.0736565	5.96418	0.358457	0.549364	0.999911	0	0
Evi5l	0.0736257	7.08704	0.579021	0.446696	0.999911	0	0
Zfp13	0.073594	5.11415	0.193078	0.660367	0.999911	0	0
Nploc4	0.0735362	6.50313	0.368941	0.543582	0.999911	0	0
Atg2a	0.0735153	5.38573	0.26305	0.608033	0.999911	0	0
Zfp428	0.0735	5.89693	0.27326	0.601153	0.999911	0	0
Astn1	0.0734149	8.13345	0.572742	0.449171	0.999911	0	0
Vcl	0.0733005	5.20383	0.240672	0.623721	0.999911	0	0
Cpeb4	0.0732363	6.76525	0.258149	0.611395	0.999911	0	0
Cln8	0.0732354	5.12986	0.240113	0.624124	0.999911	0	0
Zbtb1	0.0731168	3.64819	0.112176	0.73768	0.999911	0	0
Ppp1r14b	0.0730717	5.0251	0.175129	0.675593	0.999911	0	0
Rassf1	0.0730594	3.50076	0.101516	0.750017	0.999911	0	0
Usp48	0.07297	6.51615	0.429401	0.512283	0.999911	0	0
Disp2	0.0728789	7.41667	0.55742	0.455301	0.999911	0	0
Dgke	0.0728747	6.50384	0.380047	0.537578	0.999911	0	0
Hecw1	0.0728549	7.19343	0.519151	0.471204	0.999911	ts_m218	0
Psmd11	0.0728509	4.92424	0.200204	0.654556	0.999911	0	0
1700123O20Rik	0.0728296	5.01842	0.224768	0.635431	0.999911	0	0
Senp5	0.0727773	5.51416	0.292506	0.588619	0.999911	0	0
Slitrk1	0.0726977	5.55935	0.261259	0.609257	0.999911	0	0
Mrpl46	0.0726672	4.86082	0.217184	0.641194	0.999911	0	0
Uqcrfs1	0.0726602	7.17864	0.42228	0.515802	0.999911	0	0
Atp6v0d1	0.0726307	7.12327	0.559211	0.454578	0.999911	0	0
Frmpd4	0.0725846	5.49347	0.288563	0.591143	0.999911	ts_m218	0
Golph3	0.072517	5.82907	0.34178	0.558803	0.999911	0	0
Abca1	0.072511	7.28107	0.321171	0.570905	0.999911	0	0
Foxo6	0.0724612	5.0351	0.20295	0.65235	0.999911	0	0
Fto	0.0724555	6.40811	0.402147	0.525983	0.999911	0	0
Eaf1	0.0724252	4.47048	0.175008	0.675699	0.999911	0	0
Ccm2	0.0723495	5.81424	0.326743	0.567583	0.999911	0	0
Zdhhc7	0.0722746	5.65433	0.317987	0.57282	0.999911	0	0
Lats1	0.0722498	6.31859	0.343835	0.557624	0.999911	0	0
Lrp8	0.0722236	6.32694	0.331905	0.56454	0.999911	0	0
Sltm	0.0722103	4.51316	0.133715	0.714611	0.999911	0	0
Zfp41	0.0721959	5.3425	0.221193	0.638132	0.999911	0	0
Smarcd1	0.0720892	5.09698	0.205053	0.650673	0.999911	0	0
Jund	0.0720003	5.86251	0.341398	0.559023	0.999911	0	0
Mfge8	0.0718331	7.99871	0.299309	0.584316	0.999911	0	0
Mphosph8	0.0717988	3.3064	0.0885155	0.766073	0.999911	0	0
Paip2b	0.0717896	6.22156	0.355701	0.550904	0.999911	0	0
Gmcl1	0.071677	5.02788	0.173221	0.677265	0.999911	0	0
Tef	0.0715848	8.01087	0.552879	0.457144	0.999911	0	0
Cpne2	0.0715686	5.98079	0.264436	0.607089	0.999911	0	0
Slc6a11	0.0715267	7.50281	0.44394	0.505227	0.999911	0	0
Ibtk	0.0714581	5.17089	0.233165	0.629187	0.999911	0	0
Pcdhb7	0.0714381	3.85276	0.116718	0.732621	0.999911	0	0
Rev1	0.071314	5.22811	0.237041	0.626352	0.999911	0	0
Cs	0.0713014	8.27259	0.502867	0.478243	0.999911	0	0
Chn2	0.0712621	4.63654	0.185144	0.666989	0.999911	0	0
Icmt	0.0712094	6.1555	0.329998	0.56566	0.999911	0	0
Smc6	0.0711177	4.19759	0.142389	0.705917	0.999911	0	0
Rnf216	0.0708995	5.72399	0.30916	0.578196	0.999911	0	0
6030419C18Rik	0.0708939	6.21238	0.344853	0.557041	0.999911	0	0
Usp40	0.0708744	4.76439	0.189458	0.663368	0.999911	0	0
Elavl1	0.0707723	6.77861	0.447297	0.503621	0.999911	0	0
St6gal2	0.0707118	5.23451	0.188434	0.664223	0.999911	0	0
Foxk1	0.0707004	4.90315	0.173227	0.677259	0.999911	0	0
Rps27a	0.0706973	6.96146	0.443864	0.505263	0.999911	0	0
Ikbkg	0.0706184	6.16305	0.375742	0.539891	0.999911	0	0
Arhgef18	0.0706182	6.29036	0.25151	0.616014	0.999911	0	0
Wdr6	0.070476	8.86455	0.673684	0.41177	0.999911	0	0
Snrpb	0.0704489	6.72074	0.389951	0.532325	0.999911	0	0
Adal	0.0703872	4.20625	0.142881	0.705433	0.999911	0	0
Slc36a1	0.0703277	5.37711	0.194435	0.659251	0.999911	0	0
Insig1	0.0702814	6.54555	0.287619	0.59175	0.999911	0	0
Chst1	0.0702276	6.2572	0.341284	0.559089	0.999911	0	0
Tmem208	0.0701298	5.54223	0.276695	0.598875	0.999911	0	0
Zfp131	0.0700825	4.66168	0.151559	0.69705	0.999911	0	0
Cry2	0.0700737	5.82191	0.309367	0.578069	0.999911	0	0
Hmgcs1	0.0700337	9.11261	0.396517	0.528893	0.999911	0	0
Ier5	0.0698033	6.19282	0.177006	0.673959	0.999911	0	0
Zfp777	0.0698022	4.85877	0.178706	0.672488	0.999911	0	0
Mthfr	0.069742	5.068	0.219708	0.639262	0.999911	0	0
Stt3a	0.0697253	6.02857	0.341045	0.559227	0.999911	0	0
Rtn3	0.0696576	8.6003	0.568498	0.450856	0.999911	ts_m218	bc5_chi_m218
Foxk2	0.0696307	7.17564	0.390797	0.531881	0.999911	0	0
Map1lc3a	0.0696232	7.56752	0.548835	0.458794	0.999911	0	0
Scarb2	0.0696169	7.98114	0.647302	0.421079	0.999911	0	0
Stard7	0.0695854	8.1622	0.67134	0.412585	0.999911	0	0
Pdcd7	0.0694972	4.84267	0.1954	0.65846	0.999911	0	0
Glrb	0.0694553	6.8058	0.3839	0.535523	0.999911	0	0
Lrig1	0.0694033	6.78767	0.442417	0.505958	0.999911	0	0
Rasal2	0.0693684	5.67221	0.216419	0.641782	0.999911	0	0
Vps13d	0.0693524	7.95053	0.413355	0.520272	0.999911	0	0
Dmtf1	0.0692966	5.28174	0.22716	0.633638	0.999911	0	0
Vti1a	0.0692623	5.71838	0.240422	0.623901	0.999911	0	0
Ankrd44	0.0692589	4.37466	0.142202	0.706101	0.999911	ts_m218	0
Atg9a	0.0692455	5.56851	0.256185	0.612754	0.999911	0	0
Strbp	0.0692233	7.90199	0.407259	0.523364	0.999911	0	0
Acbd5	0.0692169	5.13773	0.218331	0.640314	0.999911	0	0
Nfib	0.0691799	8.35466	0.606874	0.435967	0.999911	0	0
Phkg2	0.0691787	4.2883	0.1414	0.706893	0.999911	0	0
Slc35e3	0.0690353	3.75644	0.107732	0.742741	0.999911	0	0
Hist1h3h	0.0690035	3.44629	0.0862161	0.769044	0.999911	0	0
Eif4enif1	0.0689976	5.63673	0.280735	0.59622	0.999911	0	0
Pank2	0.0689338	6.02764	0.260054	0.610083	0.999911	0	0
Tnpo3	0.0687758	6.61278	0.332576	0.564146	0.999911	0	0
Kctd18	0.0687513	4.72725	0.182611	0.669139	0.999911	0	0
Maoa	0.0686791	5.97047	0.285044	0.593414	0.999911	0	0
Xbp1	0.0686197	6.40616	0.291121	0.589503	0.999911	0	0
Vgll4	0.0685817	5.55522	0.242226	0.622603	0.999911	0	0
Idh3g	0.0685298	6.22489	0.25979	0.610265	0.999911	0	0
Lrch3	0.0682606	5.80626	0.271404	0.602392	0.999911	0	0
Hbp1	0.0682417	5.67717	0.282067	0.59535	0.999911	0	0
Mrpl28	0.0680591	6.5904	0.313992	0.575241	0.999911	0	0
Prkar1b	0.068007	8.29997	0.522696	0.469694	0.999911	0	0
Rgs9	0.0679012	4.14683	0.128677	0.719807	0.999911	0	0
Rasa2	0.0678798	5.84779	0.245631	0.620168	0.999911	0	0
Pus7	0.0678662	4.78947	0.178274	0.672861	0.999911	0	0
Agpat4	0.0677281	5.75747	0.260733	0.609617	0.999911	0	0
Rab22a	0.067695	5.59259	0.265784	0.606174	0.999911	0	0
Atp6ap1	0.0676813	7.61372	0.481086	0.487931	0.999911	0	0
Hspe1	0.0675706	5.66046	0.278536	0.597662	0.999911	0	0
Hexa	0.0675055	5.62153	0.270884	0.602739	0.999911	0	0
Mrps9	0.0674516	5.04956	0.189018	0.663735	0.999911	0	0
Dusp4	0.0673882	5.41233	0.22819	0.632869	0.999911	0	0
Ypel3	0.0673085	4.9769	0.193252	0.660223	0.999911	0	0
Guf1	0.0672626	5.18007	0.165479	0.684161	0.999911	0	0
Smarcad1	0.0672398	5.20197	0.198185	0.65619	0.999911	0	0
Arpc4	0.0671804	7.71497	0.384412	0.535252	0.999911	0	0
H2afx	0.0671561	4.68379	0.137608	0.710671	0.999911	0	0
Mvd	0.0671056	6.11944	0.281491	0.595726	0.999911	0	0
Amotl1	0.0670654	5.78718	0.284867	0.593529	0.999911	0	0
Ap1g1	0.0670499	6.6132	0.386435	0.534179	0.999911	0	0
9530068E07Rik	0.0669885	6.38908	0.311648	0.576671	0.999911	0	0
Lss	0.066824	6.26682	0.349608	0.554335	0.999911	0	0
Pea15a	0.0668097	8.13278	0.651731	0.419495	0.999911	0	0
Slc25a39	0.0668097	5.69317	0.272187	0.601868	0.999911	0	0
Txndc17	0.0667313	5.00798	0.197293	0.656915	0.999911	0	0
Tmem30a	0.0666975	7.01131	0.218207	0.64041	0.999911	0	0
Ankrd28	0.0666379	5.8637	0.197038	0.657122	0.999911	0	0
Rps6kb1	0.0665995	4.97673	0.130757	0.717648	0.999911	ts_m218	0
Rb1cc1	0.0664505	5.8013	0.220922	0.638338	0.999911	0	0
Rps15	0.066442	7.60242	0.36106	0.547918	0.999911	0	0
Sri	0.066404	5.70368	0.22411	0.635926	0.999911	0	0
Stag2	0.0663483	5.52728	0.244974	0.620637	0.999911	0	0
Agl	0.0662938	5.52496	0.235713	0.62732	0.999911	0	0
[truncated: 4,786 more rows]

## Sheet: 1B miR-218-2 hemi vs wt
	logFC	logCPM	LR	PValue	FDR	m218_ts	m218_chiBC5		Legend
Gm13394	9.1285	3.15206	246.442	1.54955e-55	2.58176e-52	0	0		logFC	log2 fold-change (VGluT2+ cells compared to VGAT+ cells)
Gm15920	8.01099	2.78387	130.603	3.02388e-30	3.20614e-27	0	0		logCPM	log2 counts per million
Rps3a3	7.46837	3.84953	249.979	2.62421e-56	5.10103e-53	0	0		LR	likelihood ratio
Gm8730	6.75983	4.15141	269.188	1.7053e-60	3.97778e-57	0	0		Pvalue	Unadjusted p-value
Tpm3-rs7	5.69029	4.13852	269.513	1.44911e-60	3.97778e-57	0	0		FDR	FDR corrected p-value
Tuba1c	4.51726	4.01318	198.286	4.94056e-45	6.40242e-42	0	0		m218_ts	Predicted miR-218 target (from TargetScan)
Tdpx-ps1	4.40352	2.72974	88.6209	4.782e-21	3.88484e-18	0	0		m218_chiBC5	miR-218 target from HITS-CLIP
Rpl3-ps1	4.2808	4.24175	227.759	1.83683e-51	2.67788e-48	0	0
Cwc22	3.37332	5.9746	296.619	1.79618e-66	1.04744e-62	0	0
Rprl3	3.21492	7.25013	4.80596	0.0283615	0.200892	0	0
Gm12892	3.08238	3.49834	100.305	1.3063e-23	1.26961e-20	0	0
Hddc3	2.4844	3.2417	57.287	3.76639e-14	1.68952e-11	0	0
Gm5436	2.47827	2.38521	38.1677	6.49196e-10	1.28332e-07	0	0
Pla2g4e	2.20951	3.13095	56.3094	6.19199e-14	2.57918e-11	0	0
Nts	2.16203	2.85203	43.4011	4.4594e-11	1.08354e-08	0	0
Folh1	2.07891	2.89667	35.8818	2.09662e-09	3.81514e-07	0	0
Lgr6	1.76847	2.36151	22.2908	2.34328e-06	0.00017632	0	0
Gm24693	1.72656	3.0539	32.8232	1.00932e-08	1.54891e-06	0	0
Dcn	1.72487	4.44147	69.1991	8.90102e-17	4.71875e-14	0	0
Gm25813	1.71884	3.69608	18.6476	1.57249e-05	0.000955204	0	0
Prph	1.68607	2.534	22.9682	1.64701e-06	0.000131569	0	0
Nxph3	1.66419	3.25144	36.4125	1.59674e-09	2.956e-07	0	0
Scg5	1.65704	8.24587	387.682	2.64615e-86	3.08621e-82	0	0
Mrpl14	1.59902	3.37551	37.7688	7.96466e-10	1.5482e-07	0	0
Myof	1.57521	2.78661	24.7524	6.51875e-07	5.93971e-05	0	0
Col11a1	1.55795	4.15849	53.2635	2.91677e-13	1.06307e-10	0	0
Cfap54	1.54978	4.06174	57.3296	3.68567e-14	1.68952e-11	0	0
Grp	1.53242	4.03546	49.8322	1.67472e-12	5.14006e-10	0	0
Rxfp1	1.50648	3.28229	15.6901	7.46142e-05	0.00343114	0	0
Slc7a3	1.47637	2.63056	20.4939	5.98226e-06	0.000391972	0	0
Plagl1	1.42272	2.71659	19.9249	8.0545e-06	0.000516152	0	0
Fam71e1	1.36465	2.90515	23.282	1.39903e-06	0.000113311	0	0
Vwc2l	1.36098	2.64428	16.1291	5.9167e-05	0.002924	0	0
Tshz3	1.34557	2.78796	17.3777	3.06395e-05	0.00165233	0	0
4933406I18Rik	1.28291	2.32136	13.5315	0.000234598	0.008393	0	0
Ucp2	1.26978	3.96119	35.1905	2.98977e-09	5.20443e-07	0	0
Hapln3	1.26498	2.43863	13.5081	0.000237533	0.00844619	0	0
Igfbp3	1.25611	4.5017	50.6746	1.09019e-12	3.43645e-10	0	0
Camkmt	1.25483	2.34433	13.7889	0.000204546	0.00740877	0	0
Cpne7	1.246	7.2504	148.962	2.9231e-34	3.40921e-31	0	0
Alad	1.23733	4.41068	47.1863	6.45492e-12	1.79247e-09	0	0
Ppp1r3g	1.23076	3.20281	21.5529	3.44201e-06	0.000240384	0	0
Piezo1	1.22816	3.20123	21.6857	3.21171e-06	0.000229804	0	0
Lyplal1	1.2236	3.2255	21.6244	3.31603e-06	0.00023489	0	0
Rbm43	1.20496	4.33438	43.2513	4.81408e-11	1.12293e-08	0	0
Fam198b	1.20387	3.35794	21.7389	3.12391e-06	0.000224902	0	0
Htr2c	1.20002	5.11064	53.8156	2.20216e-13	8.28508e-11	0	0
Tox	1.18204	2.33714	10.3636	0.00128524	0.0296826	0	0
Ccr5	1.16809	2.51814	12.5784	0.000390236	0.0123677	0	0
Ndrg1	1.16624	3.64334	24.5122	7.38403e-07	6.52424e-05	0	0
Mamdc2	1.11485	2.43612	10.9125	0.000955177	0.0241411	0	0
1700017B05Rik	1.11328	3.83159	26.6084	2.49164e-07	2.52695e-05	0	0
Adcyap1	1.10377	2.64893	12.555	0.000395146	0.0124556	0	0
Tor3a	1.09779	3.08001	16.9922	3.75341e-05	0.0019456	0	0
Baiap3	1.09251	3.0609	15.8989	6.68169e-05	0.00315784	0	0
Gm25291	1.0862	3.30852	13.5225	0.000235717	0.00840725	0	0
Pla2g3	1.06288	2.49684	9.2238	0.00238889	0.0440849	0	0
Stra6	1.06199	2.5185	10.4536	0.00122412	0.0286464	0	0
Tmem255a	1.05027	3.3243	17.3121	3.17164e-05	0.00168908	0	0
2310039H08Rik	1.04275	2.72619	12.0464	0.000518917	0.0153998	0	0
Ldb2	1.04014	3.68755	18.4225	1.76957e-05	0.00104235	0	0
Rhov	1.02456	2.60374	10.545	0.00116502	0.0276733	0	0
Rny1	1.01028	9.15982	7.34394	0.00672892	0.0868135	0	0
Cbln4	1.0088	2.91029	12.1181	0.000499355	0.0149333	0	0
Peg10	1.00271	3.17075	14.3555	0.00015134	0.00586047	0	0
Fah	1.00152	3.18166	12.5303	0.000400413	0.0125538	0	0
Adgra1	0.986899	4.92519	35.0267	3.25222e-09	5.57804e-07	0	0
Nrsn2	0.97765	3.50751	15.849	6.86039e-05	0.00320051	0	0
Csrnp1	0.972248	2.96033	11.9979	0.000532616	0.0156866	0	0
Hdhd3	0.967635	2.60261	9.79427	0.00175057	0.036136	0	0
Chil1	0.961874	2.40481	8.14881	0.00430895	0.0654378	0	0
Gpr165	0.96162	3.25195	13.9988	0.000182929	0.00677302	0	0
Ano5	0.959025	2.36681	8.20756	0.00417161	0.0642715	0	0
Lrrc51	0.954962	2.70701	10.0115	0.00155567	0.0332209	0	0
Hapln4	0.949226	3.98021	21.2209	4.09269e-06	0.000282444	0	0
Mertk	0.946531	4.6255	30.9804	2.60644e-08	3.41561e-06	0	0
Col4a6	0.939718	2.56096	9.10018	0.00255584	0.0464312	0	0
Nol12	0.939507	3.16209	13.2263	0.000276047	0.00949716	0	0
Hrh3	0.930558	3.49503	13.8889	0.000193937	0.00706839	0	0
Itpkc	0.921891	2.32907	7.24434	0.0071125	0.0891969	ts_m218	0
St3gal1	0.920797	2.90427	9.58411	0.00196268	0.0391965	0	0
Gm15564	0.91838	5.64781	7.12938	0.00758308	0.0924154	0	0
Txnip	0.899503	5.23838	32.4847	1.20136e-08	1.7736e-06	0	0
Nov	0.89936	7.1394	34.2314	4.89334e-09	7.92653e-07	0	0
Nr2f2	0.893868	3.30917	11.9195	0.000555508	0.0161166	0	0
Ntng1	0.883354	3.83425	14.5485	0.000136596	0.00545589	0	0
Vgf	0.881137	7.22205	77.2217	1.52804e-18	9.90084e-16	0	0
Crhbp	0.879716	4.14482	16.7608	4.24e-05	0.00215005	0	0
Map3k19	0.87583	2.37374	6.74389	0.00940694	0.104888	0	0
Hspg2	0.873848	4.18079	21.2621	4.0058e-06	0.000278093	0	0
Slc15a2	0.87264	4.55881	24.7222	6.62177e-07	5.9868e-05	0	0
Resp18	0.865446	3.90053	16.0152	6.28346e-05	0.00307916	0	0
Fosl2	0.862724	5.38162	18.5757	1.63285e-05	0.000981259	0	0
Cdk18	0.862572	2.94003	8.84487	0.00293913	0.0510866	0	0
Trappc2l	0.862243	5.46617	33.2705	8.01901e-09	1.24701e-06	0	0
Dnttip1	0.85955	2.81793	8.39155	0.00376969	0.0604758	0	0
Kcnj16	0.857126	3.26597	10.4911	0.00119953	0.0283201	0	0
Col6a1	0.856525	4.28691	21.1248	4.3032e-06	0.000295225	0	0
Plekha7	0.854107	4.38624	22.0876	2.60481e-06	0.000194743	0	0
Lars2	0.85131	6.94146	4.17294	0.0410745	0.247122	0	0
Dusp26	0.839266	4.74082	24.7937	6.38058e-07	5.90272e-05	0	0
Col22a1	0.837502	2.84017	7.9564	0.00479176	0.0704806	0	0
Mir3093	0.830746	2.37617	5.70318	0.0169342	0.149624	0	0
Mamld1	0.829936	3.54862	11.8314	0.0005824	0.0166515	0	0
Cbln2	0.824272	3.6777	12.3147	0.000449412	0.0138478	0	0
Ly6c1	0.821255	3.7998	14.26	0.000159216	0.00604865	0	0
Kif26a	0.817097	4.1707	15.0252	0.000106084	0.00454873	0	0
Lrp5	0.816605	3.27655	9.96756	0.00159322	0.0337237	0	0
Gm22422	0.810897	3.00671	6.8894	0.00867086	0.0999698	0	0
Mterf3	0.809372	3.71956	12.9811	0.000314648	0.0105452	0	0
Sst	0.808507	5.71697	36.6607	1.40584e-09	2.64457e-07	0	0
Tmem91	0.807601	2.54952	5.52318	0.0187662	0.159162	0	0
Car4	0.806757	3.23717	9.17589	0.00245224	0.0448538	0	0
Col6a2	0.806081	3.02126	8.5562	0.00344348	0.0572099	0	0
Plcd3	0.805129	3.52643	12.1293	0.000496344	0.0148814	0	0
Adamtsl1	0.804669	2.86006	7.70665	0.00550177	0.0765606	0	0
Mettl15	0.803604	2.55803	6.4963	0.0108099	0.114511	0	0
Fgd6	0.803463	3.44498	11.8311	0.00058251	0.0166515	0	0
Fezf2	0.803194	3.68313	12.9226	0.00032464	0.0107618	0	0
Igsf21	0.801743	4.42042	20.3011	6.61615e-06	0.00042869	0	0
Kit	0.801297	6.41378	51.5316	7.04541e-13	2.34773e-10	ts_m218	0
Zfyve19	0.799361	3.98432	15.8972	6.6877e-05	0.00315784	0	0
Mroh1	0.798608	5.77888	39.3755	3.49663e-10	7.28235e-08	0	0
Gm14636	0.79745	2.53591	6.5956	0.0102231	0.110484	0	0
Fmn1	0.79143	5.15988	24.7796	6.42755e-07	5.90272e-05	0	0
Nsdhl	0.787062	4.578	20.7558	5.21739e-06	0.000349715	0	0
Cd248	0.784867	2.38367	5.26156	0.0218015	0.17548	0	0
Rspo2	0.784099	3.07078	8.6289	0.00330871	0.0555245	0	0
mt-Nd5	0.78395	7.67789	40.2028	2.28917e-10	4.85429e-08	0	0
Gm26035	0.783931	5.18462	10.9688	0.000926607	0.023804	0	0
Atf5	0.783862	2.74528	7.12055	0.00762053	0.092678	0	0
Ifitm10	0.783477	2.9398	8.267	0.00403721	0.0634831	0	0
Cfap100	0.781288	2.80278	6.49866	0.0107956	0.114511	0	0
Slc7a11	0.780857	5.79543	26.6146	2.48357e-07	2.52695e-05	0	0
Tox3	0.778989	2.39939	5.85006	0.0155765	0.143839	0	0
Otof	0.778536	2.70165	5.7799	0.0162105	0.145995	0	0
Gm13872	0.777516	3.13706	7.41513	0.00646775	0.0847566	0	0
Scube1	0.773233	4.22759	15.4257	8.58144e-05	0.00381727	0	0
Cdkl4	0.771854	4.09721	14.7459	0.000123013	0.00512393	0	0
Scml4	0.76757	2.71453	6.55538	0.0104567	0.111785	0	0
Grik1	0.766875	3.65771	11.2623	0.000790959	0.0207302	0	0
Vwf	0.765658	5.00839	18.236	1.95155e-05	0.00112678	0	0
Pih1d1	0.763051	4.83327	22.6198	1.9744e-06	0.0001525	0	0
1700003E16Rik	0.762993	3.99771	14.3504	0.00015175	0.00586047	0	0
Pcsk5	0.762989	4.2243	10.4542	0.00122369	0.0286464	0	0
Stac2	0.752326	3.35234	9.03138	0.00265383	0.0477649	0	0
Fam198a	0.752201	2.7512	6.64359	0.00995129	0.108864	0	0
Fn1	0.750312	5.64143	33.4299	7.38785e-09	1.16438e-06	0	0
Pgam2	0.749697	2.99127	7.30533	0.00687503	0.0876451	0	0
Npy	0.747776	5.01574	24.5405	7.27648e-07	6.47829e-05	0	0
Cdh22	0.744864	3.57489	9.46378	0.00209569	0.0404618	0	0
Tle3	0.744186	5.51651	26.1021	3.23839e-07	3.20079e-05	0	0
Ppp4r1l-ps	0.742477	2.92353	7.40257	0.00651307	0.0851591	0	0
Ranbp17	0.738531	3.63198	11.4788	0.000703958	0.0193183	0	0
Pgap3	0.73508	3.04941	7.17946	0.00737427	0.0909156	0	0
Rprm	0.734843	3.38029	8.26629	0.00403879	0.0634831	0	0
Abca8a	0.734577	2.46865	5.32857	0.0209785	0.17158	0	0
Vit	0.732489	2.43651	4.86389	0.0274244	0.197595	0	0
S100a1	0.728429	5.65634	32.1727	1.41059e-08	2.03487e-06	0	0
Tns1	0.723278	4.45108	15.8877	6.72145e-05	0.00316098	0	0
Ikzf2	0.722229	2.83898	6.04374	0.0139557	0.134739	0	0
Sla	0.719975	3.57426	9.50587	0.00204816	0.0401368	0	0
Cd82	0.718556	3.12101	7.39165	0.00655272	0.0854859	0	0
Fbn2	0.717301	3.57873	9.65363	0.00188978	0.0382053	ts_m218	0
Sorbs3	0.716794	3.14442	7.56409	0.00595426	0.0804435	0	0
Etv1	0.71618	4.53805	14.6936	0.000126473	0.00520886	0	0
Vwa3a	0.714977	2.42287	4.56872	0.0325609	0.215597	0	0
Egr4	0.714403	2.88536	5.92732	0.0149079	0.140105	0	0
Blvra	0.714117	3.46151	9.25686	0.00234615	0.0435719	0	0
Fam212a	0.712565	2.84936	6.11965	0.0133687	0.131356	0	0
Leo1	0.712477	3.80276	11.9872	0.000535663	0.0157366	0	0
Helz2	0.711557	2.77369	5.74539	0.016532	0.147265	0	0
Zfp319	0.711208	3.52688	9.28925	0.00230503	0.0431518	0	0
A2m	0.707968	2.75289	5.7949	0.0160727	0.145245	0	0
Plekhb1	0.705729	5.93361	29.2259	6.44118e-08	7.66567e-06	0	0
Adora2b	0.70378	2.38313	4.03178	0.0446507	0.258487	0	0
Slc25a45	0.703644	2.45764	4.89015	0.0270104	0.195423	0	0
Entpd2	0.703054	3.05516	6.63761	0.00998477	0.108966	0	0
Amn	0.70197	3.08298	6.99622	0.00816819	0.0968639	0	0
Htr5b	0.701865	2.88474	5.75644	0.0164283	0.147048	0	0
Ighm	0.696504	3.16551	7.36564	0.00664819	0.086057	0	0
Pradc1	0.694334	2.7187	5.79658	0.0160574	0.145245	0	0
Moxd1	0.690473	3.09623	6.34867	0.0117469	0.120391	0	0
Gstcd	0.690343	2.88414	6.06672	0.0137753	0.133917	0	0
Lamp5	0.689823	2.47165	4.13107	0.0421027	0.250218	0	0
Npl	0.684508	2.62547	4.57924	0.0323615	0.21546	0	0
Dtwd1	0.683933	3.28001	7.33298	0.00677008	0.0869598	0	0
Ephb4	0.682049	3.29155	7.65625	0.00565761	0.0780884	0	0
Cntrl	0.680129	3.42358	7.95169	0.00480426	0.0704806	0	0
1700037H04Rik	0.67809	4.26538	12.5388	0.000398594	0.0125305	0	0
Slc25a42	0.674541	3.6845	9.54273	0.00200742	0.0398173	0	0
Map1s	0.672394	5.32194	21.5914	3.37354e-06	0.000237022	0	0
Abcb6	0.670011	2.94321	5.83738	0.0156892	0.144309	0	0
Met	0.669957	3.68283	9.48072	0.00207643	0.0402951	0	0
Cntfr	0.668068	3.23066	6.26612	0.0123068	0.124165	0	0
Lgals1	0.667574	3.59436	9.04566	0.00263318	0.04754	0	0
Mnt	0.66642	3.51344	8.25171	0.00407135	0.0638228	0	0
Pigyl	0.662412	3.27544	6.77534	0.00924261	0.104006	0	0
Sfxn4	0.662327	2.90147	5.64339	0.0175213	0.152603	0	0
Drc1	0.661787	3.17851	6.57372	0.0103495	0.111046	0	0
Slc9a4	0.661216	3.39736	7.59985	0.00583731	0.07937	0	0
Sugp1	0.660558	4.44165	13.1512	0.000287334	0.0097418	0	0
Mfge8	0.660152	7.26088	52.8802	3.54518e-13	1.25295e-10	0	0
Rtl1	0.659921	5.58438	23.5701	1.20445e-06	0.000101062	0	0
Dus2	0.659185	3.41481	7.25651	0.00706445	0.0886896	0	0
Tmem107	0.65819	2.75017	5.06078	0.0244732	0.185949	0	0
Gm22058	0.658136	2.52739	4.27307	0.038721	0.238391	0	0
Kcnk3	0.656628	2.4943	3.38808	0.0656692	0.317179	0	0
Zfpm1	0.654203	3.90257	9.81357	0.00173229	0.0358221	0	0
Zim1	0.651815	2.41389	4.00396	0.0453934	0.261443	0	0
Zfp385a	0.650753	2.81911	4.84107	0.0277896	0.198963	ts_m218	0
Slc6a13	0.649976	3.5182	8.04125	0.00457241	0.0679338	0	0
Trim62	0.649534	2.81482	4.71434	0.0299121	0.206263	0	0
Syt2	0.649076	4.38955	11.4368	0.000720045	0.0196212	0	0
Akr7a5	0.64903	4.59082	13.3546	0.000257793	0.00894834	0	0
Crtac1	0.645616	5.0866	18.4501	1.74413e-05	0.00103785	0	0
Nr4a2	0.64515	4.14724	10.7818	0.00102503	0.0252746	0	0
Olig2	0.644273	4.79993	15.6873	7.47243e-05	0.00343114	0	0
Tmem176b	0.643622	3.93473	9.3694	0.00220637	0.0419103	0	0
Aip	0.643435	4.19696	10.1969	0.0014068	0.0315529	0	0
Agpat4	0.641748	5.69199	22.8535	1.7483e-06	0.000137773	0	0
Intu	0.639348	3.21922	6.24789	0.0124341	0.124962	0	0
Ttc30a1	0.637688	2.39064	3.58743	0.0582182	0.298475	0	0
Gng13	0.634607	2.75135	4.78931	0.0286369	0.201567	0	0
Sstr1	0.633333	3.80466	8.21495	0.00415466	0.0641799	0	0
Scly	0.631709	3.43066	6.99694	0.00816492	0.0968639	0	0
Uba7	0.631229	2.3213	3.53408	0.0601196	0.303407	0	0
Vip	0.630915	3.66276	8.21719	0.00414954	0.0641799	0	0
Taf15	0.630288	2.74376	4.34532	0.0371108	0.233076	0	0
Stom	0.629743	3.69288	8.23572	0.00410738	0.0638725	0	0
Wwox	0.628721	3.87029	9.4727	0.00208552	0.0404043	0	0
Lhfp	0.628303	3.73024	8.59958	0.00336241	0.056183	ts_m218	0
Kansl1l	0.628034	4.54939	13.1607	0.000285883	0.0097418	0	0
Rpusd2	0.627135	2.9086	4.51837	0.0335328	0.219408	0	0
Bhlhe40	0.626592	5.15216	14.8111	0.000118836	0.00498555	0	0
Usp54	0.625343	5.22258	18.4251	1.76718e-05	0.00104235	0	0
Fzd8	0.625292	2.7448	4.3141	0.0377977	0.235614	0	0
Atp2b4	0.624364	6.51927	10.7667	0.00103343	0.0253745	0	0
Tnfaip8l1	0.623721	2.78117	4.7921	0.0285905	0.201567	0	0
Pamr1	0.620414	3.97883	9.64759	0.001896	0.0382579	0	0
Mrps27	0.618955	3.66387	7.37528	0.00661264	0.0859941	0	0
Ccdc126	0.618926	3.23791	6.22012	0.0126307	0.126448	0	0
Prrt3	0.614757	5.51766	19.8419	8.41198e-06	0.000533201	0	0
Rbm4b	0.613163	3.86858	9.27141	0.00232758	0.0433652	0	0
Tenm4	0.611228	6.92521	34.8324	3.59345e-09	6.07397e-07	0	0
Gm22973	0.609567	4.40518	10.5862	0.00113933	0.0272296	0	0
Efemp2	0.608661	3.0694	5.45274	0.0195377	0.163617	0	0
Zfp941	0.606535	3.54345	6.95793	0.00834487	0.0974891	0	0
Ankrd35	0.605713	3.01823	4.92865	0.0264149	0.193235	0	0
Foxo6	0.605086	4.29368	11.1514	0.000839678	0.021811	0	0
Notch4	0.604822	2.83269	4.1184	0.0424193	0.251262	0	0
Sorbs1	0.604731	5.78282	22.8767	1.72733e-06	0.000137047	ts_m218	0
Syde2	0.604308	2.77223	4.19871	0.0404548	0.244976	0	0
Gm22363	0.603721	2.33013	2.92359	0.0872932	0.367473	0	0
Susd5	0.603072	2.43982	3.5083	0.0610622	0.305652	0	0
Ptprf	0.602395	6.29706	27.5028	1.56864e-07	1.75914e-05	0	0
Chst8	0.601839	4.35102	9.45332	0.00210767	0.0404971	ts_m218	0
Olfml1	0.601516	3.11117	5.21526	0.0223895	0.178198	0	0
Mchr1	0.599191	3.60385	6.50847	0.0107362	0.114248	0	0
Hist1h4i	0.598909	3.09009	4.92791	0.0264263	0.193235	0	0
Zfp423	0.598195	3.12809	5.17957	0.0228539	0.179696	0	0
Tuba8	0.596768	2.50831	3.40944	0.0648245	0.315283	0	0
Arsk	0.596447	2.97643	4.69288	0.0302879	0.207549	0	0
Kcnh3	0.595588	6.26466	23.5199	1.23631e-06	0.000102263	0	0
Pde11a	0.592878	3.07926	5.27346	0.0216529	0.174856	0	0
Spon1	0.59067	6.61098	32.0903	1.47171e-08	2.09324e-06	0	0
Sardh	0.59028	4.14256	9.30344	0.00228723	0.0429565	0	0
Rnf24	0.589867	4.24618	10.5863	0.00113926	0.0272296	0	0
Hap1	0.58925	6.32997	12.3492	0.00044117	0.0136845	0	0
Slc13a4	0.588205	2.82379	4.10115	0.042854	0.252938	0	0
Gstm1	0.587825	4.49637	10.9317	0.000945323	0.0240468	0	0
Slc52a2	0.58756	3.69098	7.29813	0.00690263	0.0876965	0	0
Sapcd2	0.587355	2.98548	4.74299	0.0294179	0.204227	0	0
Nemp1	0.587064	2.61751	3.63271	0.0566544	0.29315	0	0
Prr12	0.587012	3.69157	6.86752	0.00877761	0.100662	0	0
Fzd4	0.586986	2.36518	2.87952	0.0897125	0.371562	ts_m218	0
Enho	0.584646	5.71661	20.8963	4.84834e-06	0.000328032	0	0
Elmo3	0.584579	3.18249	4.81304	0.0282452	0.200516	0	0
Col5a2	0.583809	4.75735	13.1929	0.000281007	0.00963935	0	0
Ptpru	0.58357	5.32779	16.9065	3.92665e-05	0.00202639	0	0
Smad9	0.583087	2.85909	3.80321	0.0511545	0.277629	0	0
Gpx7	0.582528	2.87153	4.76067	0.0291172	0.203228	0	0
E130317F20Rik	0.582246	2.82447	3.96739	0.0463896	0.26418	0	0
Gm24146	0.581545	3.58601	6.1704	0.0129905	0.128833	0	0
Glt8d2	0.580618	3.18293	5.03496	0.0248406	0.187159	0	0
Brinp3	0.579467	4.0559	7.29554	0.00691258	0.0877148	0	0
Dctd	0.579188	2.3586	2.84111	0.0918805	0.375079	0	0
Mrps14	0.579162	5.07896	12.2819	0.00045738	0.013928	0	0
Nlrp5-ps	0.578998	3.09627	3.70106	0.0543779	0.286427	0	0
Tmem203	0.578673	2.64063	3.3254	0.0682173	0.324081	0	0
Fam45a	0.577515	4.64596	11.7592	0.000605439	0.0171806	0	0
Pgf	0.574951	2.60338	3.31219	0.0687677	0.32537	0	0
Kirrel3	0.573975	5.17016	12.6108	0.000383521	0.012188	ts_m218	0
Cfh	0.573456	3.55574	6.70192	0.00963093	0.10647	0	0
Pms1	0.572596	3.72162	6.5322	0.0105939	0.113147	0	0
Ehd4	0.571679	2.74675	3.96399	0.0464835	0.264513	0	0
Gm15663	0.571086	2.7015	3.49319	0.0616217	0.30648	0	0
Zfp974	0.570924	2.88916	4.15993	0.041391	0.247686	0	0
P3h1	0.570536	3.21217	5.07381	0.0242899	0.18528	0	0
Rnu12	0.569949	4.42209	8.05462	0.00453878	0.0676929	0	0
Lrrc61	0.568173	2.74283	3.55442	0.059387	0.301144	0	0
Hcrtr2	0.567451	2.45958	2.90786	0.0881488	0.368563	0	0
Gm340	0.56701	3.68585	6.34361	0.0117805	0.120523	0	0
Mt3	0.566596	7.99462	24.3845	7.88995e-07	6.91884e-05	0	0
Hba-a1	0.565738	4.29701	8.87804	0.00288622	0.0504768	0	0
Col16a1	0.565714	3.91226	7.5045	0.0061545	0.0816994	0	0
Pnpla7	0.565438	4.56453	11.2832	0.000782137	0.0206382	0	0
Wbp11	0.565086	5.33278	9.57267	0.00197495	0.0393123	0	0
Lonrf3	0.564268	3.11202	4.75856	0.0291529	0.203309	0	0
Mcm9	0.562526	2.79904	3.5631	0.0590773	0.30011	0	0
Lama1	0.562494	3.74357	6.36867	0.0116153	0.119672	0	0
Stxbp2	0.560793	3.45201	5.53114	0.0186809	0.158801	0	0
AW551984	0.560673	3.61678	6.41115	0.0113406	0.118199	0	0
mt-Nd2	0.560029	8.03932	37.5624	8.85337e-10	1.69274e-07	0	0
Mkl1	0.559961	5.32541	11.3354	0.000760438	0.0202027	0	0
Gm25117	0.559352	5.00037	12.2953	0.000454103	0.0139009	0	0
Grik3	0.559314	4.90568	12.8027	0.000346123	0.0113394	ts_m218	0
Gjb1	0.558725	2.34659	2.66778	0.102399	0.395981	0	0
Tm2d1	0.55739	3.88162	7.38589	0.00657375	0.0856644	0	0
Ccnf	0.556619	2.6892	3.47109	0.0624502	0.308495	0	0
Rftn2	0.555595	4.16268	8.19725	0.0041954	0.0643828	ts_m218	0
mt-Rnr1	0.554163	14.6458	31.8008	1.70826e-08	2.40041e-06	0	0
Thbs1	0.554158	2.84444	3.52235	0.0605465	0.304508	0	0
Npr3	0.552527	3.73331	5.97418	0.0145168	0.137987	0	0
Mpg	0.552015	3.24853	4.68527	0.0304222	0.208044	0	0
Gaa	0.55197	7.40615	32.7527	1.04658e-08	1.58523e-06	0	0
Car2	0.551951	6.39623	9.98674	0.00157671	0.0334821	ts_m218	0
Fcgr3	0.551853	3.25214	4.57965	0.0323538	0.21546	0	0
Grm8	0.550954	2.99021	3.79904	0.051282	0.278067	0	0
Rreb1	0.550694	3.79898	6.77837	0.00922691	0.104006	0	0
Rwdd3	0.550451	3.44504	5.23152	0.0221811	0.176957	0	0
Cpne2	0.550027	4.88476	12.3211	0.000447878	0.0138478	0	0
Gm25541	0.549011	3.27253	3.86872	0.049194	0.272436	0	0
Vstm4	0.548659	2.44262	2.81357	0.0934702	0.378917	0	0
Kcnc4	0.548027	4.57359	9.22458	0.00238788	0.0440849	0	0
Akain1	0.547931	2.35698	2.71519	0.099397	0.389932	0	0
Ubiad1	0.547171	3.48766	5.45235	0.019542	0.163617	0	0
Tac1	0.547112	3.0591	4.24604	0.039342	0.240864	ts_m218	0
Gm22486	0.547012	5.03085	3.7882	0.051615	0.279085	0	0
n-R5-8s1	0.54649	3.05684	2.09798	0.147494	0.475416	0	0
Tpd52l1	0.546434	3.60479	6.13099	0.0132832	0.130736	0	0
Mpeg1	0.54557	3.19528	4.97058	0.025782	0.190798	0	0
Nsun4	0.545313	3.23898	4.92096	0.0265327	0.19377	0	0
Gm24119	0.545196	7.3725	15.9312	6.56855e-05	0.00315263	0	0
Arhgef15	0.543855	2.89123	3.53793	0.0599804	0.303099	0	0
Dennd3	0.54213	2.64449	3.24225	0.071762	0.332391	0	0
Entpd3	0.541886	2.35404	2.21975	0.136255	0.456991	0	0
Tmem104	0.541393	3.26735	4.76465	0.02905	0.203002	0	0
Radil	0.540882	2.73912	3.01203	0.0826489	0.357777	0	0
2610524H06Rik	0.540583	3.92549	7.27826	0.0069794	0.0880705	0	0
Rps16	0.539346	3.87154	5.68976	0.0170642	0.150431	0	0
Cox18	0.539326	3.81784	5.76841	0.0163168	0.146724	0	0
Klhl40	0.539012	2.63107	3.1252	0.0770906	0.344354	0	0
Gstz1	0.538242	4.24464	8.71641	0.00315358	0.0536191	0	0
Gm23442	0.538144	3.94383	4.86168	0.0274596	0.197692	0	0
Plcl2	0.536742	7.11688	29.9321	4.47444e-08	5.55164e-06	ts_m218	0
Srrm4	0.536612	3.88831	4.90573	0.0267677	0.194876	0	0
Vstm2l	0.536417	4.93808	10.4408	0.00123265	0.0286464	0	0
Megf11	0.535844	4.63517	9.06464	0.00260599	0.0471952	0	0
Pvalb	0.535341	4.6227	6.89951	0.00862194	0.0996608	0	0
Chsy3	0.535152	3.0119	3.43133	0.0639706	0.312943	0	0
Rpp30	0.535131	2.98726	4.00592	0.0453408	0.26127	0	0
Mypop	0.535111	2.79738	3.46313	0.0627516	0.309439	0	0
Polr2l	0.533862	3.20245	4.21347	0.0401041	0.244248	0	0
Trpc6	0.533311	4.75395	9.63386	0.00191023	0.0384784	0	0
Adra1d	0.533098	5.00656	9.70279	0.00183988	0.0375806	0	0
Sema4g	0.532805	3.83149	6.17309	0.0129708	0.128833	0	0
Cdk5rap1	0.532782	3.66322	5.91794	0.0149874	0.140344	0	0
Stard8	0.532588	3.68769	5.93635	0.0148317	0.139725	0	0
Tspan9	0.531504	6.16143	18.6288	1.58801e-05	0.000959633	ts_m218	0
Acvrl1	0.530944	3.47541	5.25844	0.0218406	0.175673	0	0
Alpk1	0.530492	2.84959	3.32902	0.0680674	0.323632	0	0
Pcsk1n	0.530325	5.97607	13.3817	0.000254092	0.00889933	0	0
Nedd9	0.529105	4.65367	8.72539	0.00313809	0.0536191	0	0
Pcdhb4	0.52887	2.60414	2.96261	0.0852103	0.362307	0	0
Ank1	0.528285	4.68094	9.44581	0.00211632	0.0405964	0	0
Zfp36l1	0.528049	2.36653	2.49253	0.114388	0.418316	0	0
Tpbg	0.527425	3.08359	4.06822	0.0436972	0.255403	0	0
Pitpnm3	0.52711	4.72136	10.0365	0.00153465	0.0331531	0	0
Arid5b	0.526933	3.75163	5.64753	0.01748	0.152368	0	0
Dnmbp	0.526622	3.42988	5.27579	0.021624	0.174856	0	0
Rps26	0.526476	5.38407	13.9401	0.000188724	0.00694349	0	0
Vwa5b2	0.525675	3.92944	6.6897	0.00969716	0.106999	0	0
Msantd1	0.524448	2.31615	2.21167	0.13697	0.457994	0	0
Cc2d1a	0.523927	5.56316	14.6236	0.000131257	0.00532706	0	0
Cthrc1	0.522209	2.4948	2.72915	0.0985314	0.387972	0	0
Nemp2	0.521836	2.67398	2.74158	0.097768	0.386747	0	0
Slc2a1	0.521706	6.27677	17.9996	2.20951e-05	0.0012449	0	0
Npas3	0.521264	4.07013	7.29385	0.00691911	0.0877148	0	0
Phldb2	0.521014	2.80855	3.30916	0.0688946	0.325657	0	0
Grin3a	0.517734	6.10923	20.8894	4.86577e-06	0.000328032	0	0
Bloc1s6	0.517218	4.6835	10.3217	0.00131479	0.0300674	0	0
Crb2	0.517017	3.49539	5.03029	0.0249078	0.187159	0	0
Hint2	0.515718	4.1648	6.73426	0.00945782	0.105292	0	0
Lrtm2	0.515199	4.64817	9.50789	0.0020459	0.0401368	0	0
Rhobtb1	0.514673	2.39298	2.43075	0.118976	0.426356	ts_m218	0
Angel1	0.514611	2.47112	2.46843	0.116154	0.421631	0	0
Cdh18	0.514312	3.30789	4.27251	0.0387338	0.238391	0	0
Tmem42	0.514096	3.09357	3.7503	0.0527982	0.282341	0	0
Ttc23	0.513918	2.67336	3.04921	0.0807766	0.35346	0	0
Pelp1	0.513185	4.38493	7.9895	0.00470494	0.0695485	0	0
Tmem176a	0.512948	3.04441	3.47523	0.0622942	0.307985	0	0
Pigu	0.512135	3.82752	6.46351	0.0110112	0.115906	0	0
Tomm5	0.512068	4.14137	7.19397	0.00731491	0.0906629	0	0
Nfatc2	0.510965	2.80696	3.27434	0.0703712	0.329673	0	0
Col12a1	0.510714	3.64698	5.00026	0.0253435	0.188628	0	0
Fuom	0.510542	4.28201	7.75574	0.00535421	0.0752363	0	0
Vstm2b	0.509514	4.52292	8.58444	0.00339048	0.0565711	0	0
Kank2	0.50914	3.22438	3.68891	0.0547755	0.28738	0	0
Rims2	0.508877	5.893	11.6339	0.0006476	0.0181561	0	0
Setd1a	0.508231	3.09464	3.67798	0.0551355	0.28862	0	0
Bcl2	0.50794	3.37505	4.67018	0.0306906	0.209105	0	0
Bbs9	0.507078	4.66762	9.49648	0.00205867	0.0401509	0	0
Htr2a	0.505496	2.39205	2.39175	0.121977	0.432538	0	0
Map1a	0.505135	9.70503	28.5119	9.31253e-08	1.08612e-05	0	0
Celsr1	0.504691	3.77754	4.85523	0.0275625	0.198188	0	0
Syt10	0.50459	2.55304	2.35354	0.124999	0.437665	0	0
Hmgcs2	0.501995	4.437	8.06485	0.00451323	0.0673979	0	0
Angpt2	0.501418	2.68072	2.60789	0.106333	0.404347	0	0
Bgn	0.501169	3.09378	3.74919	0.0528331	0.282398	0	0
Sh3yl1	0.499113	2.67131	2.40421	0.121009	0.431073	0	0
Cers5	0.498958	5.52224	10.6846	0.00108034	0.0260711	0	0
Pdss1	0.498608	2.98366	3.18759	0.0741992	0.338305	0	0
Acot11	0.498223	5.01487	10.8297	0.000998858	0.0249458	0	0
Entpd6	0.497583	6.50194	15.6008	7.82212e-05	0.00356365	0	0
Zfp438	0.49635	2.42437	2.03789	0.153422	0.482438	0	0
Creg1	0.495892	4.19249	6.75373	0.0093552	0.104611	0	0
Zfp618	0.495257	2.92211	2.98599	0.0839881	0.360109	0	0
Cux2	0.493707	4.48279	8.07009	0.00450018	0.0673979	0	0
Tmem134	0.493092	4.72269	8.99575	0.00270608	0.0484808	0	0
Hist2h2ac	0.492837	3.01275	3.3008	0.0692461	0.326531	0	0
Zfp574	0.492657	4.35148	7.16361	0.00743974	0.0913365	0	0
Lfng	0.492339	4.30825	6.99015	0.00819594	0.0969466	0	0
Smim17	0.491214	4.43541	7.50529	0.00615181	0.0816994	0	0
Pglyrp1	0.490979	2.47157	2.32618	0.127213	0.441181	0	0
Prdm16	0.490587	3.39772	4.12298	0.0423045	0.25071	0	0
Gng3	0.49044	5.40494	13.0857	0.000297559	0.0100592	ts_m218	0
Dusp1	0.490306	3.79707	5.63601	0.0175952	0.152689	0	0
Sox9	0.489479	3.61629	4.94499	0.0261664	0.192299	0	0
Fam43b	0.489327	2.80876	2.88844	0.0892174	0.370393	0	0
Ssbp1	0.489055	3.3671	3.92987	0.0474357	0.267267	0	0
Agbl4	0.488989	2.96211	2.80115	0.0941967	0.380275	0	0
Yipf2	0.488796	3.87023	5.81542	0.0158863	0.144553	0	0
Mgst3	0.488648	6.56243	16.9984	3.74104e-05	0.0019456	0	0
Poli	0.488408	2.89703	2.98984	0.0837885	0.359936	0	0
Sik1	0.487949	3.79745	5.21335	0.0224142	0.178198	0	0
Trmt112	0.487607	2.47945	2.3247	0.127335	0.441315	0	0
Bbs5	0.486295	3.84197	5.44124	0.0196667	0.164307	0	0
Osmr	0.486278	2.36956	2.10126	0.147177	0.474835	0	0
Fam50a	0.486109	2.8145	2.86589	0.0904759	0.37294	0	0
Insm1	0.485712	2.4586	2.17917	0.13989	0.464147	0	0
Plce1	0.485337	4.35157	4.008	0.0452849	0.261206	0	0
Lin9	0.485247	2.40272	2.14048	0.143457	0.469321	0	0
Zfp94	0.484178	3.41635	3.85892	0.0494823	0.272506	0	0
Spag5	0.483922	2.42684	2.1274	0.144686	0.471532	0	0
Slc38a7	0.483887	5.15648	10.5682	0.00115052	0.0274407	0	0
Rnf208	0.482756	3.72677	4.85165	0.0276196	0.198239	0	0
Gimap6	0.482482	2.60259	2.37174	0.123549	0.4357	0	0
Cib2	0.482377	3.84285	5.6101	0.0178573	0.154049	0	0
Scube3	0.482093	3.8332	5.02626	0.0249657	0.187159	0	0
Myo19	0.481653	2.49609	2.08394	0.148855	0.476763	0	0
Fras1	0.481507	5.44674	12.0859	0.000508051	0.0151545	0	0
Zmiz2	0.481305	6.1512	13.9323	0.000189512	0.00695055	ts_m218	0
Pxmp4	0.481283	4.1772	6.4256	0.0112487	0.117383	0	0
Fam196a	0.481053	3.37709	3.65469	0.0559116	0.290855	ts_m218	0
Uaca	0.480031	2.70574	2.57813	0.108349	0.407983	0	0
2610001J05Rik	0.479132	3.09295	3.31801	0.0685246	0.324747	0	0
Lyn	0.478687	3.20962	3.25219	0.0713281	0.331578	0	0
Cxxc4	0.478484	3.95295	4.84863	0.0276681	0.198336	0	0
Gkap1	0.477784	2.74933	2.62001	0.105524	0.403466	0	0
Pld1	0.477397	3.29278	3.47773	0.0622001	0.30772	0	0
Prkab1	0.477213	3.18874	3.57483	0.0586613	0.299351	0	0
Gm25835	0.476067	6.65479	2.99255	0.0836483	0.359466	0	0
Mavs	0.475734	3.04952	3.20542	0.0733948	0.336933	0	0
Cyb561	0.47454	5.05585	8.97052	0.00274371	0.0489295	0	0
Itga3	0.474481	3.79556	4.76564	0.0290333	0.203002	0	0
Gjb6	0.474471	5.13343	8.92377	0.00281482	0.0498168	0	0
Bcl9l	0.474465	3.82806	4.85415	0.0275796	0.198189	0	0
Gm9987	0.474212	2.34481	2.03813	0.153398	0.482438	0	0
Wdr3	0.474068	4.69597	8.7149	0.0031562	0.0536191	0	0
Amz1	0.473807	3.8656	4.97053	0.0257828	0.190798	0	0
Lama5	0.473754	3.52062	4.43368	0.0352365	0.226926	0	0
Efnb1	0.473448	3.2731	3.45638	0.0630083	0.31007	0	0
Gstm6	0.472948	2.88704	2.91831	0.0875795	0.367821	0	0
Tmem120b	0.472342	3.32337	3.49322	0.0616206	0.30648	0	0
Rnft1	0.470989	3.77752	5.20237	0.0225561	0.178596	0	0
Smn1	0.470935	3.37047	4.07733	0.0434622	0.254763	0	0
Gpt	0.470467	3.21608	3.43071	0.0639946	0.312943	0	0
Relb	0.470123	3.07751	3.37397	0.0662339	0.318169	0	0
Plcb3	0.469857	3.68772	4.74934	0.0293095	0.203595	0	0
Pak4	0.469853	5.42092	11.4405	0.000718605	0.0196212	0	0
Galnt9	0.469526	5.98563	11.1207	0.0008537	0.022126	0	0
Eml3	0.469263	3.073	2.89019	0.0891206	0.370393	0	0
Mettl25	0.468634	2.3267	1.92159	0.165682	0.499263	0	0
Snx33	0.468267	3.73742	4.55762	0.0327726	0.216436	0	0
Nudt14	0.467736	2.33418	1.72718	0.188771	0.529367	0	0
Sox5	0.46756	4.31629	6.37126	0.0115983	0.119603	ts_m218	0
Wiz	0.467107	4.01085	5.34633	0.0207659	0.17062	0	0
Zfp526	0.466986	3.44109	3.80778	0.051015	0.277294	0	0
Fgd5	0.466781	2.87465	2.57451	0.108597	0.408572	0	0
Ckmt1	0.466669	7.91612	31.6847	1.81349e-08	2.48832e-06	0	0
Usp36	0.465961	4.77813	8.08694	0.00445853	0.0669238	0	0
Zrsr1	0.465077	3.787	4.75251	0.0292556	0.203587	0	0
Ptch1	0.464891	4.82404	7.44989	0.00634402	0.083557	0	0
Fzd2	0.464362	3.09948	2.99807	0.0833639	0.358905	0	0
Gpr153	0.464317	4.03639	5.64931	0.0174623	0.152328	ts_m218	0
Pcp4l1	0.464194	3.85715	5.17068	0.0229712	0.179919	0	0
Sntb1	0.463643	2.38544	1.73999	0.18714	0.52732	0	0
Tecr	0.462952	7.81778	23.4918	1.25446e-06	0.000103034	0	0
Sntg2	0.462925	2.38889	1.95612	0.161929	0.494054	0	0
Cnnm3	0.46141	4.12664	5.63341	0.0176213	0.152689	0	0
Ctps2	0.461337	4.5497	6.78118	0.00921241	0.104006	0	0
Nr2c1	0.46125	2.99434	2.80053	0.094233	0.38029	0	0
Mrps6	0.461238	3.22429	3.28471	0.069928	0.32841	0	0
Iqgap1	0.460319	5.16142	8.09509	0.00443853	0.0668121	0	0
Cadm1	0.459663	7.24181	15.963	6.45934e-05	0.00314003	0	0
Xrcc5	0.459513	3.74192	4.83541	0.0278811	0.199221	0	0
Fbxw9	0.459448	4.85716	8.19831	0.00419294	0.0643828	0	0
Plekhg5	0.459037	6.66279	15.2489	9.42338e-05	0.00413176	0	0
Cwf19l1	0.458705	3.55417	4.02111	0.044934	0.259567	0	0
Top3a	0.458554	2.95569	2.6894	0.101018	0.393774	0	0
Junb	0.458413	5.56826	10.3064	0.00132567	0.030257	0	0
Txn2	0.458121	3.93388	4.30168	0.0380746	0.236456	0	0
Pde1c	0.457903	2.80315	2.6232	0.105312	0.403233	0	0
Tap1	0.457823	2.46402	1.96067	0.161442	0.493245	0	0
Tmem130	0.457647	6.57622	19.6896	9.10977e-06	0.000571222	0	0
Abca9	0.457572	4.0801	5.36027	0.0206005	0.170091	0	0
Svil	0.457458	3.88872	4.29471	0.0382311	0.236923	0	0
Pitpnm1	0.457209	7.34405	27.1841	1.84976e-07	1.94358e-05	0	0
Osgepl1	0.456874	2.93784	2.94273	0.0862648	0.364531	0	0
Gramd2	0.456735	2.40091	1.67271	0.195896	0.537658	0	0
Fmnl3	0.456666	3.86623	5.32656	0.0210028	0.171626	0	0
Rny3	0.456418	6.24988	13.3665	0.000256156	0.00891845	0	0
Fibcd1	0.456389	7.43807	23.37	1.33644e-06	0.000108999	0	0
Arhgap15	0.456141	3.75048	4.73169	0.0296117	0.205283	ts_m218	0
Dffb	0.456102	2.61981	2.41381	0.12027	0.429355	0	0
Rab3b	0.455715	4.71916	7.84384	0.00509941	0.0729747	0	0
Rftn1	0.455666	4.0182	5.1295	0.0235225	0.182108	0	0
Slc6a11	0.455638	6.71446	14.1973	0.000164603	0.00621284	0	0
Arx	0.455638	2.97742	2.66361	0.102668	0.396574	0	0
Stk10	0.455442	3.13961	2.88924	0.0891728	0.370393	0	0
Slc19a1	0.455022	3.864	4.55066	0.032906	0.216949	0	0
Pdlim4	0.454852	3.35562	3.75607	0.052616	0.281763	0	0
Zfp446	0.454384	2.94269	2.80746	0.0938269	0.379703	0	0
P4ha2	0.453723	3.39207	3.58735	0.0582209	0.298475	0	0
Cbr1	0.453082	4.61341	4.64459	0.0311516	0.210743	0	0
Prr5l	0.452929	2.70693	2.12724	0.144701	0.471532	0	0
Slc20a2	0.452666	5.45249	11.4873	0.00070073	0.019275	0	0
Ahdc1	0.451511	5.06075	6.21349	0.012678	0.126596	0	0
Tmem129	0.45132	4.59345	7.1538	0.00748053	0.0916444	0	0
Aldh1l1	0.450998	6.38408	17.3626	3.08847e-05	0.00165233	0	0
Il4ra	0.450409	2.8936	2.57782	0.108371	0.407983	0	0
Shroom1	0.449938	3.22483	3.14951	0.07595	0.341746	0	0
Gm25107	0.44952	4.63322	2.28151	0.130924	0.448318	0	0
Kcnj10	0.44916	5.31822	10.1667	0.00142998	0.0318279	0	0
Noc4l	0.448544	3.75474	4.17552	0.041012	0.24694	0	0
Gm25395	0.448541	8.29428	10.9554	0.000933316	0.0238712	0	0
Adal	0.448444	3.89126	4.86867	0.0273486	0.197259	0	0
Fbn1	0.448034	4.38518	5.50099	0.0190057	0.160393	0	0
Fam222b	0.447703	3.93357	4.72511	0.0297252	0.205382	0	0
Slc26a11	0.447582	2.36687	1.84519	0.174344	0.51128	0	0
Chst12	0.447288	2.49401	1.87376	0.171045	0.506576	0	0
Stambp	0.446859	2.78339	2.3491	0.125355	0.438124	0	0
Grem2	0.44648	3.57147	3.47404	0.0623388	0.308075	0	0
Mtrr	0.446439	4.12734	4.72302	0.0297614	0.20551	0	0
Agt	0.445662	4.87123	7.36789	0.00663988	0.0860454	0	0
Orai1	0.44522	2.70561	2.11041	0.146301	0.47371	0	0
Tctn2	0.445088	3.44809	3.69805	0.0544762	0.286427	0	0
Nkd1	0.444601	3.33208	3.34166	0.0675466	0.322319	0	0
6430573F11Rik	0.443816	3.18139	3.00163	0.0831809	0.358578	0	0
Dhrs13	0.443278	3.19093	3.16485	0.0752394	0.340255	0	0
Atp5s	0.442125	3.00495	2.72394	0.098854	0.388717	0	0
Jak3	0.441364	2.87099	2.37283	0.123463	0.435672	0	0
Panx2	0.441353	4.17843	4.98556	0.0255597	0.189875	0	0
Senp1	0.440686	3.70175	4.27771	0.0386154	0.23804	ts_m218	0
Gab2	0.440536	4.03371	5.05139	0.0246062	0.186604	0	0
Pygm	0.440368	4.80377	7.2869	0.00694593	0.0879591	0	0
Cmbl	0.440341	3.00456	2.59899	0.106932	0.404787	0	0
BC005561	0.440141	3.35142	3.20612	0.0733635	0.336933	0	0
Sarnp	0.440095	2.66728	2.21793	0.136416	0.45732	0	0
Spats2l	0.440072	3.64846	4.10681	0.0427108	0.252348	0	0
Tubgcp5	0.43958	4.63855	6.70217	0.00962959	0.10647	0	0
Dlgap3	0.438738	7.46519	16.8379	4.07129e-05	0.00209178	0	0
Adamts16	0.438428	2.58831	1.96287	0.161207	0.492794	0	0
Rin1	0.438292	5.898	10.4402	0.001233	0.0286464	0	0
Slc25a40	0.438268	2.96684	2.60732	0.106371	0.404347	0	0
Ebf4	0.438026	2.39529	1.72067	0.189607	0.530437	0	0
Gli3	0.437174	3.10352	2.74922	0.0973017	0.385472	0	0
Ryr1	0.437139	4.18386	5.4259	0.0198402	0.165187	0	0
4833422C13Rik	0.437054	2.59937	1.86491	0.172059	0.507303	0	0
Pacrg	0.436757	2.58954	1.91	0.166964	0.501106	0	0
Mrps24	0.436352	4.90439	7.68492	0.00556843	0.077223	0	0
Fa2h	0.436047	3.89631	3.87822	0.0489165	0.271707	0	0
Tada3	0.435393	4.14488	5.19428	0.0226613	0.178987	0	0
Pla2g6	0.434652	4.27996	5.12946	0.023523	0.182108	0	0
Cdyl2	0.434347	4.31951	5.75758	0.0164177	0.147048	0	0
Jund	0.43434	5.79448	12.1833	0.000482181	0.0145691	0	0
Triobp	0.434117	3.37235	3.51887	0.0606738	0.304754	0	0
Mocs3	0.433978	3.72133	4.16446	0.0412806	0.247549	0	0
Slc6a17	0.433823	8.39195	31.0381	2.53013e-08	3.36347e-06	ts_m218	0
Tyw3	0.433821	2.9084	2.52675	0.11193	0.413246	0	0
Slit3	0.433141	6.08088	10.3499	0.00129479	0.0298442	0	0
Rttn	0.432373	2.94643	2.28264	0.130829	0.448318	0	0
Relt	0.431441	3.30486	3.17132	0.0749419	0.339729	0	0
Myo16	0.430911	6.15219	10.0277	0.00154206	0.0331828	ts_m218	0
Mettl8	0.430243	3.35943	3.04394	0.0810391	0.353699	0	0
Amdhd2	0.430223	4.1651	4.8516	0.0276206	0.198239	0	0
1500009L16Rik	0.430041	3.41386	3.00926	0.0827903	0.357777	0	0
Tifa	0.429124	2.58926	1.98761	0.158591	0.489119	0	0
Efhd2	0.428713	5.2434	8.39791	0.00375653	0.0603477	0	0
Idnk	0.428662	4.17292	5.11033	0.0237838	0.183096	0	0
Rnf123	0.428255	5.19867	8.82938	0.00296419	0.051369	0	0
Zbtb7b	0.42819	3.21596	2.66328	0.102689	0.396574	0	0
Kif21b	0.427869	7.15822	21.6204	3.32306e-06	0.00023489	ts_m218	bc5_chi_m218
Slc1a6	0.427836	3.3203	3.30928	0.0688898	0.325657	0	0
Crym	0.427692	8.50831	18.2715	1.9155e-05	0.00111374	0	0
Xrcc3	0.427543	2.55815	1.8029	0.179363	0.517229	0	0
Gpr34	0.427478	3.44751	2.80478	0.0939838	0.37981	0	0
Foxj1	0.42706	3.34487	3.12594	0.0770553	0.344328	0	0
Adrb1	0.427038	2.88616	2.13897	0.143599	0.469392	0	0
Msrb3	0.426963	2.43088	1.74493	0.186515	0.526707	0	0
Ssbp2	0.42659	5.19246	8.04691	0.00455814	0.0678081	0	0
Ccdc190	0.426111	2.45792	1.79647	0.180139	0.518044	0	0
Etv5	0.426076	5.66303	10.7668	0.00103339	0.0253745	0	0
Srebf1	0.425969	5.37339	6.77266	0.00925647	0.104006	0	0
Amotl2	0.425526	4.77074	6.48171	0.010899	0.11514	0	0
Etv4	0.425452	3.59015	3.58744	0.058218	0.298475	0	0
Per1	0.425175	5.32142	9.09097	0.00256874	0.0465929	0	0
Kxd1	0.424914	4.36275	5.55727	0.0184041	0.157059	0	0
Nphp3	0.424906	3.10545	2.53427	0.111399	0.412196	0	0
Sh3bgrl2	0.423941	4.71841	5.72662	0.0167096	0.148388	0	0
Acd	0.423133	3.85106	4.05014	0.0441678	0.257307	0	0
Haus7	0.422996	2.67319	2.05057	0.15215	0.48116	0	0
Tm2d3	0.42297	4.60156	6.31575	0.011967	0.121897	0	0
Psmg1	0.422695	3.45951	3.50855	0.061053	0.305652	0	0
Snrpa	0.422388	4.40922	5.53748	0.0186133	0.158458	0	0
Sulf1	0.422302	2.72875	1.51756	0.21799	0.562473	0	0
Cit	0.422193	5.12419	6.0576	0.0138465	0.134241	0	0
Fam151b	0.421784	2.99962	2.49581	0.11415	0.417736	0	0
Snora21	0.421616	3.7964	1.73987	0.187155	0.52732	0	0
Sap130	0.421538	4.02348	4.58125	0.0323237	0.21546	0	0
Gm16432	0.421486	2.89397	2.33381	0.126592	0.43994	0	0
Ccdc39	0.421474	3.69805	3.57117	0.058791	0.299554	0	0
Scrt1	0.421048	4.0228	4.43763	0.0351551	0.226798	ts_m218	0
Ptgds	0.420983	6.02867	1.80708	0.178858	0.516087	0	0
Tipin	0.420626	3.36841	3.2453	0.0716284	0.332276	0	0
Wdr46	0.420391	3.02551	2.34295	0.125851	0.438691	0	0
Dimt1	0.420262	3.21218	2.75575	0.0969054	0.384747	0	0
Calb2	0.420262	5.99109	5.16728	0.0230162	0.179919	0	0
Med26	0.420189	2.95347	2.40545	0.120913	0.430862	0	0
Sez6l2	0.419532	7.27745	21.866	2.9237e-06	0.000213119	0	0
Uckl1os	0.419231	2.32594	1.41644	0.23399	0.579535	0	0
Rgma	0.419109	3.63871	3.17015	0.0749957	0.339729	0	0
Dpy30	0.418811	3.52638	3.38093	0.0659548	0.317602	0	0
Zfp28	0.418277	2.60796	1.94455	0.163175	0.495665	0	0
Klhdc7a	0.418125	3.4269	3.13401	0.0766749	0.343154	0	0
Dolpp1	0.4178	4.47025	5.94622	0.0147489	0.139281	ts_m218	0
Irf1	0.417434	2.61183	1.73356	0.187957	0.528101	0	0
Rps27	0.417188	6.72685	11.3023	0.000774115	0.0205193	0	0
Pcyox1l	0.416966	4.12785	4.58671	0.0322207	0.21546	0	0
Bend5	0.416502	2.67347	1.90571	0.167441	0.501941	0	0
Arhgap33	0.416086	5.03335	6.82899	0.00896901	0.102454	0	0
Sspn	0.415812	3.05228	2.43545	0.11862	0.426207	ts_m218	0
Phf21b	0.415344	2.63594	1.78666	0.181333	0.519629	ts_m218	0
Gltscr2	0.415178	5.93084	10.8635	0.000980765	0.0245465	0	0
Pex12	0.414745	2.75551	1.8296	0.176175	0.51317	0	0
Cdh4	0.413496	3.87212	3.69781	0.054484	0.286427	ts_m218	0
Tsc22d3	0.413456	6.39092	14.0316	0.000179767	0.00671996	0	0
Nfkbil1	0.41339	2.53573	1.68118	0.194767	0.536251	0	0
Pgam5	0.412565	4.98416	7.3709	0.00662879	0.0860454	0	0
Arhgap10	0.411901	3.48358	3.15246	0.0758124	0.341522	0	0
Cacng4	0.411706	3.94457	4.17552	0.0410119	0.24694	0	0
Frzb	0.411486	4.45683	4.57781	0.0323886	0.21546	0	0
Tyw1	0.411373	4.49778	5.82726	0.0157797	0.144553	0	0
Slc35f6	0.411188	5.32279	7.22201	0.00720152	0.0898541	0	0
Rad9b	0.410746	2.37223	1.46393	0.226305	0.571699	0	0
Med27	0.410374	4.43448	5.33561	0.0208941	0.171471	0	0
Atp2a3	0.409956	2.41027	1.45003	0.228523	0.574985	0	0
Itm2c	0.409685	9.5122	31.0322	2.53782e-08	3.36347e-06	ts_m218	0
Wipf2	0.409369	4.93242	7.23251	0.0071595	0.0896898	ts_m218	0
Litaf	0.40931	3.36861	2.95019	0.0858673	0.363491	0	0
Mdk	0.409082	3.81645	3.84059	0.0500258	0.2744	0	0
Tyro3	0.408618	6.73557	10.0939	0.00148764	0.0326748	0	0
Nynrin	0.408438	2.97267	1.96961	0.16049	0.4918	0	0
Rft1	0.408266	3.73337	3.20263	0.0735198	0.336933	0	0
Pdk2	0.408117	4.1353	4.16578	0.0412484	0.247549	0	0
Asphd1	0.408084	3.5306	3.13681	0.0765434	0.343018	0	0
Rfc5	0.407974	3.99187	4.12557	0.0422398	0.250654	0	0
Slc29a4	0.407866	4.94941	7.11239	0.00765529	0.0930038	0	0
Col8a2	0.407685	2.78581	1.48355	0.223221	0.569137	0	0
Yif1a	0.407579	4.20516	4.60623	0.031856	0.214019	0	0
Wdr6	0.407401	7.75039	9.21402	0.00240168	0.0441811	0	0
Magt1	0.406941	3.98544	4.01577	0.0450767	0.260133	0	0
Gjd2	0.406732	3.84715	3.03891	0.0812906	0.354162	0	0
Pcnx2	0.406421	6.5016	11.7399	0.000611745	0.0173174	0	0
Pard6a	0.406309	4.86801	6.6801	0.00974953	0.107475	0	0
Uckl1	0.406194	4.25593	4.9066	0.0267542	0.194876	0	0
Timp4	0.4059	5.96615	10.9938	0.000914181	0.0235366	0	0
Timp2	0.405664	7.31924	15.5507	8.03213e-05	0.00364509	0	0
Nod1	0.405626	2.7107	1.75718	0.184977	0.524529	0	0
Maged1	0.40555	9.37988	41.5971	1.12159e-10	2.46813e-08	0	0
Ptcd1	0.405393	4.29104	4.56816	0.0325715	0.215597	0	0
Slc26a1	0.405098	2.59117	1.82379	0.176863	0.514147	0	0
Ermard	0.404943	2.58448	1.69315	0.193186	0.534171	0	0
Wnt4	0.404706	2.83267	2.04305	0.152903	0.481976	0	0
Azin2	0.40398	4.89886	6.97351	0.00827252	0.0974891	0	0
Gdap1l1	0.403674	5.44839	8.03608	0.00458547	0.0680411	0	0
Skap2	0.402641	3.41261	2.79478	0.0945717	0.380735	ts_m218	0
Ap1s1	0.402362	6.03504	11.4171	0.000727716	0.0196564	0	0
Vwc2	0.401726	2.87255	1.91765	0.166116	0.499666	0	0
Chrm4	0.401655	3.4105	2.80987	0.0936859	0.379395	0	0
Ndufs6	0.401387	4.46716	5.43565	0.0197297	0.164598	0	0
Slc12a4	0.400977	4.64628	6.07381	0.0137201	0.133682	0	0
Sema4a	0.400924	4.27196	4.87405	0.0272634	0.196887	0	0
Alkbh4	0.400875	3.05523	2.31118	0.128446	0.443664	0	0
Gm13375	0.400799	2.43878	1.44576	0.22921	0.575147	0	0
1700001L19Rik	0.400725	2.71462	1.76426	0.184094	0.522915	0	0
Snrpa1	0.400595	3.8763	3.5388	0.0599488	0.303099	0	0
Atp10a	0.400481	2.93297	1.8504	0.173737	0.510529	0	0
Pcdhga9	0.399883	2.61331	1.55234	0.21279	0.556762	0	0
Map3k11	0.399389	4.25361	4.57305	0.0324787	0.21546	0	0
Ppard	0.399364	2.76033	1.80757	0.178801	0.516087	0	0
Oplah	0.399212	5.06714	6.627	0.0100444	0.109198	0	0
Brf2	0.399147	3.77925	3.61963	0.0571015	0.294809	0	0
Sema3a	0.398778	2.37179	1.44601	0.229169	0.575147	0	0
Znhit2	0.398558	4.51338	5.14684	0.0232887	0.180956	0	0
Lrrc24	0.398519	4.41811	4.74949	0.029307	0.203595	0	0
Cdc37	0.398283	5.24788	7.69232	0.00554563	0.0769984	0	0
Icosl	0.3981	2.92036	2.13031	0.144411	0.470992	0	0
Hlf	0.397643	4.60443	5.16759	0.0230121	0.179919	ts_m218	0
Zfp335	0.397516	4.39071	4.95109	0.0260742	0.192057	0	0
Churc1	0.397233	2.87838	1.95409	0.162147	0.494193	0	0
Fam65b	0.397006	6.6314	9.8386	0.00170888	0.0356167	ts_m218	0
Slx4	0.396939	4.73598	6.08468	0.0136359	0.133195	0	0
Mctp2	0.396849	2.52206	1.42827	0.232046	0.577774	0	0
Ppip5k1	0.396675	5.78723	5.27989	0.0215731	0.174727	0	0
Vps52	0.396537	5.86286	9.02641	0.00266106	0.0478212	0	0
Car5b	0.396515	2.44748	1.39918	0.236862	0.582655	0	0
Ltbp3	0.395983	3.60148	3.15737	0.0755848	0.34076	0	0
Cyp46a1	0.39593	6.09374	7.02644	0.00803147	0.0958762	0	0
Lnx1	0.395829	3.96551	3.82351	0.0505384	0.275821	0	0
Sparcl1	0.395704	9.91805	13.9241	0.000190338	0.00695896	0	0
Cdc14b	0.395545	2.55622	1.66409	0.197051	0.539107	0	0
Atp6v1g2	0.395475	6.73366	15.4387	8.52243e-05	0.00380832	0	0
Ggta1	0.39505	2.65451	1.72302	0.189304	0.529971	0	0
Efnb3	0.395048	6.7201	9.23485	0.00237451	0.0439587	0	0
Pex14	0.394577	4.53883	5.38561	0.0203035	0.168182	0	0
Nkd2	0.394187	3.91515	3.64736	0.0561581	0.291782	0	0
Dpy19l1	0.393956	5.42841	8.05184	0.00454574	0.0677101	0	0
Ovca2	0.393371	3.26012	2.59942	0.106903	0.404787	0	0
Npas2	0.393157	3.41472	2.70113	0.100277	0.391669	0	0
Tm9sf4	0.393113	5.59099	9.28256	0.00231346	0.043171	0	0
Kcnj9	0.393054	5.57711	7.92989	0.00486248	0.0710666	0	0
Ppp1r26	0.392559	4.08674	3.88124	0.0488284	0.271571	ts_m218	0
Eci1	0.392557	3.66879	3.19857	0.0737025	0.337227	0	0
Pim3	0.392547	5.12424	6.97968	0.00824404	0.0974166	0	0
Mcc	0.39254	4.33666	4.64694	0.031109	0.210724	ts_m218	0
Masp1	0.39237	2.92703	2.0035	0.156936	0.486535	0	0
Asb6	0.392143	4.70013	6.00101	0.0142977	0.136804	0	0
Col26a1	0.391991	3.55244	3.05595	0.0804418	0.352826	0	0
Tfip11	0.391825	4.63562	5.03217	0.0248807	0.187159	0	0
Slc7a10	0.391403	4.60102	5.14053	0.0233734	0.181374	0	0
Gpkow	0.391362	4.35997	4.7624	0.029088	0.203146	0	0
Ephb6	0.39121	6.12603	10.0953	0.00148644	0.0326748	0	0
Cdh13	0.390097	5.95859	10.678	0.00108415	0.0260711	0	0
Dhrs4	0.390097	2.52406	1.44212	0.229796	0.575147	0	0
Nubp1	0.389844	3.68859	2.81511	0.0933807	0.378817	0	0
Zfp3	0.389642	3.78921	3.31325	0.0687235	0.32537	0	0
Galns	0.389189	3.19128	2.22672	0.135642	0.456431	0	0
Morn2	0.388893	2.81924	1.82728	0.176449	0.513711	0	0
6030419C18Rik	0.388848	6.73635	11.2835	0.000781972	0.0206382	0	0
Kif13b	0.388833	4.73556	5.01909	0.0250694	0.187159	0	0
Fjx1	0.388539	5.83586	7.63041	0.00573924	0.0788418	0	0
Il17rd	0.388426	3.34114	2.5723	0.108749	0.408747	0	0
Acyp2	0.388367	4.40007	4.64678	0.0311118	0.210724	0	0
Iqsec3	0.388237	7.01665	15.9498	6.50454e-05	0.00314003	0	0
Chd3os	0.388212	5.48183	7.93847	0.00483947	0.0709079	0	0
Ankrd34a	0.388151	4.98852	5.81896	0.0158543	0.144553	ts_m218	0
Mif	0.388112	5.66892	8.71098	0.00316299	0.0536191	0	0
Cacng7	0.38769	5.24211	7.31242	0.00684795	0.0876451	0	0
Cxx1c	0.387638	3.21243	2.37712	0.123124	0.435281	0	0
Sema3g	0.387479	2.71603	1.63119	0.201538	0.541897	0	0
Cpped1	0.387294	4.22762	4.42482	0.0354198	0.227604	0	0
Syt17	0.387159	5.61796	7.02924	0.00801893	0.0958246	0	0
Kcns3	0.386839	3.49382	2.97365	0.0846307	0.361159	0	0
Dusp5	0.386768	3.8211	3.08986	0.0787817	0.34863	0	0
Gabra3	0.38626	4.07818	3.3308	0.0679936	0.323545	0	0
Dcakd	0.385585	5.65272	7.00782	0.00811545	0.0964837	0	0
Tmem108	0.385459	4.1978	2.74134	0.0977826	0.386747	0	0
Slc35b3	0.385315	3.47135	2.70061	0.10031	0.391669	0	0
Tmem132c	0.38507	3.07807	2.15681	0.141939	0.467548	0	0
Med31	0.384943	3.33475	2.60859	0.106286	0.404347	0	0
Glb1l	0.384827	2.95344	2.03577	0.153636	0.482749	0	0
Gsg1l	0.384768	3.91398	3.62284	0.0569916	0.294372	0	0
Garnl3	0.383793	5.45391	8.26718	0.00403681	0.0634831	0	0
Pou3f1	0.383732	5.39561	7.79644	0.00523491	0.0740058	0	0
Psmb10	0.383684	4.7544	5.57931	0.0181739	0.155626	0	0
Apba3	0.383033	4.54684	5.23214	0.0221732	0.176957	0	0
Zdhhc12	0.382318	2.46471	1.40916	0.235195	0.581137	0	0
Abhd10	0.382073	3.40103	2.59963	0.106888	0.404787	0	0
Arnt2	0.382013	7.37554	12.5722	0.000391532	0.0123752	0	0
Mc4r	0.38184	2.9393	1.61629	0.20361	0.544872	0	0
Mief1	0.381676	5.91535	10.0117	0.00155548	0.0332209	0	0
Park2	0.381363	3.85361	3.38472	0.0658034	0.317396	0	0
Pcdha12	0.381303	2.49959	1.4434	0.22959	0.575147	0	bc5_chi_m218
Thap3	0.380691	2.63405	1.50985	0.219162	0.564383	0	0
Cops7b	0.380507	4.49511	4.9688	0.0258085	0.190798	0	0
Gdf10	0.380451	3.25171	2.2689	0.131993	0.450524	0	0
Cers4	0.379786	5.0841	6.84794	0.00887437	0.101572	ts_m218	0
Mfsd2a	0.379147	5.67019	8.1386	0.00433327	0.0657204	0	0
Prcc	0.378763	5.30672	6.04566	0.0139405	0.134739	0	0
Hs1bp3	0.378724	2.80626	1.69995	0.192294	0.533291	0	0
Rfx4	0.378693	2.83349	1.65332	0.198507	0.540685	0	0
Hmces	0.378539	3.58365	2.76791	0.0961714	0.383087	0	0
Zbtb49	0.378143	3.93491	3.44557	0.0634215	0.311315	0	0
Glmn	0.377903	2.63251	1.46697	0.225824	0.571569	0	0
Nfil3	0.377795	3.08166	1.94378	0.163259	0.495665	0	0
Fgd1	0.377679	3.64417	2.77023	0.0960326	0.383087	0	0
Dcps	0.376957	3.24543	2.25468	0.133211	0.451843	0	0
B3glct	0.376932	3.85984	3.28597	0.0698742	0.328376	0	0
Ndufs7	0.376635	5.74164	8.35353	0.0038494	0.0613326	0	0
Grm4	0.376585	3.2869	2.23753	0.134696	0.454824	0	0
Hexdc	0.376467	4.49315	4.61989	0.0316032	0.213057	0	0
Snhg11	0.375768	8.02936	10.0946	0.00148706	0.0326748	0	0
Rnf114	0.375546	5.46491	7.47171	0.00626759	0.0827847	ts_m218	0
Zbtb3	0.375208	2.32331	1.18487	0.276366	0.623937	0	0
Mpc1	0.374783	4.56039	4.99779	0.0253797	0.188778	0	0
Reck	0.374643	2.56379	1.47826	0.224047	0.569985	0	0
Ntng2	0.374254	3.6003	2.63823	0.10432	0.400092	0	0
Slc25a18	0.374098	5.48444	7.5135	0.00612384	0.0816994	0	0
Laptm5	0.373802	4.02257	3.24774	0.071522	0.33207	0	0
Aldh2	0.373686	4.90685	5.43914	0.0196904	0.164387	0	0
Ctdp1	0.373118	4.69833	4.75121	0.0292778	0.203595	0	0
Mrps16	0.372808	4.08502	3.68098	0.0550364	0.28823	0	0
Sema4b	0.372584	3.92151	3.30454	0.0690887	0.326227	0	0
Timm10	0.371982	4.31929	4.17635	0.0409919	0.24694	0	0
Safb2	0.37189	4.26967	3.79898	0.0512838	0.278067	0	0
Ankrd33b	0.371841	6.11646	5.80466	0.0159837	0.14496	0	0
Hivep1	0.371445	4.4624	4.41205	0.035686	0.228308	ts_m218	0
Sdhaf1	0.37132	2.37641	1.3163	0.251257	0.599634	0	0
Mrpl58	0.371019	4.52935	4.80502	0.0283769	0.200892	0	0
Lbh	0.370587	4.78173	5.10271	0.0238885	0.18378	0	0
Mamdc4	0.370498	2.49471	1.21746	0.269861	0.617555	0	0
Diras1	0.37037	6.07713	10.1067	0.00147733	0.0326328	ts_m218	0
Ptpa	0.370331	6.70011	12.5063	0.000405573	0.0126476	0	0
Abcc4	0.370191	3.58754	2.60079	0.106811	0.404787	0	0
Irs2	0.369994	5.12681	6.47479	0.0109415	0.115485	0	0
Atpaf1	0.369573	2.76451	1.62131	0.202909	0.544154	0	0
Zscan20	0.369449	3.25209	2.22024	0.136212	0.456991	0	0
Slc2a9	0.368483	2.46051	1.27852	0.258174	0.606565	0	0
Mier2	0.368332	5.22044	5.82465	0.0158031	0.144553	0	0
Ift43	0.367592	2.49235	1.39866	0.236949	0.582655	0	0
mt-Tc	0.367432	6.33442	6.96277	0.0083223	0.0974891	0	0
Ccdc189	0.367088	2.42593	1.28879	0.256271	0.604401	0	0
Car8	0.366996	2.86656	1.77209	0.183123	0.521427	0	0
Fitm2	0.366962	5.18097	6.35883	0.0116798	0.120019	0	0
mt-Rnr2	0.366818	17.723	15.1462	9.95005e-05	0.00431734	0	0
Nfkbia	0.366662	4.35257	3.89148	0.0485315	0.270565	0	0
Cox10	0.366475	4.14396	3.72954	0.0534581	0.284176	0	0
Scara3	0.366339	4.48439	4.58184	0.0323124	0.21546	0	0
Plekha6	0.366248	5.1978	6.42505	0.0112522	0.117383	0	0
Slc1a4	0.366015	6.61658	11.575	0.000668459	0.0186068	0	0
Cbarp	0.366011	6.57632	10.0706	0.00150655	0.0329042	0	0
Ankzf1	0.365951	4.50243	4.38526	0.0362509	0.230498	0	0
Hsd17b10	0.365914	4.66663	4.53526	0.0332035	0.218075	0	0
Serf2	0.365303	3.86802	3.04578	0.0809473	0.353699	0	0
Tmed9	0.365283	5.69527	8.3395	0.00387922	0.0616394	0	0
Lrrtm3	0.365231	3.92895	3.11832	0.0774164	0.345271	0	0
Ptpra	0.365175	6.99151	14.713	0.000125182	0.00519573	ts_m218	0
Arsa	0.365042	4.6072	4.37806	0.0364044	0.230878	0	0
Pfkfb4	0.364915	4.09278	3.46712	0.0626001	0.308974	0	0
Vezf1	0.364762	4.45608	4.04438	0.0443187	0.257656	0	0
Dhx37	0.364748	3.93907	3.19645	0.0737981	0.3374	0	0
Pnkp	0.364336	4.71472	4.33198	0.0374027	0.233902	0	0
Coq5	0.364152	5.38201	5.93627	0.0148324	0.139725	0	0
Wdr73	0.363907	4.89957	5.72082	0.0167649	0.148691	0	0
G6pc3	0.363771	3.8918	3.1333	0.0767084	0.343172	0	0
Pbxip1	0.363716	5.99437	5.94699	0.0147424	0.139281	0	0
Kat5	0.36362	5.20996	6.48885	0.0108553	0.114887	0	0
Adgrl2	0.363486	5.25641	5.15131	0.0232288	0.180732	0	0
Snord17	0.363426	8.76128	4.1606	0.0413748	0.247686	0	0
Iah1	0.363381	3.4544	2.59313	0.107328	0.405891	0	0
Mpped1	0.363184	7.32182	7.83868	0.005114	0.0730939	0	0
Rin2	0.362943	4.58152	4.08764	0.0431978	0.254389	0	0
Tulp3	0.362706	3.11987	1.95224	0.162345	0.494498	ts_m218	0
Lrfn3	0.362588	3.48573	2.46631	0.116311	0.421644	0	0
Lmf1	0.362197	4.4247	3.75536	0.0526386	0.281763	0	0
Ebag9	0.362116	3.20006	2.04567	0.15264	0.481666	0	0
Fastk	0.361805	5.73716	6.7471	0.00939	0.104888	0	0
Ly75	0.361417	2.82799	1.62849	0.201912	0.542353	0	0
Foxo1	0.361294	3.96243	3.11774	0.0774439	0.345271	0	0
Qpct	0.361292	3.94898	1.80106	0.179584	0.517525	0	0
Tubg1	0.361221	4.90853	5.34914	0.0207325	0.170524	0	0
Clptm1	0.361162	7.34719	11.5092	0.000692524	0.0190943	0	0
Insc	0.361159	2.32934	1.05007	0.30549	0.652653	0	0
Satb2	0.361102	3.41828	2.31452	0.128171	0.443314	ts_m218	0
Ngrn	0.360956	4.95359	5.80832	0.0159506	0.144884	0	0
mt-Cytb	0.360847	8.06628	19.8622	8.32307e-06	0.000530448	0	0
Frem1	0.360683	3.60395	2.55645	0.109845	0.409475	0	0
Gm26165	0.360609	3.0046	1.37893	0.240283	0.586525	0	0
Sstr3	0.360407	5.10868	5.94484	0.0147604	0.139281	0	0
Atxn7l1	0.360203	4.14411	3.54042	0.0598905	0.303066	0	0
Gcn1l1	0.359992	7.24566	13.45	0.000245002	0.00865895	0	0
Tmem39a	0.359919	2.51804	1.27134	0.259515	0.608066	0	0
Arl2	0.359891	4.49525	4.29749	0.0381688	0.236788	0	0
St3gal4	0.3598	4.0351	3.41089	0.0647674	0.315136	0	0
Vasn	0.359675	3.68009	2.70581	0.0999833	0.391179	0	0
Babam1	0.359642	5.4404	7.19165	0.00732438	0.0906838	0	0
Nudt22	0.359595	3.00546	1.87164	0.171287	0.506985	0	0
Dusp16	0.359035	3.34311	2.25179	0.13346	0.45222	0	0
Clec2d	0.358938	3.35468	2.09316	0.14796	0.476122	0	0
Me3	0.358822	5.97456	7.18502	0.00735149	0.0907306	0	0
Cyp2d22	0.358765	3.27901	2.0579	0.151418	0.480888	0	0
Notch3	0.358628	4.26304	3.6063	0.057561	0.296526	0	0
Esd	0.358383	5.33739	6.73363	0.00946121	0.105292	0	0
Med29	0.358347	2.55539	1.25735	0.262153	0.611065	0	0
P4htm	0.358263	5.68835	6.37396	0.0115807	0.119603	0	0
Dgcr14	0.357974	4.87657	4.85617	0.0275475	0.198188	0	0
BC030500	0.357884	3.87097	2.85541	0.091067	0.373923	0	0
Foxp4	0.357634	3.72588	2.41202	0.120407	0.429715	0	0
Lingo2	0.357449	4.83497	3.85934	0.0494699	0.272506	0	0
Dlx1	0.357232	4.46639	4.06775	0.0437095	0.255403	0	0
Ndst3	0.356822	4.52026	3.6752	0.0552276	0.288713	0	0
Gnl1	0.356801	6.59633	9.03326	0.00265111	0.0477649	0	0
Tm4sf1	0.356007	3.9364	3.08584	0.0789766	0.3493	0	0
Elmo1	0.35534	4.96971	5.58309	0.0181347	0.155518	ts_m218	0
Tmem14c	0.355296	4.94971	5.45942	0.0194631	0.163427	0	0
Dlc1	0.355025	5.82201	7.89582	0.00495491	0.0720562	0	0
Slc16a11	0.354848	3.05756	1.83201	0.17589	0.513056	0	0
Tmtc4	0.354581	4.0136	3.16983	0.0750101	0.339729	0	0
Ppp1r11	0.354418	5.47505	7.09869	0.00771403	0.0935226	0	0
Zfp109	0.354313	2.5083	1.22561	0.268263	0.616482	0	0
Tmem117	0.35413	3.31004	1.94011	0.163657	0.496419	0	0
Ints1	0.354126	7.16639	14.3146	0.000154657	0.00591399	0	0
Sall1	0.353997	3.36418	1.99715	0.157595	0.487283	0	0
Plekho1	0.353881	4.72118	4.79543	0.0285354	0.20142	0	0
Gm25099	0.353663	4.06749	2.75733	0.0968095	0.384698	0	0
Pigo	0.353461	4.30945	3.79281	0.0514731	0.278835	0	0
Snph	0.353284	8.05872	5.3561	0.0206499	0.170091	0	0
Tmem121	0.353134	4.24725	3.64716	0.0561649	0.291782	0	0
Dpy19l3	0.353089	5.80324	5.06865	0.0243623	0.185644	ts_m218	0
Meg3	0.352584	9.31207	14.3405	0.00015255	0.00587193	0	0
Nop14	0.352152	2.72638	1.44953	0.228604	0.574985	0	0
Slc35a2	0.351995	4.93078	5.24084	0.0220626	0.176728	0	0
Tnfaip8	0.351743	2.63783	1.40405	0.236047	0.581911	0	0
Grn	0.351723	5.36471	6.29484	0.012109	0.122593	0	0
Tmtc2	0.351516	3.56207	2.43202	0.11888	0.426356	ts_m218	0
Cgref1	0.351483	4.09191	2.42925	0.11909	0.42658	0	0
Sh3rf3	0.351169	4.95658	5.27854	0.0215898	0.174741	0	0
Tceal1	0.351066	3.94815	3.04672	0.0809004	0.353699	0	0
Ydjc	0.350411	4.33863	3.28276	0.0700111	0.328472	0	0
Gm26461	0.350275	4.4787	3.91239	0.0479315	0.26941	0	0
Gm24336	0.350173	5.42833	2.94523	0.0861316	0.3641	0	0
Gm21992	0.349993	2.64012	1.2244	0.268499	0.616636	0	0
Stoml2	0.349883	5.38232	6.79512	0.00914074	0.103806	0	0
Ppt1	0.349534	6.12065	9.05962	0.00261316	0.0472517	0	0
Atxn7l2	0.349499	3.34283	2.10392	0.146922	0.474587	0	0
Pick1	0.34909	5.14155	5.58524	0.0181124	0.155442	ts_m218	0
Cd320	0.348975	4.27601	3.63531	0.0565661	0.292908	0	0
Pcdhb11	0.348838	3.077	1.48462	0.223053	0.569096	0	0
Pknox1	0.348813	4.29331	3.14219	0.0762912	0.342612	0	0
Sap30	0.348533	2.59569	1.28197	0.257533	0.605809	0	0
2010111I01Rik	0.34832	5.82673	7.84643	0.00509212	0.0729747	0	0
Atp13a1	0.348185	6.21878	9.49242	0.00206322	0.0401726	0	0
Tbc1d2b	0.348115	4.15947	3.43679	0.0637594	0.312054	0	0
Dolk	0.34749	4.9965	5.21453	0.0223989	0.178198	0	0
Lrba	0.347194	6.18404	8.88507	0.00287512	0.0504768	0	0
Pdp2	0.34709	3.38055	2.1124	0.14611	0.473357	0	0
Rgs4	0.347065	7.87398	13.9841	0.000184359	0.00680437	0	bc5_chi_m218
Grip2	0.346907	3.25799	1.96649	0.160821	0.492343	0	0
Slc35g2	0.346831	3.64481	2.36341	0.12421	0.436596	0	0
Htr4	0.346573	4.17983	3.37065	0.0663675	0.318537	0	0
Kcnip3	0.346302	5.37771	6.44538	0.0111241	0.116513	ts_m218	0
Xrcc2	0.34629	2.87505	1.49613	0.221268	0.56755	0	0
Gcnt2	0.346036	4.10544	3.27405	0.0703838	0.329673	0	0
Cspg4	0.346027	6.03219	8.57359	0.00341073	0.0568277	0	0
Tnfrsf1a	0.345274	2.3775	1.13303	0.287129	0.635444	0	0
Thoc5	0.345212	4.94023	4.93391	0.0263346	0.192806	0	0
Itgb1bp1	0.345196	4.51242	4.10817	0.0426765	0.252348	0	0
Nxph1	0.34507	5.13617	4.20464	0.0403134	0.244628	0	0
Rcsd1	0.344992	2.98108	1.54684	0.213602	0.557325	0	0
Abcb8	0.344496	5.85672	7.70476	0.00550753	0.0765606	0	0
Plpp7	0.344416	4.47104	3.72104	0.0537311	0.28484	0	0
Fam20a	0.344239	3.61028	2.2998	0.12939	0.445682	0	0
Prrc1	0.343316	3.60526	2.46402	0.116481	0.421644	0	0
Polr3d	0.343288	3.90018	2.78266	0.0952896	0.381683	0	0
Ddx56	0.343148	5.77706	7.03473	0.00799438	0.0956292	0	0
Rxfp3	0.342404	3.58159	2.43663	0.11853	0.426015	0	0
Amacr	0.342288	3.239	1.68479	0.19429	0.53557	0	0
Cib1	0.342183	3.24171	1.65432	0.198372	0.540685	0	0
Rhbdl3	0.34197	4.29779	3.19238	0.0739824	0.337689	0	0
Ulk3	0.341688	3.11777	1.7956	0.180245	0.518044	0	0
Sgms1	0.341667	4.9816	5.25704	0.0218582	0.175694	0	0
Nos1	0.341452	5.66877	6.78468	0.00919434	0.104006	0	0
Cplx1	0.341307	7.20123	12.2953	0.000454106	0.0139009	0	0
Qsox1	0.340951	5.01106	4.53607	0.0331877	0.218075	0	0
Srcap	0.340395	2.86251	1.43259	0.231342	0.576947	0	0
Suclg2	0.340239	3.01041	1.59652	0.206397	0.549039	0	0
Rpusd4	0.340138	3.08992	1.75419	0.185351	0.525205	0	0
Arhgef10	0.340055	4.97774	4.97753	0.0256786	0.190515	0	0
Col4a2	0.339363	6.7816	6.31788	0.0119526	0.121897	0	0
Foxc1	0.339306	2.48022	1.07867	0.298995	0.647092	0	0
Mmp15	0.339292	5.18441	5.44262	0.0196512	0.164295	0	0
Myo1e	0.339254	3.69491	2.25659	0.133047	0.451843	0	0
Rpl29	0.339246	4.89755	4.8447	0.0277312	0.198666	0	0
Gpr108	0.339164	4.02804	3.12987	0.0768699	0.343763	0	0
Rsph9	0.338923	4.26314	3.31927	0.0684723	0.324747	0	0
Tmem175	0.338829	4.54954	3.96199	0.0465387	0.264513	0	0
Chpf2	0.338519	5.91706	6.95236	0.00837089	0.0974891	0	0
Spryd4	0.338308	3.5462	2.26795	0.132075	0.450648	0	0
Fn3k	0.338296	3.68239	2.3709	0.123616	0.4357	0	0
1810037I17Rik	0.338248	4.46662	3.48344	0.0619856	0.307372	0	0
Ptpn23	0.338183	4.57915	3.78414	0.0517404	0.279499	0	0
Dmpk	0.338072	2.40488	1.03973	0.307885	0.655262	0	0
Sec61g	0.3379	2.62382	1.11981	0.28996	0.638278	0	0
Psmf1	0.337726	4.5485	3.89855	0.0483278	0.270565	0	0
Gpr19	0.33751	3.89378	2.58004	0.108219	0.407937	0	0
Gm16001	0.337415	2.35786	0.971631	0.324274	0.66935	0	0
Rbm11	0.337346	3.07378	1.6153	0.203748	0.544941	0	0
Slc3a2	0.337333	6.20666	7.51935	0.00610396	0.0816994	0	0
Extl1	0.337109	6.44947	5.06631	0.0243952	0.185644	0	0
Mtfp1	0.336817	6.27018	7.44686	0.00635472	0.083557	0	0
Cdc26	0.336712	3.33916	1.96342	0.161148	0.492794	0	0
Pom121	0.336494	3.66773	2.28609	0.130539	0.448181	0	0
Lrrc8c	0.335892	4.04405	2.87274	0.0900913	0.372073	0	0
Brd3	0.335826	5.21814	4.90007	0.0268556	0.194913	0	0
Unc119	0.33559	3.80973	2.46448	0.116446	0.421644	0	0
Alms1	0.335564	4.11621	2.891	0.0890759	0.370393	0	0
Bcl10	0.335455	3.84208	2.64078	0.104152	0.399581	0	0
Fkbp2	0.335385	3.26105	1.71904	0.189817	0.530704	0	0
Tsta3	0.335326	3.88898	2.66992	0.102261	0.395719	0	0
Parm1	0.33494	5.21401	5.55684	0.0184086	0.157059	0	0
Kansl1	0.334723	6.0971	6.69323	0.00967797	0.106888	ts_m218	0
Ptgfrn	0.334555	4.49843	3.88488	0.0487228	0.271318	0	0
Calcrl	0.334404	3.48383	1.97547	0.159868	0.490918	ts_m218	0
C2cd4c	0.334368	3.14483	1.49447	0.221525	0.567673	0	0
Plekhg3	0.334129	3.54915	2.02391	0.15484	0.483521	0	0
Csmd2	0.334105	5.94781	7.30695	0.00686883	0.0876451	0	0
Slc6a1	0.334059	8.83841	10.3326	0.00130702	0.0299596	ts_m218	bc5_chi_m218
Ndufa11	0.334027	5.48778	5.697	0.0169939	0.150038	0	0
Tab1	0.333944	5.43364	3.82638	0.0504517	0.275735	0	0
Ankrd55	0.33364	2.4417	0.987622	0.320324	0.666895	0	0
Col23a1	0.333111	3.0733	1.64184	0.200073	0.54153	0	0
Krba1	0.333042	5.82147	7.18502	0.00735149	0.0907306	0	0
Chadl	0.332793	3.96772	2.34233	0.125901	0.438691	0	0
Mkrn3	0.332676	4.01194	2.96906	0.084871	0.361391	0	0
Ssh1	0.33249	4.23	3.147	0.0760669	0.34197	0	0
Slc13a5	0.332481	3.06136	1.48303	0.223302	0.569137	0	0
Selenop	0.332362	7.52986	14.1585	0.000168039	0.00630171	0	0
Asic1	0.332343	5.50377	4.71305	0.0299346	0.206263	ts_m218	0
Gng4	0.332301	5.42859	5.83955	0.0156698	0.144309	0	0
Arsb	0.33228	5.25968	5.36367	0.0205605	0.170069	0	0
Cdo1	0.332151	4.09925	3.01429	0.0825334	0.357706	0	0
Klf15	0.33215	4.12079	2.75198	0.097134	0.385069	0	0
9130011E15Rik	0.332132	4.21145	3.09476	0.0785449	0.348151	0	0
Rhof	0.332098	4.85544	4.15893	0.0414157	0.247686	0	0
Utrn	0.332093	5.44627	5.98328	0.0144421	0.137501	0	0
Atp1b2	0.331951	6.48732	5.06564	0.0244047	0.185644	0	0
Caskin1	0.331639	6.62959	9.92181	0.00163332	0.0343852	ts_m218	0
Slc29a3	0.331591	3.60022	2.06977	0.150244	0.478771	0	0
Pla2g16	0.331483	3.67343	2.36394	0.124169	0.436596	0	0
Dlg5	0.331453	5.32323	5.90288	0.0151161	0.141097	0	0
Ccdc86	0.331428	2.72815	1.16206	0.281039	0.628781	0	0
Slitrk1	0.3314	5.73044	6.36497	0.0116395	0.119816	0	0
Myh14	0.33139	2.34112	0.984649	0.321054	0.667466	0	0
Sparc	0.331283	7.8336	13.4042	0.000251055	0.00882492	0	0
Apopt1	0.331116	3.5295	2.03321	0.153896	0.483015	0	0
Lrrn2	0.331091	6.11315	6.09494	0.0135569	0.132668	0	0
Slc26a4	0.331023	3.47195	2.13735	0.14375	0.469625	0	0
Syvn1	0.33101	4.37752	3.41369	0.0646578	0.314997	0	0
Usp21	0.330576	4.54256	3.51203	0.0609247	0.305488	0	0
Trp73	0.33049	2.35838	0.99359	0.318867	0.665925	0	0
Arhgap4	0.33041	2.65926	1.1753	0.278314	0.626879	0	0
Lamc3	0.330326	4.22999	2.83082	0.092471	0.376421	0	0
Nutf2	0.330274	3.39867	1.93382	0.164342	0.497461	0	0
Kat6b	0.330083	6.00635	7.48035	0.00623758	0.0825754	0	0
Acp6	0.329994	3.64131	2.27205	0.131726	0.450136	0	0
Isy1	0.329963	3.67932	2.31699	0.127967	0.443004	0	0
Fbxo32	0.329932	2.91805	1.4445	0.229412	0.575147	0	0
AI854703	0.329823	4.61813	3.74158	0.0530742	0.283038	0	0
Rn7sk	0.329728	13.7734	6.64212	0.00995955	0.108864	0	0
Bag6	0.329628	7.47662	9.51679	0.002036	0.0401368	0	0
Pold4	0.32962	2.98135	1.55108	0.212977	0.556762	0	0
Hps1	0.329247	3.02501	1.61778	0.203402	0.544599	0	0
Triap1	0.329241	3.4665	2.12029	0.145359	0.472414	ts_m218	0
Uggt2	0.329062	4.8659	4.44387	0.0350268	0.226702	0	0
Cep170b	0.328978	7.23454	9.77388	0.00177008	0.0363459	0	0
Abcd4	0.328821	3.0674	1.43216	0.231412	0.576947	0	0
Apod	0.328471	4.67399	2.96012	0.0853418	0.362469	0	0
Chrnb2	0.328254	6.142	8.37278	0.00380882	0.060936	0	0
Adgrg1	0.328176	5.82219	6.64579	0.00993905	0.108844	0	0
Ninj1	0.328165	3.44815	1.81764	0.177595	0.514917	0	0
Acbd4	0.327975	4.61073	2.3538	0.124978	0.437665	0	0
Ptprt	0.327926	6.67315	8.64011	0.00328841	0.0552633	ts_m218	0
Gm3294	0.327393	3.04717	1.58897	0.207474	0.550447	0	0
Pcdhgc4	0.327227	4.79096	3.94189	0.0470979	0.266264	0	0
Csrp1	0.327202	7.17868	10.2398	0.0013744	0.0310653	0	0
Tmem141	0.327	4.69531	3.81181	0.0508925	0.276976	0	0
Tmem97	0.326982	3.18478	1.78862	0.181094	0.519456	0	0
Zcchc12	0.326256	5.21089	2.65687	0.103103	0.396904	0	0
Loxl1	0.325658	2.51698	1.09635	0.295068	0.643248	0	0
Elfn2	0.325521	6.29833	7.88797	0.00497646	0.0721896	ts_m218	0
Fam107a	0.325095	7.7888	9.69154	0.00185119	0.0376796	0	0
mt-Tn	0.324515	2.48477	1.05399	0.30459	0.651703	0	0
Mark4	0.324362	4.84432	4.07688	0.043474	0.254763	0	0
Rnf152	0.323983	2.99361	1.44287	0.229675	0.575147	0	0
Adcy3	0.323903	5.53266	6.11688	0.0133897	0.131392	0	0
A930017M01Rik	0.323398	2.63374	1.13569	0.286566	0.635316	0	0
Fam228b	0.323373	3.16247	1.51739	0.218015	0.562473	0	0
Phf5a	0.32321	3.96099	2.53462	0.111374	0.412196	0	0
Tmem201	0.323091	5.51047	5.83262	0.0157317	0.144472	0	0
Ybey	0.322989	2.71646	1.2352	0.266398	0.61549	0	0
Ilvbl	0.322988	3.91844	2.17431	0.140333	0.46484	0	0
Aig1	0.322854	5.29679	4.5339	0.0332297	0.218097	0	0
Bag2	0.322829	3.13233	1.63947	0.200398	0.541735	0	0
Gtf2f1	0.322786	5.38878	4.58642	0.0322262	0.21546	0	0
Slc22a15	0.322546	3.04922	1.44281	0.229685	0.575147	0	0
Anxa2	0.322263	3.4509	1.74673	0.186288	0.526707	0	0
Mzt2	0.322233	4.33148	3.24346	0.0717092	0.332278	0	0
Raver1	0.321837	4.09704	2.58551	0.107846	0.407321	0	0
Trmt12	0.321834	3.55405	2.00076	0.15722	0.486896	0	0
Khsrp	0.321713	5.60891	6.18032	0.0129179	0.128551	0	0
Nxt1	0.321688	2.90134	1.30311	0.253647	0.602323	0	0
Lrch3	0.321687	5.58711	6.06189	0.013813	0.134139	0	0
Kcnb1	0.321672	5.41794	5.26822	0.0217182	0.175048	ts_m218	0
Chchd6	0.321639	5.13561	3.83161	0.0502945	0.275263	0	0
Trim3	0.321616	6.51942	9.4609	0.00209898	0.0404618	0	0
St8sia5	0.32154	5.12799	4.6485	0.0310807	0.210724	0	0
Selenoh	0.321265	4.27129	2.91676	0.0876635	0.367909	0	0
Nsmce2	0.321136	3.32376	1.70776	0.191276	0.532168	0	0
Smim19	0.320737	3.1326	1.49718	0.221106	0.56751	0	0
Emp2	0.320569	4.75231	3.86184	0.0493961	0.272506	0	0
Lrfn1	0.32038	4.48105	3.38154	0.0659303	0.317602	0	0
Zfpl1	0.320302	3.38175	1.77307	0.183002	0.521427	0	0
Nrsn1	0.320173	5.74398	6.21765	0.0126483	0.126515	0	0
Btbd2	0.320061	5.92922	6.96992	0.00828911	0.0974891	0	0
Lama3	0.32003	2.65134	1.06635	0.30177	0.649045	0	0
Tmem243	0.320001	3.42964	1.83576	0.175448	0.512508	0	0
Sulf2	0.319958	6.99881	9.33194	0.00225194	0.0424303	ts_m218	0
Slco2a1	0.319887	2.80895	1.21753	0.269846	0.617555	0	0
Arhgap1	0.319339	5.39659	5.52243	0.0187742	0.159162	0	0
Sfi1	0.319319	3.71923	2.11117	0.146228	0.473606	0	0
Rasgrf1	0.318937	8.24035	15.4692	8.38601e-05	0.00376177	0	0
Tnrc18	0.318906	6.00622	7.33461	0.00676393	0.0869598	0	0
Colgalt2	0.318848	3.27336	1.64833	0.199187	0.541191	0	0
A230050P20Rik	0.318537	4.5217	2.9746	0.0845809	0.361136	0	0
Rassf1	0.318349	2.80944	1.22159	0.269048	0.616725	0	0
Clic1	0.318224	3.62867	2.07323	0.149904	0.478209	0	0
Spsb4	0.318173	2.4393	1.0012	0.31702	0.663893	0	0
Fam69a	0.317974	4.07978	2.61879	0.105605	0.403466	0	0
Pnpla6	0.317602	5.683	5.88601	0.0152616	0.141943	0	0
Ogdhl	0.317513	6.21092	7.72319	0.00545158	0.0760548	0	0
Tmem100	0.317462	4.36331	3.0852	0.0790074	0.349304	0	0
Ndufaf5	0.317144	4.91839	4.29561	0.0382109	0.236923	0	0
E130309D02Rik	0.316331	3.71421	2.20286	0.137755	0.459434	0	0
Slc15a4	0.316252	5.04462	3.56109	0.0591487	0.300239	0	0
Ten1	0.316231	4.00144	2.48145	0.115196	0.420248	0	0
Grk3	0.3162	6.5698	8.5292	0.00349493	0.057608	0	0
Slirp	0.316079	3.46617	1.72165	0.189481	0.530339	ts_m218	0
Gjb2	0.315809	2.68474	1.12243	0.289397	0.637679	0	0
Cyb561d2	0.315264	3.87936	2.25346	0.133316	0.451955	0	0
Bfsp2	0.315139	3.28216	1.63394	0.20116	0.54183	0	0
Ak1	0.314659	7.08894	10.7285	0.001055	0.0257415	0	0
Fam105a	0.314544	4.14353	2.84884	0.0914399	0.374329	0	0
Fam69c	0.314469	3.40589	1.77534	0.182723	0.521178	0	0
Yif1b	0.314396	4.09274	2.71924	0.0991452	0.389337	0	0
Dtx1	0.313941	6.22127	7.93436	0.00485048	0.07098	0	0
Slc37a2	0.31393	2.34272	0.89982	0.34283	0.683149	0	0
Dym	0.313417	5.20311	4.33315	0.037377	0.233867	0	0
Hpcal1	0.313378	3.52903	1.908	0.167185	0.501384	0	0
Pinx1	0.312333	2.77706	1.14109	0.285423	0.634575	0	0
Lgals3bp	0.312192	2.84516	1.28801	0.256416	0.604401	0	0
Unc5a	0.312096	5.53936	5.02287	0.0250147	0.187159	0	0
Mboat7	0.311965	5.96258	6.77352	0.009252	0.104006	0	0
Fuca2	0.311297	4.2494	2.82408	0.0928598	0.37736	0	0
Sys1	0.311217	4.81296	3.93591	0.0472655	0.266566	ts_m218	0
Rpl23a	0.310744	3.82884	2.20535	0.137532	0.45933	0	0
Sdc2	0.310518	4.3665	2.81427	0.0934293	0.378882	ts_m218	0
Nfrkb	0.310439	5.36492	5.18701	0.0227563	0.17945	0	0
Nwd1	0.309926	6.82431	9.91279	0.00164134	0.0344918	0	0
Ifngr1	0.309754	3.37772	1.77258	0.183063	0.521427	0	0
Arfgap2	0.309584	4.79631	3.12778	0.0769685	0.344072	0	0
Fbxo16	0.309572	2.60531	0.876068	0.349281	0.689555	0	0
Dennd1a	0.309355	5.2363	4.28951	0.0383482	0.237019	0	0
Cdh6	0.309127	2.77323	1.19337	0.274651	0.622383	0	0
Fiz1	0.308948	3.71183	1.935	0.164212	0.497316	0	0
Grhl1	0.3089	4.77908	3.57419	0.0586841	0.299351	0	0
Oprl1	0.308708	6.07338	7.43591	0.00639349	0.0839722	0	0
Grwd1	0.308443	4.50442	2.97434	0.0845944	0.361136	0	0
Rasa2	0.308109	5.52877	4.04568	0.0442845	0.257656	0	0
Esyt1	0.307724	3.4881	1.74326	0.186726	0.526841	0	0
Il17ra	0.307675	2.63465	1.1033	0.293542	0.641556	0	0
R3hcc1l	0.307634	3.73796	2.02386	0.154845	0.483521	0	0
Ubac2	0.307628	5.52048	5.59477	0.0180142	0.15507	0	0
Rps15	0.307503	7.07072	8.54079	0.00347275	0.0574507	0	0
Umad1	0.307243	3.34599	1.69561	0.192863	0.533748	0	0
Cp	0.307181	3.26372	1.636	0.200875	0.541735	0	0
Traf2	0.30712	3.50441	1.8027	0.179387	0.517229	0	0
Pdrg1	0.306956	3.76101	1.94758	0.162847	0.495156	0	0
Lactb2	0.306907	3.64725	1.93093	0.164657	0.497598	0	0
Usp35	0.306863	3.89282	2.25657	0.133048	0.451843	0	0
Ltbp4	0.306685	2.58092	0.904872	0.341479	0.681847	0	0
Plekhg2	0.306489	2.55575	0.929413	0.335015	0.677525	0	0
Cpeb1	0.306428	4.94753	3.26791	0.0706475	0.330245	0	0
Nkain4	0.306406	4.10566	2.54875	0.110382	0.410648	0	0
Zbed5	0.305953	2.42645	0.802868	0.370237	0.70821	0	0
Ramp1	0.305838	5.98191	4.22009	0.039948	0.243582	0	0
Nt5dc2	0.305803	3.08941	1.32216	0.250205	0.59847	0	0
Ace	0.305439	2.82654	1.17471	0.278436	0.626883	0	0
Gm25776	0.305282	3.98916	1.48973	0.222258	0.56813	0	0
Crip2	0.305226	5.12176	4.20911	0.0402075	0.244439	0	0
Slc16a2	0.304872	6.06379	7.04047	0.0079688	0.0954211	0	0
Zfp839	0.304673	3.08527	1.22769	0.267857	0.616482	0	0
Zfp362	0.304611	2.9858	1.26258	0.261163	0.610532	0	0
Katnb1	0.30461	5.74975	5.48865	0.0191404	0.161413	0	0
Pnpo	0.304434	5.35993	4.30522	0.0379956	0.236217	0	0
Rest	0.30436	3.42734	1.69517	0.192921	0.533748	0	0
Casp9	0.304357	4.01859	2.45042	0.117493	0.423458	0	0
Cul9	0.30424	6.17046	7.28022	0.0069718	0.0880705	0	0
Qrsl1	0.304214	4.12276	2.68807	0.101102	0.39397	0	0
Pfdn5	0.30387	6.66399	9.21656	0.00239836	0.0441811	0	0
Nckap1l	0.303801	4.07382	2.36899	0.123767	0.435969	0	0
Htr7	0.30355	3.19012	1.37507	0.240943	0.587154	ts_m218	0
Dhrs7b	0.303538	5.18252	3.70924	0.0541119	0.285698	0	0
Galnt13	0.303274	4.04503	2.27814	0.13121	0.448899	ts_m218	0
Fgfr2	0.303196	5.14702	4.32329	0.0375941	0.234973	ts_m218	0
Sult1a1	0.303085	2.99229	1.24016	0.265441	0.614429	0	0
Med17	0.302878	5.31832	4.39363	0.0360734	0.229778	ts_m218	0
Plec	0.302832	7.6422	7.59935	0.00583893	0.07937	0	0
Gpr62	0.302728	3.08881	1.34829	0.245577	0.594471	0	0
Morn1	0.302597	2.68044	0.963256	0.326368	0.671401	0	0
Vps37c	0.302429	4.13752	2.56121	0.109515	0.409337	0	0
Rgs12	0.302274	6.03482	5.08787	0.0240937	0.184872	0	0
Slc17a6	0.302269	4.23028	2.78676	0.095046	0.381456	ts_m218	bc5_chi_m218
Slc6a7	0.30224	6.18296	5.33335	0.0209211	0.171471	0	0
Gpr137	0.302133	5.77878	4.17701	0.040976	0.24694	0	0
Agbl5	0.302125	3.63215	1.86769	0.17174	0.506985	0	0
Csrp2	0.30186	3.86616	2.05907	0.151302	0.480696	0	0
Clstn3	0.301685	8.9348	18.0348	2.16909e-05	0.00122806	0	0
Tmem11	0.301409	4.00059	2.15107	0.14247	0.46767	0	0
Erlin1	0.301379	3.61674	1.82546	0.176665	0.513826	0	0
Orc4	0.301349	5.18361	4.62438	0.0315206	0.212623	0	0
Pcdhgb6	0.301339	3.53576	1.70075	0.19219	0.533291	0	0
Zfp287	0.301229	3.6538	1.82022	0.177287	0.51448	0	0
F3	0.30108	3.88442	2.12787	0.144642	0.471532	0	0
Alkbh1	0.300917	3.94672	2.306	0.128876	0.444437	0	0
Crat	0.300894	4.97075	3.94662	0.0469655	0.265809	0	0
Rpl22l1	0.300643	4.82449	3.33786	0.0677024	0.322818	0	0
Gt(ROSA)26Sor	0.300201	2.73215	1.05517	0.30432	0.651406	0	0
Kl	0.299985	3.62941	1.22545	0.268294	0.616482	0	0
Plat	0.299582	6.24046	7.32447	0.00680219	0.087276	0	0
Zfp787	0.299191	3.79567	2.09771	0.14752	0.475416	0	0
Rptor	0.299164	6.23858	6.3411	0.0117972	0.120588	0	0
Mus81	0.299134	4.99008	4.16233	0.0413326	0.247686	0	0
Tpst2	0.299092	5.01145	3.85905	0.0494785	0.272506	0	0
Cbx2	0.298903	2.51094	0.877995	0.348751	0.689521	0	0
Stat5b	0.298882	4.16166	2.51961	0.112439	0.414598	0	0
Clec2l	0.298608	6.1297	6.46646	0.0109929	0.115852	0	0
Daglb	0.298608	5.48729	5.12638	0.0235648	0.182108	0	0
Fuca1	0.298604	5.04511	3.99548	0.0456224	0.261739	0	0
Arhgap31	0.298586	4.88406	3.76882	0.0522164	0.280645	0	0
Htr5a	0.298537	3.42816	1.46089	0.226789	0.572024	0	0
Fis1	0.298422	6.67852	8.51167	0.00352877	0.058048	0	0
Hdac7	0.298237	2.63778	0.855303	0.355056	0.694411	ts_m218	0
Ankrd42	0.298165	3.78926	1.98386	0.158984	0.48991	0	0
Pik3r2	0.297838	7.31503	4.81996	0.0281321	0.200064	0	0
Csf1	0.297728	3.50226	1.70071	0.192195	0.533291	0	0
Clvs1	0.297548	4.45414	2.85243	0.091236	0.374151	0	0
Shd	0.297523	4.19596	2.63341	0.104636	0.401175	0	0
Slc8a3	0.297488	4.78415	3.54216	0.0598274	0.302982	0	0
Mccc1	0.297452	3.53335	1.69917	0.192396	0.533291	0	0
Sik3	0.297402	6.22249	6.95447	0.00836101	0.0974891	0	0
Psmg2	0.297169	3.57497	1.81396	0.178034	0.515116	0	0
Zfp169	0.297088	4.10876	2.25735	0.132982	0.451843	0	0
Hist2h4	0.297087	4.04863	1.27124	0.259535	0.608066	0	0
Slc39a7	0.297034	2.32498	0.721949	0.395505	0.728947	0	0
Rpl37a	0.297012	6.70987	7.74725	0.00537945	0.0754093	0	0
Slc9a1	0.296965	4.22784	2.44947	0.117565	0.423458	0	0
Gpi1	0.296867	8.02335	12.9054	0.000327634	0.0108249	0	0
Ctc1	0.296791	4.93948	2.66194	0.102775	0.396574	0	0
Atat1	0.296658	4.11204	2.31099	0.128462	0.443664	0	0
Smim10l2a	0.296465	4.59603	3.22948	0.0723235	0.334467	0	0
Wbscr27	0.296432	2.4046	0.787246	0.374934	0.711844	0	0
Crlf2	0.296431	3.1098	1.2971	0.254744	0.602762	0	0
Eif3k	0.296297	6.39514	7.64252	0.00570083	0.0784992	0	0
Papss2	0.296237	2.74445	0.940599	0.332124	0.675778	0	0
Cyb5r1	0.296063	3.5367	1.71302	0.190594	0.531413	0	0
Slc27a1	0.295932	6.20795	6.95252	0.00837012	0.0974891	0	0
Commd5	0.295829	4.0331	2.23394	0.135009	0.455352	0	0
Capn10	0.295634	5.5297	5.03808	0.024796	0.187159	0	0
Eif2b4	0.295398	5.02335	3.21351	0.0730325	0.336272	0	0
Dscaml1	0.295285	5.90653	5.95193	0.0147012	0.139178	0	0
Zfp13	0.295235	4.6354	2.90407	0.0883562	0.369222	0	0
Itgb5	0.295221	5.52998	4.52286	0.033445	0.21914	0	0
Slc25a39	0.295101	5.54643	5.10032	0.0239215	0.18386	0	0
Fos	0.294993	3.59465	1.56824	0.210463	0.553842	0	0
Cdc14a	0.294897	2.38091	0.854241	0.355355	0.694411	0	0
Gm24044	0.294849	4.05709	1.79063	0.18085	0.519156	0	0
Cabin1	0.294779	6.68093	7.41154	0.00648067	0.0848306	0	0
Dchs1	0.294729	6.00282	5.07515	0.0242712	0.18528	0	0
Snora23	0.294679	5.42942	1.66294	0.197206	0.539151	0	0
Dvl2	0.294464	4.12021	2.37427	0.12335	0.435419	0	0
Cherp	0.294206	3.7477	1.84393	0.174491	0.51128	0	0
Lamtor2	0.29403	3.54532	1.62885	0.201862	0.542353	0	0
Myl9	0.294024	3.98585	2.25781	0.132942	0.451843	0	0
Cacnb1	0.293894	6.544	8.14877	0.00430903	0.0654378	0	0
Ampd3	0.293809	3.56154	1.53716	0.21504	0.558952	0	0
Mtss1l	0.293648	5.89283	5.78821	0.016134	0.145643	0	0
Bcr	0.293502	6.53246	5.17986	0.0228502	0.179696	0	0
Fam216a	0.293342	4.34172	2.69348	0.100759	0.393029	0	0
Hcn3	0.293277	3.34006	1.42301	0.232909	0.578416	ts_m218	0
Pnkd	0.293088	6.01053	5.82532	0.0157971	0.144553	0	0
Syt13	0.292843	7.8318	7.50365	0.0061574	0.0816994	ts_m218	0
Synpo	0.292697	6.07198	4.61196	0.0317498	0.213551	0	0
Lrig1	0.292621	5.89619	5.16099	0.0230998	0.180233	0	0
Fbxo7	0.292512	4.86725	3.36232	0.0667042	0.319758	0	0
Cramp1l	0.292397	5.31234	4.51798	0.0335404	0.219408	0	0
Poldip3	0.2921	6.54382	4.57658	0.0324119	0.21546	0	0
Atp8b2	0.292062	6.43401	4.53825	0.0331455	0.218075	0	0
Brpf3	0.291933	4.03496	1.98986	0.158356	0.488621	ts_m218	0
Rusc1	0.291789	6.10093	5.507	0.0189405	0.159986	0	0
Znrd1	0.291767	3.51216	1.65977	0.197634	0.539688	0	0
Trim9	0.291757	7.39241	8.87771	0.00288674	0.0504768	ts_m218	0
Sel1l3	0.291516	5.95166	5.07491	0.0242746	0.18528	0	0
Vegfa	0.291447	5.07939	3.22576	0.0724882	0.334728	0	0
Dyrk1b	0.290416	4.16796	2.08703	0.148554	0.476763	0	0
Engase	0.290215	3.75532	1.561	0.211519	0.555242	0	0
Slc9a5	0.290207	3.05726	1.24476	0.264556	0.613668	0	0
Eif2d	0.2902	4.64526	3.17779	0.0746457	0.339316	0	0
Zfp1	0.290024	3.5912	1.67401	0.195723	0.537489	0	0
Dock2	0.289881	2.75257	0.918033	0.337992	0.679421	0	0
Acat2	0.289865	5.17792	3.82021	0.0506378	0.276105	0	0
Pim2	0.289801	3.70567	1.78673	0.181325	0.519629	0	0
Scrg1	0.289796	3.43075	1.4327	0.231324	0.576947	0	0
Casc3	0.289655	4.46706	2.84672	0.0915606	0.374439	0	0
Lzts1	0.289629	6.48344	5.86159	0.0154748	0.14324	0	0
Gga1	0.289417	4.9762	3.85989	0.0494535	0.272506	0	0
Plxnb1	0.289403	7.06652	9.12111	0.00252677	0.0459745	0	0
Ndufb4	0.289393	3.45736	1.56931	0.210307	0.553842	0	0
Cic	0.289059	6.31926	4.71267	0.0299411	0.206263	0	0
Daxx	0.288783	4.80864	3.40339	0.0650627	0.31556	0	0
Pcdh8	0.28872	5.95113	5.53434	0.0186468	0.158627	ts_m218	0
Arfrp1	0.288691	3.67844	1.7308	0.188308	0.52846	0	0
Trim66	0.288449	3.28154	1.31306	0.251841	0.599922	0	0
Zfp277	0.288367	4.14109	2.4313	0.118934	0.426356	0	0
Timm9	0.288068	3.89417	1.85227	0.17352	0.510279	0	0
Acad11	0.288052	4.55202	2.90009	0.0885744	0.369736	0	0
Fgfr3	0.287722	6.98268	8.72471	0.00313927	0.0536191	0	0
Dtx2	0.287543	2.93187	1.0081	0.315359	0.661901	0	0
Pde4a	0.287223	5.44527	3.89382	0.0484641	0.270565	0	0
Abcg4	0.287102	5.45949	4.08541	0.043255	0.254389	ts_m218	0
Eif3h	0.286997	5.54782	4.40536	0.0358261	0.228703	0	0
Rpa3	0.28693	3.1191	1.19124	0.275079	0.622597	0	0
Map3k9	0.286721	5.75918	4.51692	0.0335612	0.219408	0	0
Plod1	0.286712	5.32277	4.04382	0.0443332	0.257656	0	0
Atg2a	0.286711	5.59508	3.40824	0.0648716	0.315295	0	0
Nsmce1	0.286591	3.70276	1.7467	0.186292	0.526707	0	0
Slc7a5	0.286461	5.45573	4.60862	0.0318116	0.213843	0	bc5_chi_m218
Slit2	0.28643	5.61154	4.43698	0.0351684	0.226798	ts_m218	0
Med21	0.286373	3.85683	2.05764	0.151445	0.480888	0	0
Srp54b	0.286352	2.94692	1.16262	0.280922	0.628781	0	0
Cds1	0.286159	5.94782	2.51318	0.112898	0.415109	0	0
Spsb3	0.286137	2.82216	0.92523	0.336105	0.678655	0	0
Rnf167	0.286113	5.67079	4.4086	0.0357582	0.22852	0	0
Ldb3	0.285991	2.43573	0.741905	0.389051	0.723074	0	0
Atp6v0e	0.28597	4.90478	3.39758	0.065292	0.316272	0	0
Lmtk3	0.285747	6.26998	5.70746	0.0168929	0.149373	0	0
Col4a1	0.285614	7.43564	9.501	0.0020536	0.0401368	0	0
Tfeb	0.285544	3.37126	1.44235	0.22976	0.575147	0	0
Ppp1r15a	0.285502	3.52792	1.55085	0.21301	0.556762	0	0
Ptprb	0.285316	5.09952	3.53625	0.0600409	0.303273	0	0
Mid2	0.285291	4.16719	2.30041	0.12934	0.445639	ts_m218	0
Rsad1	0.285229	3.17971	1.32351	0.249963	0.598259	0	0
mt-Nd6	0.285216	5.28713	3.7114	0.0540422	0.285459	0	0
Med15	0.285215	4.81447	2.79578	0.0945127	0.380733	0	0
Ski	0.285179	7.21838	8.84685	0.00293595	0.0510866	ts_m218	bc5_chi_m218
Atp5sl	0.285065	4.32598	2.50163	0.113728	0.416608	0	0
Mrpl10	0.284763	5.09262	2.96067	0.0853128	0.362469	0	0
Adcy5	0.284547	6.94092	8.12468	0.00436668	0.0660467	0	0
Magi1	0.284273	6.08847	5.25304	0.0219084	0.175977	0	0
Tpp1	0.284241	4.72447	3.1	0.0782923	0.347591	0	0
Slc2a3	0.284192	7.79562	7.0893	0.00775457	0.0938331	0	0
Ptpdc1	0.284057	4.80375	3.20679	0.0733331	0.336933	0	0
Inpp4a	0.283894	6.76548	7.72595	0.00544326	0.0760297	0	0
Med11	0.28364	2.82418	0.970725	0.324499	0.66935	0	0
Rab27a	0.283527	2.35267	0.71268	0.398556	0.731333	0	0
6330403K07Rik	0.283451	6.89939	8.96316	0.00275478	0.049052	0	0
Dapk3	0.28342	4.76276	2.44965	0.117551	0.423458	0	0
Fbxo42	0.283306	4.6713	2.97036	0.0848032	0.361366	0	0
Mxd1	0.283027	4.24028	2.16716	0.140986	0.46621	0	0
Nudt17	0.282996	3.2447	1.21438	0.270467	0.618521	0	0
Rpap1	0.282994	4.68026	2.90108	0.0885205	0.369644	0	0
Elmsan1	0.282617	4.48178	2.41693	0.12003	0.428894	ts_m218	0
Dguok	0.282605	3.72216	1.66102	0.197466	0.539403	0	0
Ubxn8	0.282546	3.71652	1.5943	0.206713	0.549428	0	0
Cd3eap	0.282527	3.54289	1.47122	0.225153	0.571222	0	0
Aurkaip1	0.282448	5.46187	3.30489	0.069074	0.326227	0	0
Phkb	0.282408	4.92181	3.53247	0.0601781	0.303467	0	0
Bahd1	0.282387	4.69605	2.95751	0.0854795	0.36279	ts_m218	0
2019-09-09	0.282306	6.4517	6.61286	0.0101245	0.109639	0	0
Ube2g2	0.282073	4.96597	3.10834	0.0778922	0.346607	0	0
Med12	0.281449	4.77112	2.81051	0.0936487	0.379376	0	0
Pomgnt1	0.28138	6.07627	5.12353	0.0236035	0.182189	0	0
Kcng2	0.280992	4.61743	2.87353	0.0900471	0.372035	0	0
Plxnb2	0.280966	6.18519	5.74846	0.0165031	0.147265	0	0
Pcdhb21	0.280543	2.86609	1.01528	0.313642	0.660885	0	0
Mrps18a	0.280483	5.0449	3.31235	0.0687611	0.32537	0	0
Dhx35	0.280343	4.49042	2.43734	0.118477	0.425956	0	0
Slc39a12	0.280341	6.15838	5.81777	0.015865	0.144553	0	0
Mlst8	0.279699	4.58256	2.50155	0.113734	0.416608	0	0
Fat1	0.279568	6.50336	7.08889	0.00775634	0.0938331	0	0
Gm10855	0.279537	2.65762	0.840512	0.359251	0.697742	0	0
Gak	0.279033	7.22895	6.86337	0.00879804	0.100797	0	0
Thoc6	0.278906	2.65214	0.826248	0.36336	0.702214	0	0
Ephb3	0.278815	4.34103	2.40616	0.120859	0.4308	0	0
Dock6	0.278802	3.89236	1.82988	0.176142	0.51317	0	0
Ttyh2	0.27879	5.26542	3.65759	0.0558144	0.290855	0	0
Wipf1	0.278605	2.47033	0.72015	0.396095	0.729521	0	0
Gas2	0.278574	3.78884	1.75214	0.185608	0.525553	0	0
Pcdhga8	0.278425	3.58221	1.60574	0.205091	0.546809	0	0
Chst1	0.278389	6.93432	5.99438	0.0143516	0.137086	0	0
Grk2	0.27788	7.4439	7.73184	0.00542556	0.0759643	0	0
Galk1	0.277855	3.90729	1.89886	0.168206	0.503152	0	0
Dusp18	0.277758	4.04673	2.02336	0.154896	0.483521	0	0
Arap1	0.277595	4.12753	2.10385	0.146929	0.474587	0	0
Gm25788	0.277205	2.82663	0.797074	0.37197	0.708754	0	0
Pkd1	0.277096	7.52406	7.91443	0.00490421	0.0714972	0	0
Ttyh3	0.277093	6.76904	7.07927	0.0077981	0.0940529	ts_m218	0
Spg11	0.277043	5.26552	3.70766	0.0541634	0.28584	0	0
Ptprn	0.276936	7.59704	8.99273	0.00271056	0.0484866	0	0
Txndc11	0.276839	5.15873	3.66973	0.0554091	0.289403	0	0
Dbnl	0.276756	5.58598	3.89409	0.0484562	0.270565	0	0
Ccdc97	0.276694	4.06549	1.9266	0.165131	0.498298	0	0
Shisa5	0.276483	4.76067	3.0203	0.0822284	0.356649	0	0
Col5a1	0.276478	3.21585	1.23302	0.266821	0.616101	0	0
Fam53c	0.276472	5.53306	3.95451	0.0467458	0.265068	0	0
Plin2	0.276208	3.11327	1.02384	0.31161	0.658856	0	0
3110082I17Rik	0.276203	2.49275	0.717093	0.397099	0.730154	0	0
Pgm5	0.276197	2.70244	0.901811	0.342296	0.682672	0	0
Ogdh	0.276171	8.05085	9.81363	0.00173223	0.0358221	0	0
Lekr1	0.276049	2.96924	0.942389	0.331664	0.675314	0	0
Zc3h18	0.275846	5.11343	3.35286	0.0670885	0.320678	0	0
Ciz1	0.275691	4.45363	2.438	0.118427	0.425906	0	0
Smad2	0.2756	4.72005	2.9765	0.0844817	0.361136	0	0
Aldh16a1	0.275542	2.86653	0.95695	0.327956	0.672934	0	0
Ddr2	0.275417	3.02233	1.07956	0.298797	0.646932	0	0
Atp13a2	0.275158	7.58179	9.30452	0.0022859	0.0429565	0	0
Fam193a	0.275133	5.56014	3.9163	0.0478199	0.269042	0	0
Mms19	0.274341	5.48165	3.50939	0.0610218	0.305652	0	0
Nuak1	0.274183	5.6133	4.35481	0.0369047	0.232659	0	0
Apc2	0.27417	7.38962	9.84591	0.0017021	0.0355764	0	0
Wdr92	0.274142	3.2779	1.2724	0.259316	0.608043	0	0
Trmu	0.274056	4.25555	2.06228	0.150984	0.480563	0	0
mt-Co1	0.274038	11.1828	22.7974	1.80013e-06	0.000140905	0	0
Hs6st2	0.273958	4.27658	2.15517	0.14209	0.467607	0	0
Osbpl7	0.273903	3.55397	1.46214	0.22659	0.572016	0	0
Zfp940	0.273887	3.95444	1.81727	0.177639	0.514917	0	0
Cd63	0.273882	3.4375	1.34769	0.245682	0.594603	0	0
Hus1	0.273877	4.04207	1.88964	0.169243	0.504184	0	0
Tk2	0.273865	4.60863	2.49686	0.114074	0.41759	0	0
Samd14	0.273824	5.32036	3.39672	0.0653263	0.316272	0	0
Ly86	0.273443	2.35567	0.635077	0.425499	0.750675	0	0
Egr3	0.273293	3.66543	1.53845	0.214849	0.558798	0	0
Hepacam	0.273277	4.53354	2.53431	0.111395	0.412196	0	0
Col3a1	0.273034	5.93592	4.38209	0.0363184	0.230583	0	0
Slc35f5	0.272926	4.23371	2.24453	0.134088	0.453689	0	0
Pcdhgc5	0.272837	6.2843	6.15951	0.0130708	0.129519	0	0
Ston2	0.272673	2.92985	0.910567	0.339964	0.680804	0	0
Fam189b	0.272621	3.49309	1.42989	0.231783	0.577502	0	0
Samd10	0.272614	3.26152	1.06866	0.301249	0.648976	0	0
Hint1	0.272544	6.97274	7.52613	0.00608102	0.0815207	0	0
Ficd	0.272418	3.48916	1.3308	0.248662	0.597648	0	0
Fscn1	0.2724	6.89042	7.52724	0.00607728	0.0815207	0	0
Tulp4	0.272298	8.14539	6.02343	0.0141172	0.135849	0	0
Rab3gap2	0.272271	6.49155	5.32974	0.0209645	0.17158	0	0
Zbtb7a	0.272239	5.16321	3.38286	0.0658778	0.317602	0	0
Atp6ap1	0.272181	7.66724	9.45795	0.00210236	0.0404618	0	0
Polr2e	0.271989	5.71608	4.15821	0.0414332	0.247686	0	0
Gm26493	0.27194	4.66011	0.9773	0.322866	0.668606	0	0
Fam98c	0.271923	2.82235	0.934305	0.333747	0.677073	0	0
Dxo	0.271893	3.7744	1.61295	0.204078	0.545257	0	0
Egln1	0.271843	5.53611	3.70007	0.0544103	0.286427	0	0
Ubb	0.271825	7.31737	3.89262	0.0484987	0.270565	0	0
Ap5s1	0.271824	3.86234	1.67604	0.195451	0.536995	0	0
Tbc1d1	0.271742	5.9038	3.87621	0.0489751	0.271739	0	0
Daam2	0.271617	6.09694	5.27257	0.021664	0.174856	0	0
Slc25a15	0.271551	3.52805	1.45093	0.228379	0.574792	0	0
Mfsd10	0.271089	3.59135	1.54743	0.213515	0.557222	0	0
Hipk2	0.270985	5.05164	3.17714	0.0746755	0.339316	0	0
Casz1	0.270715	2.48616	0.609142	0.435111	0.75737	0	0
Eif4e3	0.270674	3.88149	1.70403	0.191762	0.532885	0	0
Igfbp2	0.270508	5.49162	2.82951	0.0925467	0.376481	0	0
Polr2c	0.270452	4.89709	3.02267	0.0821083	0.356261	0	0
Plscr3	0.270158	3.10416	1.138	0.286076	0.63518	0	0
Ngef	0.270111	6.23358	5.14524	0.0233102	0.181003	0	0
Dll1	0.270058	3.32024	1.23933	0.265599	0.61462	0	0
Praf2	0.269922	4.76972	2.80551	0.0939409	0.37981	0	0
Chga	0.269883	6.50928	4.66998	0.0306944	0.209105	0	0
Mpzl1	0.269818	3.86758	1.64314	0.199895	0.54153	ts_m218	bc5_chi_m218
Rnd1	0.269751	4.57552	2.53463	0.111373	0.412196	0	0
Dnm3	0.269732	6.42623	4.95956	0.0259468	0.191409	0	0
Fto	0.269665	6.43798	6.24714	0.0124394	0.124962	0	0
Ppp1r8	0.269658	5.33336	3.45436	0.063085	0.310186	0	0
Prss12	0.269587	3.86867	1.70608	0.191494	0.532523	0	0
Klhl26	0.269547	5.66128	4.37863	0.0363922	0.230878	0	0
Flii	0.269478	5.74292	4.55301	0.0328609	0.216897	0	0
Cnpy3	0.269201	5.92939	4.87818	0.0271983	0.196539	0	0
Prdm5	0.269033	4.25051	1.90556	0.167457	0.501941	0	0
Hdac9	0.268816	5.02957	3.25605	0.0711606	0.331578	0	0
Lrp1	0.268813	9.20535	14.605	0.000132559	0.00533017	0	0
Itih5	0.268313	4.99427	3.2232	0.0726014	0.334948	0	0
Larp6	0.268203	5.16017	3.34108	0.0675702	0.322319	0	0
Zmiz1	0.268182	5.28173	3.50115	0.0613264	0.306186	ts_m218	0
Fbxo8	0.267962	4.31512	2.08379	0.14887	0.476763	ts_m218	0
Prkcsh	0.267597	5.87147	4.90003	0.0268563	0.194913	0	0
Slc35e1	0.267374	6.27672	6.00834	0.0142384	0.136593	0	0
Errfi1	0.267072	5.53616	3.58329	0.0583634	0.298811	0	0
Abcb9	0.266999	5.20555	3.49777	0.0614515	0.306433	0	0
Klhdc3	0.266847	5.99518	4.96565	0.0258557	0.190958	0	0
Notch1	0.266835	5.79651	4.62825	0.0314495	0.212349	0	0
Myo10	0.266628	5.15391	2.89093	0.0890797	0.370393	0	0
Tns3	0.266555	5.939	3.98874	0.0458053	0.262133	0	0
Dab2ip	0.266301	6.86102	6.49961	0.0107898	0.114511	0	0
Eogt	0.265987	4.24961	2.16368	0.141306	0.466871	0	0
Uqcc2	0.265962	6.08859	4.94007	0.026241	0.192605	0	0
Sympk	0.265834	6.92622	5.30276	0.0212916	0.173048	0	0
Spns1	0.265778	6.29579	5.30931	0.0212118	0.172775	0	0
Rpl18	0.265668	6.55095	6.21491	0.0126678	0.126596	0	0
Smyd5	0.265445	4.92495	2.73134	0.0983966	0.387703	0	0
Crtc3	0.265434	3.72008	1.45358	0.227954	0.574094	ts_m218	0
Tmem110	0.265385	4.31652	2.00264	0.157025	0.486682	0	0
Pop1	0.264933	3.31187	1.18383	0.276578	0.624029	0	0
Por	0.264547	5.75479	4.2303	0.0397084	0.242471	0	0
Pcnx3	0.264467	5.91206	3.71973	0.0537729	0.28484	0	0
Nhsl1	0.264435	5.97755	4.81186	0.0282645	0.200516	0	0
Orc6	0.264291	4.33584	2.23956	0.13452	0.454623	0	0
Drg2	0.263766	5.76653	3.20257	0.0735226	0.336933	0	0
Wls	0.263719	4.68407	1.97722	0.159683	0.490747	0	0
Adck2	0.263451	3.86065	1.63116	0.201543	0.541897	0	0
Kcnip1	0.263437	4.42892	2.23024	0.135333	0.455787	0	0
Xndc1	0.263425	2.49581	0.675405	0.411173	0.741192	0	0
Mcoln1	0.263339	4.7739	2.65945	0.102936	0.396744	0	0
mt-Nd1	0.263298	8.46877	8.41965	0.00371188	0.0599607	0	0
U2af1	0.263239	3.65386	1.43372	0.231159	0.576947	0	0
Jrk	0.263238	4.76965	2.55667	0.10983	0.409475	0	0
Zfp326	0.263132	3.68752	1.52397	0.217019	0.561592	0	0
Frem2	0.263076	3.86524	1.57641	0.209279	0.553182	0	0
Ccdc92	0.262803	4.23857	1.88024	0.170307	0.505706	0	0
Wrap53	0.262639	3.33575	1.14299	0.285021	0.634216	0	0
Cmtm5	0.262551	5.39472	2.98847	0.0838596	0.360108	0	0
Matn4	0.262512	4.18936	1.06012	0.303188	0.649867	0	0
Faim2	0.262397	6.52102	3.36992	0.066397	0.318547	0	0
Rasip1	0.262323	3.4762	1.27516	0.258802	0.607138	0	0
Tpd52l2	0.26214	6.10864	4.6485	0.0310807	0.210724	ts_m218	0
Rps6kc1	0.261774	6.45536	4.93567	0.0263078	0.192731	0	0
Git2	0.261612	5.05914	2.72825	0.0985874	0.388061	0	0
Ramp2	0.261599	4.12835	1.7723	0.183098	0.521427	0	0
L3mbtl2	0.261473	5.38218	3.59216	0.0580526	0.298233	0	0
Rpl27	0.26137	5.85264	2.99685	0.0834267	0.359043	0	0
Cxx1b	0.261243	4.00993	1.7088	0.191141	0.532074	0	0
Ccdc71	0.26089	4.53417	2.45849	0.116891	0.422171	0	0
Derl2	0.260526	5.01521	2.39531	0.121699	0.432079	ts_m218	0
Trappc3	0.260504	5.81348	4.38458	0.0362655	0.230498	0	0
Zbtb48	0.260496	2.75385	0.825675	0.363526	0.702293	0	0
Apeh	0.260331	4.5072	2.17879	0.139925	0.464147	0	0
Fam118a	0.260139	4.85558	2.69644	0.100572	0.392563	0	0
Ptchd4	0.259863	3.79704	1.50418	0.220029	0.565401	ts_m218	0
Tmco3	0.259819	5.79572	4.17843	0.0409416	0.24694	0	0
Myo9b	0.259752	5.69192	4.28331	0.0384884	0.237508	0	0
C87436	0.259715	3.78217	1.52647	0.216643	0.561366	0	0
Bcl9	0.259625	4.53095	2.02561	0.154667	0.483521	ts_m218	0
Elmod3	0.259514	4.11345	1.84897	0.173904	0.510763	0	0
Cdkn2aipnl	0.259449	4.67066	2.60641	0.106432	0.404347	0	0
Mrps12	0.25944	5.11753	3.22558	0.0724961	0.334728	0	0
Adnp2	0.259385	4.66831	2.45983	0.116791	0.422138	0	0
Mettl1	0.25936	3.52706	1.19062	0.275205	0.622618	0	0
Tenm2	0.259312	7.23139	3.3371	0.0677339	0.322836	0	0
Cfap74	0.259292	2.92922	0.842635	0.358644	0.697261	0	0
Ppm1h	0.259276	6.91064	6.8687	0.00877185	0.100662	0	0
Eif3g	0.259185	5.38976	3.39174	0.0655239	0.316835	0	0
Oxa1l	0.259154	4.79254	2.59146	0.107442	0.406169	0	0
Rit2	0.259018	4.80108	2.64213	0.104064	0.399581	0	0
Ndufaf3	0.258601	4.58711	1.75234	0.185583	0.525553	0	0
Gcat	0.258535	3.19135	0.966636	0.325521	0.670413	0	0
Wbp1l	0.258399	5.12201	3.04291	0.0810905	0.353699	ts_m218	0
Hmgcl	0.258178	4.46463	2.11484	0.145877	0.472865	0	0
Pou6f1	0.258153	5.86439	3.83445	0.0502095	0.274927	0	0
Tril	0.257908	5.28271	2.92984	0.0869561	0.366921	0	0
Acsbg1	0.257849	7.67018	7.44861	0.00634855	0.083557	0	0
Phlpp1	0.257664	6.23675	3.49917	0.0613994	0.306419	0	0
Bloc1s2	0.257361	2.74846	0.788298	0.374615	0.711826	0	0
Plppr2	0.257359	6.8081	4.82423	0.0280625	0.199934	0	0
Mrpl12	0.257355	4.4697	2.21949	0.136278	0.456991	0	0
Adcy6	0.256978	5.13642	3.12188	0.0772474	0.34479	0	0
Gm26397	0.256912	3.32365	0.875996	0.349301	0.689555	0	0
Ppt2	0.25685	2.95734	0.907007	0.34091	0.681389	0	0
Furin	0.256732	4.6189	2.10629	0.146694	0.474587	0	0
Nrxn2	0.256704	7.48549	8.87912	0.00288451	0.0504768	0	0
Mapk8ip1	0.256569	7.82626	5.0224	0.0250215	0.187159	0	0
Irf2bpl	0.256464	5.6684	4.12508	0.042252	0.250654	0	0
Rfx1	0.256373	3.54725	1.17424	0.278531	0.626883	0	0
Wdr5b	0.25632	2.89045	0.828969	0.362571	0.701197	0	0
Rdh13	0.256259	4.98127	1.90218	0.167834	0.502512	0	0
Rpain	0.256258	3.63202	1.32401	0.249873	0.598259	0	0
Dhps	0.256195	4.82322	2.57029	0.108888	0.409131	0	0
Hpcal4	0.256038	9.13387	14.6039	0.00013264	0.00533017	0	0
Ctif	0.255924	5.16732	3.14072	0.0763599	0.342665	0	0
Caln1	0.25592	7.46699	4.96958	0.0257969	0.190798	ts_m218	0
Krt73	0.255708	3.12993	0.914061	0.339039	0.680027	0	0
Ptk7	0.25555	4.44782	2.08129	0.149114	0.476763	0	0
Sdr42e1	0.255379	2.59615	0.673337	0.411891	0.741628	0	0
Psmb1	0.255152	7.00013	7.16475	0.007435	0.0913365	0	0
Papd4	0.255028	2.96344	0.979663	0.322282	0.668276	0	0
Kctd9	0.255006	2.71372	0.711235	0.399034	0.731506	ts_m218	0
Atp13a4	0.254836	3.10549	1.02251	0.311925	0.658856	0	0
Nme7	0.254686	4.37635	2.09248	0.148025	0.476122	0	0
Smarcd1	0.25423	5.36056	2.99559	0.0834915	0.359056	0	0
Slc35a4	0.253863	4.54809	2.10353	0.146959	0.474587	0	0
Stk3	0.253759	3.906	1.59632	0.206425	0.549039	0	0
Cox4i1	0.253669	8.88182	12.7423	0.00035748	0.0115493	0	0
Slc9a2	0.253533	4.69353	2.52938	0.111744	0.413116	0	0
Pcbp1	0.253221	4.9496	2.77345	0.0958392	0.382668	0	0
Flrt1	0.252825	4.02147	1.40287	0.236243	0.582029	0	0
Pcbp3	0.252788	4.51695	1.95734	0.161798	0.493994	0	0
Atf6b	0.252785	5.27574	3.28783	0.0697954	0.328239	0	0
Tppp3	0.252672	4.06919	1.37744	0.240538	0.586721	0	0
C330006A16Rik	0.252651	4.79733	2.1717	0.14057	0.465099	0	0
Rprml	0.252603	5.96424	3.75589	0.0526218	0.281763	0	0
Trim8	0.252345	5.74202	3.67621	0.0551941	0.288668	0	0
Nubp2	0.252314	3.83658	1.37522	0.240917	0.587154	0	0
Fbxo31	0.252245	6.82911	4.8361	0.0278699	0.199221	0	0
Slc6a9	0.252157	3.68407	1.20461	0.272402	0.62027	0	0
Igdcc4	0.252022	5.19006	3.17973	0.0745573	0.339316	0	0
Sdpr	0.251961	2.76103	0.737652	0.390414	0.724371	0	0
Vegfb	0.251944	2.76799	0.740525	0.389493	0.723468	0	0
3110040N11Rik	0.251696	3.19784	1.02394	0.311587	0.658856	0	0
Efnb2	0.251477	3.79338	1.19175	0.274976	0.622597	ts_m218	0
Rnf40	0.251289	6.19072	4.50311	0.0338332	0.220815	0	0
Lta4h	0.251211	4.76348	2.46496	0.116411	0.421644	0	0
Dcp1b	0.251148	3.57222	1.19698	0.273926	0.621945	0	0
Rps19bp1	0.251083	3.33966	1.06567	0.301927	0.649045	0	0
Cops4	0.251036	6.41362	5.5811	0.0181553	0.155581	0	0
Npy5r	0.251	2.35238	0.551152	0.457847	0.771844	0	0
Grip1	0.250983	5.12924	2.67101	0.102191	0.395719	ts_m218	0
Higd2a	0.250947	5.12218	3.05207	0.0806343	0.353283	0	0
Jade2	0.25091	4.32046	1.83924	0.17504	0.511704	ts_m218	0
Isca1	0.250492	4.31868	1.78259	0.181832	0.520036	0	0
Ppp6r2	0.25001	7.17107	7.30498	0.00687639	0.0876451	0	0
Map7d1	0.249936	6.5716	4.66818	0.0307265	0.209184	0	0
Rmdn3	0.249894	5.61752	3.34906	0.0672435	0.321287	0	0
Zfp235	0.249843	4.76581	2.439	0.118352	0.425819	0	0
Tor1aip1	0.249774	3.64741	1.2779	0.258289	0.60661	0	0
Hspa12b	0.249759	2.44727	0.557061	0.455447	0.771112	0	0
Tmem28	0.249576	4.59632	1.94286	0.163358	0.495665	0	0
Slc38a6	0.249521	2.56211	0.679019	0.409925	0.740317	0	0
Col4a5	0.249504	4.72197	2.09904	0.147392	0.475265	0	0
Flywch1	0.24939	6.68669	5.42692	0.0198287	0.165187	0	0
Cntn4	0.249367	4.30672	1.66696	0.196666	0.53843	0	0
Rnf138	0.249337	3.96342	1.51443	0.218464	0.563205	0	0
Ubl5	0.249264	5.65248	3.49435	0.0615787	0.30648	0	0
Ccdc57	0.249255	3.04857	0.866269	0.35199	0.691659	0	0
Snd1	0.249031	7.39571	3.9921	0.045714	0.261739	0	0
Htra1	0.24888	7.77101	3.75574	0.0526266	0.281763	0	0
Wrb	0.248774	6.54075	5.63599	0.0175954	0.152689	0	0
Tinf2	0.248695	3.29105	1.06311	0.302507	0.649045	0	0
Spout1	0.248682	4.35054	1.71093	0.190864	0.531568	0	0
Ccdc157	0.248611	4.62091	1.99595	0.157721	0.487351	0	0
Smo	0.248423	4.52447	2.13909	0.143587	0.469392	0	0
Fam102a	0.248414	5.97114	4.3477	0.0370589	0.232928	0	0
Abhd2	0.248407	7.32105	4.64574	0.0311307	0.210724	ts_m218	0
Atp6v0a1	0.248362	8.32666	10.9256	0.000948429	0.0240468	0	0
Mcts1	0.248289	4.80627	2.42186	0.119653	0.428433	0	0
Slc9a8	0.24827	4.88986	1.9778	0.159623	0.49069	0	0
Slc30a7	0.248155	4.68183	2.07994	0.149246	0.476763	0	0
Xylt1	0.248097	5.68804	3.65579	0.0558748	0.290855	0	0
Raly	0.248062	5.57158	3.32445	0.0682566	0.324136	0	0
Ndufaf8	0.248032	3.01677	0.85694	0.354596	0.694247	0	0
Rab1b	0.247649	7.3956	7.62221	0.00576539	0.0789223	0	0
Mxra7	0.247549	2.55674	0.660062	0.416538	0.74441	0	0
Mapkbp1	0.247509	6.14329	4.77287	0.0289116	0.202885	0	0
mt-Nd4	0.247438	6.84974	3.22945	0.072325	0.334467	0	0
Mettl23	0.247408	4.34382	1.85424	0.173291	0.509862	0	0
Dtymk	0.247345	4.71599	2.32432	0.127366	0.441315	0	0
Il10ra	0.24711	2.83289	0.726418	0.394047	0.727666	0	0
Syt12	0.247031	4.9142	2.54683	0.110516	0.410886	0	0
Hmgn3	0.246883	4.52912	1.98289	0.159087	0.489923	0	0
Sf3b6	0.246821	5.22164	3.13658	0.0765542	0.343018	0	0
Tnip1	0.246754	3.40345	1.08113	0.298444	0.646694	0	0
A730017L22Rik	0.246679	2.8221	0.759067	0.383621	0.719075	0	0
Ablim2	0.246636	5.92936	4.23386	0.0396252	0.242216	0	0
Tmem261	0.246134	4.03082	1.64521	0.199613	0.54153	0	0
Lgmn	0.246088	6.77706	5.80216	0.0160065	0.145053	0	0
Col18a1	0.245987	3.70886	1.22346	0.268684	0.616636	0	0
Tgfb2	0.245784	4.62022	1.93308	0.164422	0.497574	0	0
Sharpin	0.245543	4.87443	2.37129	0.123585	0.4357	0	0
Srp14	0.245392	6.42381	5.17493	0.0229151	0.179696	0	0
Rhbdd3	0.245315	3.72913	1.34117	0.246828	0.595892	0	0
Slc22a17	0.245309	8.37101	10.9591	0.00093143	0.0238712	0	0
Lasp1	0.245168	6.22327	4.15427	0.0415297	0.247882	ts_m218	0
Agpat1	0.245154	6.6984	4.08692	0.0432164	0.254389	0	0
Nfe2l1	0.244797	7.09811	7.16509	0.0074336	0.0913365	ts_m218	bc5_chi_m218
Kdelr1	0.244762	5.76903	2.70801	0.0998452	0.390901	0	0
Trank1	0.244695	8.32385	4.55879	0.0327502	0.216414	0	0
Tram1l1	0.244582	4.09511	1.64266	0.199961	0.54153	0	0
Atp5o	0.244433	7.25731	4.95095	0.0260764	0.192057	0	0
Mlip	0.244309	4.54151	2.02408	0.154823	0.483521	0	0
Ccdc130	0.244247	3.34447	1.05844	0.303571	0.650239	0	0
Baz2a	0.24421	5.34029	2.55629	0.109856	0.409475	0	0
Atad3a	0.244184	5.70779	3.9464	0.0469717	0.265809	0	0
Aplp1	0.244171	9.44421	8.92898	0.00280681	0.0497505	0	0
Minos1	0.244033	4.44572	1.96326	0.161166	0.492794	0	0
Mief2	0.244016	4.87398	2.56216	0.109449	0.409337	0	0
Pqbp1	0.24391	5.5174	2.97207	0.0847134	0.361248	0	0
Kctd10	0.243892	4.26565	1.79057	0.180857	0.519156	0	0
Gprasp2	0.243696	6.78526	5.00497	0.0252746	0.188236	0	0
Unc93b1	0.243608	3.50774	1.02279	0.311859	0.658856	ts_m218	0
Sfxn5	0.243486	7.83853	8.2272	0.00412672	0.0640878	ts_m218	0
Tcerg1	0.243415	5.04477	1.99666	0.157647	0.487314	0	0
Dcun1d3	0.243335	4.17998	1.66168	0.197377	0.539403	0	0
Nsun5	0.243331	3.27705	0.969792	0.324732	0.669546	0	0
Spin2c	0.243326	2.37643	0.530239	0.466506	0.777768	0	0
Tspan15	0.243296	4.93511	1.79558	0.180247	0.518044	0	0
Sox12	0.243279	3.48885	1.08311	0.298003	0.646265	0	0
Aldoa	0.243269	10.0649	13.2723	0.000269353	0.00929429	0	0
Zfyve26	0.243248	5.1798	2.89657	0.0887682	0.370393	ts_m218	0
Fnbp1	0.243217	4.49837	2.08878	0.148385	0.476763	0	0
Olfm2	0.243203	5.52981	3.16984	0.07501	0.339729	0	0
Cuedc2	0.243183	6.37658	4.84932	0.0276571	0.198336	0	0
Atf7	0.243037	3.86236	1.32923	0.248943	0.59774	0	0
Tubg2	0.242908	3.66287	1.22038	0.269287	0.617032	0	0
Btbd11	0.242797	4.08586	1.54082	0.214496	0.558657	0	0
Syp	0.242758	9.748	10.3451	0.00129818	0.0298634	0	0
Hibch	0.24271	2.97941	0.763669	0.382183	0.717856	0	0
Nup107	0.242661	4.17387	1.52677	0.216598	0.561366	0	0
Rbm33	0.24249	5.81515	3.89903	0.0483139	0.270565	0	0
Plxnc1	0.242379	5.58339	1.95991	0.161523	0.493282	ts_m218	0
Eral1	0.242256	4.26945	1.68556	0.194187	0.535549	0	0
Rrp9	0.242194	4.6051	2.147	0.142848	0.468062	0	0
Bcl2l1	0.242159	6.99946	6.23008	0.0125598	0.125846	0	0
Reep2	0.242014	6.0986	4.57931	0.0323603	0.21546	0	0
Tspan31	0.241878	5.10965	2.67867	0.101701	0.39472	0	0
Tpi1	0.241604	8.78318	6.7446	0.0094032	0.104888	0	0
Fbxo6	0.241485	4.01984	1.4121	0.234709	0.580574	0	0
Mrpl20	0.241316	5.80407	2.94969	0.0858939	0.363491	0	0
Unc5d	0.241151	5.00438	1.6828	0.194552	0.535915	0	0
Ppfia3	0.241145	7.50695	3.91874	0.0477506	0.268781	0	0
Arrb1	0.240903	8.15232	9.14097	0.00249949	0.0455493	ts_m218	0
Rpl28	0.240803	4.53586	1.64473	0.199678	0.54153	0	0
Tspan33	0.240801	3.86363	1.31547	0.251406	0.599744	0	0
Ppp1r14b	0.240692	3.49046	1.07174	0.300553	0.648864	0	0
Fars2	0.24067	5.14528	2.35237	0.125093	0.437861	0	0
Hdac6	0.240571	5.97061	3.98451	0.0459205	0.262534	0	0
Znhit1	0.240546	4.09418	1.55024	0.2131	0.556762	0	0
Rps5	0.240354	7.93654	5.23347	0.0221562	0.176957	0	0
Rnf44	0.240268	4.89982	2.40325	0.121083	0.431204	0	0
Dedd2	0.240252	4.81846	2.36173	0.124344	0.436596	0	0
Ercc4	0.240232	3.71363	1.20556	0.272213	0.620204	0	0
Alg12	0.239941	3.60783	1.18501	0.276338	0.623937	0	0
Clasrp	0.239937	4.14303	1.63638	0.200822	0.541735	0	0
Cdk11b	0.23992	4.17274	1.47767	0.22414	0.569985	0	0
Camsap3	0.239875	4.56226	2.02746	0.154478	0.483521	0	0
Psmb3	0.239801	5.66692	3.17173	0.0749232	0.339729	0	0
Parvg	0.239664	3.25221	0.88538	0.346732	0.687454	0	0
Tusc2	0.239611	5.71086	3.15868	0.0755242	0.34075	0	0
Emc1	0.239491	7.10712	6.57679	0.0103317	0.110956	0	0
Wee1	0.239489	2.86772	0.704804	0.401174	0.733061	0	0
Rplp2	0.239405	6.7109	5.52098	0.0187897	0.159162	0	0
Eif3b	0.239394	5.54001	3.24477	0.0716517	0.332276	0	0
Gpr107	0.239379	6.27555	4.57309	0.0324779	0.21546	0	0
Aff2	0.239116	3.30461	0.914035	0.339046	0.680027	0	0
Mppe1	0.239079	2.96253	0.66747	0.413935	0.742613	0	0
Foxj2	0.239066	4.52852	1.80711	0.178856	0.516087	0	0
Dcun1d2	0.239016	5.1467	2.56546	0.109221	0.409337	0	0
Plbd2	0.239007	5.29975	2.93895	0.086467	0.364996	0	0
Tcp11l1	0.238771	4.86023	1.65448	0.198351	0.540685	0	0
Gorasp1	0.23837	4.33269	1.70643	0.19145	0.532523	0	0
D430042O09Rik	0.238359	5.45905	2.88767	0.0892599	0.370393	0	0
Nfkbib	0.238359	2.84907	0.670387	0.412917	0.742014	0	0
Zfp646	0.238272	5.49105	3.25354	0.0712694	0.331578	0	0
Mtm1	0.238208	2.59898	0.637343	0.424674	0.750555	0	0
Plekhm1	0.238103	3.78234	1.2342	0.266592	0.615817	0	0
Btd	0.238096	3.22445	0.914378	0.338955	0.680027	0	0
Eed	0.237766	3.08497	0.819904	0.365208	0.703921	0	0
Ccdc167	0.237687	2.68868	0.621385	0.430533	0.754856	0	0
Rnf41	0.237667	6.57923	3.17698	0.0746827	0.339316	ts_m218	0
Kcnh1	0.237519	5.80854	2.98595	0.0839899	0.360109	ts_m218	0
Ndufa3	0.237412	5.73573	3.56014	0.0591829	0.300239	0	0
Tns2	0.237186	2.68211	0.560823	0.453929	0.770048	0	0
Rnf169	0.237148	5.62311	3.56732	0.0589273	0.299725	0	0
Mdh1	0.237117	9.36963	13.1516	0.000287272	0.0097418	0	0
Srprb	0.236937	4.77543	2.18233	0.139603	0.463738	0	0
Dpm1	0.236906	3.25821	0.934303	0.333747	0.677073	0	0
Zfp64	0.236851	4.08961	1.49215	0.221884	0.567882	0	0
Twf1	0.236793	4.58641	2.01584	0.155665	0.484101	0	0
Zfp609	0.236714	4.07606	1.46859	0.225569	0.571304	ts_m218	0
Zfas1	0.236661	4.16591	1.26071	0.261517	0.610992	0	0
Lrrc4b	0.236611	7.39929	4.20624	0.0402754	0.244525	0	0
Rell2	0.236546	5.08502	2.11903	0.145479	0.472496	0	0
Stx4a	0.236371	3.04154	0.753111	0.385493	0.720436	0	0
Faap100	0.236337	5.09913	2.20757	0.137335	0.45882	0	0
Caskin2	0.236336	4.45275	1.70111	0.192143	0.533291	0	0
Abhd4	0.236277	5.92044	3.58373	0.0583481	0.298811	0	0
Ttpal	0.236129	6.31558	4.15576	0.0414932	0.247867	0	0
Trim56	0.235912	2.7084	0.636211	0.425086	0.750555	0	0
Scamp3	0.23589	3.69564	1.09145	0.29615	0.643922	0	0
Gm24616	0.235793	4.0679	1.23604	0.266236	0.61549	0	0
Dact3	0.235742	6.92928	5.61817	0.0177752	0.153678	0	0
Ift46	0.235708	5.36743	2.84944	0.0914055	0.37432	0	0
Gpatch1	0.235301	3.93469	1.38435	0.239362	0.585379	0	0
Plin3	0.235239	3.88154	1.12799	0.288203	0.636372	0	0
Mvb12b	0.23518	6.89187	4.78929	0.0286372	0.201567	ts_m218	0
Bex3	0.2351	5.91421	3.88441	0.0487363	0.271318	0	0
Nrg2	0.235074	2.63179	0.599542	0.438753	0.76024	0	0
Ndufb9	0.234997	7.5887	4.57248	0.0324895	0.21546	0	0
Ubqln4	0.23484	6.58774	5.01118	0.0251841	0.187802	0	0
Fam195b	0.234692	5.01511	2.0346	0.153754	0.482749	0	0
Tmem25	0.234573	4.77575	2.08342	0.148906	0.476763	ts_m218	0
Plekhb2	0.23434	7.50178	5.6711	0.0172466	0.151169	0	0
Syt5	0.234231	6.38546	4.54267	0.03306	0.217841	0	0
Igsf8	0.234062	7.26617	4.32113	0.037642	0.235021	0	0
Poglut1	0.233829	5.15484	2.61269	0.106012	0.403929	0	0
Ly6h	0.233782	7.19223	4.67716	0.0305662	0.208476	0	0
Zfp868	0.23377	3.51498	1.03348	0.309344	0.656574	0	0
Tle2	0.233716	2.48278	0.499256	0.479827	0.786256	0	0
Phf12	0.233661	4.75875	2.20021	0.137992	0.459961	0	0
Det1	0.233546	2.46102	0.498879	0.479993	0.786256	0	0
Smad3	0.233418	5.43816	2.54799	0.110435	0.410715	0	0
Npffr1	0.233293	2.70315	0.616387	0.432393	0.75622	0	0
Ankrd11	0.23325	6.71942	5.02106	0.0250408	0.187159	0	0
Pacsin3	0.233207	3.84256	1.21715	0.26992	0.617555	0	0
Yeats4	0.233146	4.63173	1.97821	0.15958	0.490687	ts_m218	0
Zswim7	0.233029	2.73756	0.637603	0.42458	0.750555	0	0
Schip1	0.232919	4.64105	1.90862	0.167117	0.501325	0	0
Wdr70	0.232833	3.5831	1.01192	0.314443	0.661242	0	0
Dhrs3	0.232723	3.8122	1.27505	0.258821	0.607138	0	0
Commd6	0.232717	4.24958	1.57305	0.209764	0.55361	0	0
Gnpat	0.232677	5.85591	3.4479	0.0633324	0.31114	0	0
Tmem59	0.23243	6.16427	3.21635	0.0729062	0.335956	0	0
Zbtb8b	0.23226	2.57235	0.525139	0.468658	0.77867	0	0
Papd7	0.232209	5.17664	1.87035	0.171435	0.506985	0	0
Hecw2	0.232174	5.5224	3.03318	0.081578	0.355185	0	0
Osbpl10	0.232081	3.5311	0.951108	0.329437	0.674312	0	0
Slc46a1	0.232024	4.2611	1.64322	0.199884	0.54153	0	0
Ccs	0.231948	3.70374	1.14956	0.28364	0.632403	0	0
Rps8	0.231826	6.97351	4.52287	0.0334447	0.21914	0	0
Atr	0.231635	4.26516	1.63959	0.200381	0.541735	0	0
Zwint	0.231337	9.10926	5.03971	0.0247727	0.187159	0	0
Nipal4	0.231103	3.2678	0.858548	0.354145	0.693951	0	0
Lamb2	0.231083	5.63553	3.08958	0.0787953	0.34863	0	0
St3gal5	0.231	4.51929	1.82817	0.176344	0.513532	0	0
Zfp827	0.230923	5.62418	3.00276	0.0831227	0.358578	0	0
Fbxo44	0.23078	6.20927	3.45669	0.0629962	0.31007	0	0
Kars	0.230601	5.98951	3.80318	0.0511554	0.277629	0	0
Mdm1	0.230596	2.92418	0.660276	0.416463	0.74441	0	0
Hdac10	0.230308	4.10882	1.44289	0.229672	0.575147	0	0
Mrpl54	0.230287	4.14867	1.41946	0.233493	0.57904	0	0
Elp3	0.230236	6.26017	3.15897	0.0755107	0.34075	0	0
Rims4	0.230202	6.14074	4.0913	0.0431044	0.254031	ts_m218	0
Vkorc1l1	0.230157	5.30239	2.78918	0.0949026	0.381228	0	0
Slc7a4	0.230069	6.37003	4.69512	0.0302484	0.2074	0	0
Fam57b	0.229849	3.74388	1.16463	0.280507	0.628781	0	0
Fau	0.229671	6.1762	4.09757	0.0429449	0.253218	0	0
Glt1d1	0.22958	4.47843	1.73078	0.188312	0.52846	0	0
Chchd7	0.229308	3.56871	1.00181	0.316874	0.663893	0	0
Wdtc1	0.229277	6.2476	3.57433	0.058679	0.299351	0	0
Invs	0.22918	3.49423	0.901792	0.342302	0.682672	0	0
Slc22a4	0.229174	2.60528	0.545918	0.45999	0.773734	0	0
Twf2	0.229025	5.51167	3.06819	0.0798384	0.351645	0	0
Rela	0.22896	3.72019	1.13113	0.287535	0.635979	0	0
Tmem132d	0.228948	4.77312	1.69949	0.192355	0.533291	0	0
Fam20b	0.228578	6.69387	4.36462	0.0366926	0.232025	ts_m218	0
Nid2	0.228453	3.31921	0.953073	0.328938	0.67418	0	0
Cyp1b1	0.228299	2.64692	0.549553	0.4585	0.772341	0	0
Arntl	0.228188	4.75449	1.73676	0.18755	0.527886	0	0
Lncpint	0.228136	3.51499	0.957635	0.327784	0.672816	0	0
Rxra	0.228009	4.78477	1.66984	0.19628	0.53826	0	0
Erf	0.227953	4.84507	1.63727	0.200701	0.541735	0	0
Gale	0.227867	3.81777	1.14275	0.285073	0.634216	0	0
Abcc9	0.227843	3.39327	0.913564	0.339171	0.680027	0	0
Stard3	0.227785	4.75436	1.82104	0.17719	0.514455	0	0
Ece1	0.22768	5.13881	2.44977	0.117542	0.423458	0	0
Mtpap	0.227637	4.42856	1.66089	0.197484	0.539403	0	0
N4bp1	0.227624	5.14009	2.47342	0.115785	0.420949	0	0
Ftx	0.227588	3.83659	1.19199	0.274928	0.622597	0	0
Eml2	0.22743	6.95224	3.69695	0.0545122	0.286427	0	0
5330434G04Rik	0.227379	4.58763	1.81274	0.17818	0.515116	0	0
Gm2a	0.226816	6.16888	3.86526	0.0492956	0.272506	0	0
BC022687	0.226672	3.00948	0.720154	0.396093	0.729521	0	0
Slco1a4	0.22664	5.0506	2.05456	0.151751	0.48116	0	0
B3gat1	0.226398	7.21509	6.44865	0.0111036	0.116513	ts_m218	0
Otud7a	0.2262	5.81373	2.46362	0.11651	0.421644	0	0
Sec24c	0.226128	5.99094	3.08253	0.0791372	0.349642	0	0
Sgsm2	0.22612	6.22022	3.16166	0.0753863	0.340523	0	0
Tmem35a	0.226081	6.1776	3.41149	0.0647439	0.315136	0	0
Maea	0.226053	6.28777	3.52488	0.0604543	0.304175	0	0
Hexim2	0.225963	3.37801	0.927684	0.335466	0.677805	0	0
Diexf	0.225862	4.14562	1.4228	0.232944	0.578416	0	0
Ndufs2	0.225844	7.93119	3.89719	0.0483669	0.270565	0	0
Pex10	0.225772	3.81125	1.16917	0.279572	0.628497	0	0
Phka1	0.225461	5.01973	2.17379	0.14038	0.464865	0	0
Lcp1	0.225322	2.94037	0.641142	0.423297	0.749695	0	0
Sorcs2	0.225245	6.5031	4.06968	0.0436597	0.255367	0	0
Miga2	0.225231	6.6831	5.02442	0.0249922	0.187159	0	0
Cdc42se2	0.225078	8.24715	7.88309	0.00498993	0.0722284	ts_m218	0
Rpl18a	0.225061	5.69176	3.14494	0.0761627	0.342175	0	0
Stub1	0.225039	5.44351	2.71534	0.0993875	0.389932	0	0
Ankrd24	0.225004	3.91494	1.17492	0.278392	0.626883	0	0
Gm26448	0.224834	6.96096	3.21197	0.0731015	0.336457	0	0
1110032A03Rik	0.224735	3.95601	1.10229	0.293764	0.641726	0	0
Tuba1b	0.224632	6.28746	3.02781	0.0818485	0.355973	0	0
Cnot3	0.224584	4.03529	1.21176	0.270984	0.618873	0	0
Pkdcc	0.224515	3.67934	1.10402	0.293386	0.641501	0	0
Scap	0.224345	6.65636	3.17911	0.0745854	0.339316	0	0
Abcg2	0.224259	4.28985	1.49532	0.221393	0.567673	0	0
Ep400	0.224091	6.67664	2.87544	0.0899405	0.371977	0	0
Matn2	0.224031	6.00044	3.46263	0.0627705	0.309439	0	0
Rab11fip5	0.223975	6.29012	3.01667	0.0824123	0.357314	0	0
Slc41a2	0.223796	5.17418	2.38288	0.122671	0.434338	0	0
Atic	0.223738	4.95965	2.04938	0.152268	0.481275	0	0
Mettl21a	0.223482	3.69075	1.01289	0.314212	0.661139	ts_m218	0
Aifm1	0.223447	3.47594	0.938146	0.332755	0.676591	0	0
Fbln2	0.223295	3.62218	1.08697	0.297144	0.645242	0	0
Gla	0.223213	3.97975	1.22828	0.267741	0.616482	0	0
Cdh20	0.222825	3.42085	0.898467	0.343193	0.683571	0	0
Slc4a3	0.222745	7.26645	3.53434	0.0601101	0.303407	0	0
Dmwd	0.222635	5.94655	3.3038	0.0691198	0.326242	0	0
Kitl	0.222506	4.06725	1.3011	0.254012	0.602386	0	0
Ing1	0.222343	3.62137	0.995874	0.318311	0.665197	0	0
Rab26	0.222232	4.03696	1.13605	0.286488	0.635316	0	0
Pdzd2	0.222178	5.782	2.71935	0.0991382	0.389337	0	0
Rprd1b	0.222173	5.09603	2.13504	0.143967	0.469992	0	0
Aup1	0.221772	4.83624	1.9141	0.166509	0.500384	0	0
Ddx49	0.221476	4.60895	1.82471	0.176754	0.513956	0	0
Zc3h10	0.221355	3.61821	1.01148	0.314548	0.661242	0	0
Gpx4	0.2212	7.02513	5.6706	0.0172516	0.151169	0	0
Acot2	0.221189	3.32038	0.79201	0.373493	0.710264	0	0
Trpc4	0.221018	5.67893	2.69457	0.10069	0.392891	0	0
Tmppe	0.221007	3.35495	0.814895	0.366677	0.705228	0	0
Prodh	0.221004	4.92449	1.9443	0.163203	0.495665	0	0
Dtnbp1	0.220888	5.15689	2.05079	0.152127	0.48116	0	0
Grm3	0.220808	5.92563	2.76738	0.0962034	0.383087	0	0
Lypla2	0.220773	5.74505	2.59593	0.107138	0.405304	0	0
Hyou1	0.220575	7.31362	4.6817	0.0304856	0.208276	0	0
Psma2	0.219871	6.32129	4.23164	0.0396772	0.242407	0	0
Cdk10	0.219739	4.78589	1.87936	0.170407	0.505842	0	0
Hmgxb3	0.219677	6.22792	3.89318	0.0484825	0.270565	0	0
Grcc10	0.219436	4.00952	1.21844	0.269667	0.61754	0	0
Rmdn2	0.219386	2.80733	0.569317	0.450531	0.767856	0	0
Pacsin1	0.219378	7.15482	4.05475	0.0440473	0.256809	0	0
Firre	0.219345	5.1241	2.00886	0.156383	0.485336	0	0
Ppm1f	0.219302	6.20079	3.639	0.0564408	0.292564	0	0
Rmnd5b	0.219193	5.84673	3.31855	0.0685024	0.324747	0	0
Hcfc1r1	0.219162	4.33834	1.29997	0.254219	0.602478	0	0
Ndufb11	0.219159	6.38367	4.31265	0.03783	0.23569	0	0
Morn4	0.219105	3.92618	1.16116	0.281226	0.628781	0	0
Adpgk	0.219098	4.37765	1.46386	0.226317	0.571699	0	0
Gdpd2	0.218999	2.35101	0.403648	0.525211	0.811437	0	0
Pex3	0.218955	4.25331	1.23525	0.266389	0.61549	0	0
Chrac1	0.21893	3.16364	0.741005	0.389339	0.723298	0	0
Pcx	0.218784	6.20938	3.30218	0.069188	0.326432	0	0
Crebrf	0.21869	5.54132	2.55797	0.10974	0.409475	0	0
Mttp	0.218636	2.78128	0.573149	0.44901	0.766624	0	0
Tmem138	0.218625	2.78525	0.56892	0.450688	0.767856	0	0
Soga1	0.218619	6.46551	3.56871	0.0588779	0.299631	0	0
Trappc1	0.218553	4.9591	2.15861	0.141773	0.467547	0	0
Ctu2	0.21833	4.18958	1.34166	0.246742	0.595881	0	0
Ino80c	0.218276	3.96297	1.1269	0.288437	0.636405	0	0
Tbc1d31	0.218221	2.4768	0.448387	0.503102	0.802071	0	0
Syngap1	0.218036	7.96931	7.26826	0.00701839	0.0883014	0	0
Mthfd1	0.217966	5.40602	2.54292	0.110789	0.411378	0	0
Sil1	0.217957	4.89466	1.90088	0.16798	0.502605	0	0
Tex264	0.217952	5.99212	2.20326	0.137719	0.459434	0	0
Ipo13	0.217917	5.48191	2.75562	0.0969135	0.384747	0	0
Cx3cr1	0.217881	5.27672	1.89624	0.1685	0.503417	0	0
Pgam1	0.217658	5.86581	2.79116	0.0947856	0.381201	0	0
Mto1	0.217591	4.71587	1.7278	0.188692	0.529274	0	0
Glt8d1	0.21756	3.66908	0.72599	0.394186	0.727666	0	0
Brsk1	0.21747	6.93432	4.81007	0.028294	0.200603	0	0
Ndrg2	0.217054	8.86364	4.83357	0.0279108	0.199221	0	0
Ndufv2	0.217053	6.93969	5.14971	0.0232502	0.180778	0	0
Nelfe	0.21701	3.86012	1.19535	0.274252	0.621945	0	0
Fam161b	0.21701	3.37602	0.827144	0.3631	0.702061	0	0
Cln3	0.216981	3.04798	0.695056	0.40445	0.735015	0	0
Id2	0.216929	5.74769	2.65991	0.102907	0.396744	0	0
N4bp2l1	0.216917	3.69382	0.988329	0.320151	0.666772	0	0
Sik2	0.216821	4.24436	1.3504	0.245207	0.593823	ts_m218	0
Zfp518a	0.216819	3.3084	0.794309	0.3728	0.709792	0	0
Col1a2	0.216815	6.0031	2.45971	0.116801	0.422138	0	0
Ggact	0.216697	3.42342	0.859006	0.354017	0.693816	0	0
Lrrc8a	0.21655	3.74389	1.03073	0.309986	0.657295	0	0
Ppp4c	0.216391	4.87252	1.97288	0.160143	0.490995	0	0
Hgs	0.216137	5.68417	2.54564	0.110599	0.411062	0	0
Cd53	0.216125	3.40169	0.860359	0.353638	0.69354	0	0
Ret	0.215951	2.97308	0.61125	0.434318	0.75737	ts_m218	0
Urb2	0.215696	4.90839	2.07434	0.149795	0.478004	0	0
Eif1	0.215424	5.20738	1.63309	0.201276	0.541897	0	0
Pla2g7	0.215366	6.18755	2.75419	0.0969999	0.384747	0	0
Frmpd1	0.215237	4.20987	1.20154	0.273014	0.620816	0	0
Rnf144a	0.215041	4.84622	1.86762	0.171748	0.506985	0	0
[truncated: 9,116 more rows]

## Sheet: 1C VGluT2 enriched
	logFC	FC	logCPM	CPM	LR	PValue	FDR		Legend
Crym	8.26237	307.058	9.01268	516.518	123.56	1.05159e-28	1.22353e-24		logFC	log2 fold-change (VGluT2+ cells compared to VGAT+ cells)
Slc17a7	6.99397	127.466	5.88309	59.0182	88.1157	6.17347e-21	5.52526e-18		FC	fold-change (VGluT2+ cells compared to VGAT+ cells)
Igfbpl1	6.98268	126.472	6.37132	82.7864	86.411	1.46167e-20	1.21475e-17		logCPM	log2 counts per million
Ezr	11.3162	2549.89	5.24876	38.0219	82.8067	9.04806e-20	5.84857e-17		CPM	counts per million
Mlc1	7.502	181.27	4.9754	31.4591	72.5198	1.65365e-17	7.69611e-15		LR	likelihood ratio
Bhlhe22	5.03447	32.7739	6.23958	75.5613	71.8904	2.27491e-17	1.01802e-14		Pvalue	Unadjusted p-value
Nrgn	6.72911	106.088	5.28184	38.9037	69.6571	7.05636e-17	3.04077e-14		FDR	FDR corrected p-value
Gfap	4.88763	29.6022	6.24807	76.0076	66.012	4.48184e-16	1.53371e-13
Slc17a6	6.10102	68.6421	4.87955	29.4368	62.9407	2.13021e-15	6.52236e-13
Ptk2b	5.79255	55.4283	5.57119	47.5441	61.8909	3.6303e-15	1.08304e-12
Nrn1	10.3014	1261.92	4.21945	18.6287	61.7316	3.93612e-15	1.14492e-12
Pappa2	10.2786	1242.13	4.29512	19.6318	59.8142	1.04247e-14	2.69537e-12
Neurod6	5.39159	41.9789	4.8232	28.3092	57.5169	3.35092e-14	7.64469e-12
Sv2b	4.12786	17.4828	6.29256	78.3878	56.9035	4.57733e-14	9.68312e-12
Inf2	5.60104	48.5378	4.78011	27.4762	54.861	1.2936e-13	2.51518e-11
Itpka	5.89158	59.3666	4.43635	21.6508	52.4448	4.42518e-13	7.68462e-11
Lama2	9.71437	840.073	3.79985	13.9274	51.537	7.02609e-13	1.20219e-10
Ccdc164	6.45842	87.9385	4.26732	19.2571	50.6577	1.09966e-12	1.72899e-10
Crabp1	9.6979	830.537	3.7889	13.8221	50.6242	1.11859e-12	1.73531e-10
Rasal1	9.63037	792.556	3.75951	13.5433	49.6854	1.80486e-12	2.65817e-10
Neurod2	5.75866	54.1413	4.20852	18.4881	49.3052	2.19086e-12	3.10862e-10
Raver2	9.57432	762.355	3.81366	14.0613	49.056	2.48757e-12	3.48709e-10
Echdc2	6.36317	82.3198	4.1037	17.1924	46.0262	1.16682e-11	1.45978e-09
Neurod1	5.53304	46.3033	4.01288	16.1434	45.0466	1.92401e-11	2.30782e-09
Angpt1	5.27705	38.7748	4.70026	25.9968	44.201	2.96325e-11	3.44775e-09
Gins1	6.10059	68.6216	4.17273	18.0351	44.1137	3.09843e-11	3.56933e-09
Acsbg1	4.62948	24.7521	4.40689	21.2132	43.7697	3.6938e-11	4.13244e-09
Mndal	4.94015	30.6997	4.31702	19.9321	43.6479	3.93092e-11	4.35584e-09
Kitl	3.56803	11.86	5.56965	47.4934	42.5632	6.84342e-11	7.23848e-09
Slit3	4.49997	22.6269	4.70835	26.143	42.0149	9.05797e-11	9.3265e-09
Ccdc153	9.09995	548.729	3.48051	11.1619	40.7655	1.71639e-10	1.66418e-08
Nhlh2	9.10313	549.938	3.27649	9.68998	40.7317	1.74627e-10	1.67916e-08
Sema3e	3.55415	11.7464	5.40245	42.296	40.4609	2.00586e-10	1.89741e-08
Zfp238	4.5806	23.9276	4.1559	17.8259	39.6307	3.06824e-10	2.85592e-08
Kcnk1	3.33604	10.0983	6.07383	67.3606	39.6113	3.09881e-10	2.86148e-08
Slc25a18	8.97499	503.201	3.27426	9.67497	38.7611	4.78986e-10	4.22197e-08
2010300C02Rik	4.77127	27.3084	4.0593	16.6713	38.7044	4.931e-10	4.3137e-08
Rbp1	9.01845	518.589	3.13316	8.77354	38.6744	5.00724e-10	4.3477e-08
Arl6	4.32226	20.0046	4.9866	31.7041	38.0374	6.94019e-10	5.8941e-08
Lhx9	8.89234	475.183	3.09212	8.52747	37.1444	1.09698e-09	8.8023e-08
Cpne9	8.91927	484.138	3.20025	9.19116	36.9868	1.18934e-09	9.47804e-08
Lrrc48	8.82656	454.004	3.76719	13.6156	36.6478	1.41521e-09	1.08329e-07
Rab40b	4.24488	18.9599	4.36847	20.6557	36.1432	1.83339e-09	1.3674e-07
Slc1a3	2.93717	7.65908	6.97012	125.376	36.1233	1.85215e-09	1.37259e-07
Zbtb20	3.11918	8.68896	6.07249	67.2977	35.6954	2.3071e-09	1.65698e-07
Htra1	3.48631	11.2069	4.98852	31.7464	35.2707	2.86923e-09	2.03558e-07
Mmd2	3.17012	9.00119	7.03968	131.57	34.5144	4.23105e-09	2.93025e-07
Kif9	8.73296	425.485	3.16266	8.95482	34.4534	4.36569e-09	3.00561e-07
Islr2	3.32207	10.001	6.96479	124.914	34.1588	5.0792e-09	3.45593e-07
Tmsb15l	8.73677	426.609	3.32714	10.0362	34.022	5.44911e-09	3.68607e-07
Ifi203	8.70523	417.382	2.897	7.44877	33.7255	6.34619e-09	4.24356e-07
Cbs	5.43325	43.2088	3.48794	11.2195	32.8072	1.01768e-08	6.61495e-07
Slco1c1	4.29557	19.6379	4.43783	21.6731	32.7223	1.06308e-08	6.87164e-07
Vim	4.2599	19.1583	5.02754	32.6166	32.6989	1.07597e-08	6.91655e-07
Rmst	8.50273	362.724	3.05672	8.32077	31.8815	1.63866e-08	1.03059e-06
Actr3b	3.01098	8.0611	7.02859	130.562	31.7969	1.71166e-08	1.06498e-06
Klhdc8a	8.58066	382.856	2.91974	7.56708	31.4607	2.03513e-08	1.24625e-06
Prdm8	5.41144	42.5605	3.17621	9.03927	31.3976	2.1024e-08	1.27403e-06
Meis2	4.31953	19.9668	3.82754	14.1972	31.1597	2.37643e-08	1.43263e-06
Tdo2	8.41891	342.251	2.72638	6.61794	30.4005	3.51435e-08	2.02423e-06
Car12	4.59159	24.1104	3.4849	11.1959	30.3629	3.58314e-08	2.04362e-06
Emx1	5.26458	38.4412	3.07616	8.4337	30.3425	3.6211e-08	2.0552e-06
Ltbp2	8.50875	364.242	2.73246	6.64589	30.2635	3.77162e-08	2.11994e-06
Epha4	2.71743	6.577	9.11374	554	30.2091	3.87885e-08	2.16973e-06
Tekt1	8.37929	332.979	2.75607	6.75555	29.9388	4.45892e-08	2.44715e-06
Cd24a	2.80913	7.0086	5.87424	58.6575	29.918	4.507e-08	2.45042e-06
Rprml	4.57642	23.8583	3.34457	10.1582	29.3675	5.98734e-08	3.19554e-06
Rfx3	2.83164	7.11884	6.73273	106.354	28.8499	7.82106e-08	4.04436e-06
Col1a2	4.5158	22.8766	3.18002	9.06319	28.2849	1.0471e-07	5.32011e-06
Zbtb8os	8.25609	305.724	3.20899	9.24701	27.8558	1.30705e-07	6.52684e-06
Vwa3a	8.20444	294.974	2.71185	6.55161	27.7824	1.35754e-07	6.73815e-06
Riiad1	8.21265	296.657	2.5426	5.82636	27.7499	1.38056e-07	6.80018e-06
Kcnn1	4.46873	22.1423	3.82962	14.2177	27.661	1.4455e-07	7.06657e-06
Gpr26	4.05209	16.5883	3.53339	11.5786	27.5849	1.50351e-07	7.31938e-06
Ccdc46	3.32687	10.0343	4.57118	23.7718	27.5604	1.52266e-07	7.38172e-06
Spag17	8.17404	288.822	3.04633	8.26109	27.509	1.56363e-07	7.53514e-06
Pcp4	2.86357	7.27816	5.13174	35.0597	27.335	1.71086e-07	8.12484e-06
Vav3	3.46311	11.0281	4.45442	21.9237	27.1431	1.88941e-07	8.8857e-06
Trp53	4.20084	18.3899	3.78498	13.7846	27.1039	1.92811e-07	9.00945e-06
Prkcg	2.81482	7.0363	5.77285	54.6765	27.0348	1.99822e-07	9.29972e-06
Phyhip	3.53277	11.5736	3.81392	14.0638	26.8751	2.17034e-07	1.00605e-05
Cib1	5.02158	32.4822	3.12244	8.70859	26.8237	2.22888e-07	1.02502e-05
A430033K04Rik	4.11247	17.2972	3.77436	13.6835	26.7695	2.29222e-07	1.05e-05
Itga4	3.49104	11.2437	4.19523	18.3185	26.5652	2.54791e-07	1.14903e-05
Armc3	8.39023	335.515	2.52853	5.76983	26.5106	2.62094e-07	1.17546e-05
Palmd	4.99435	31.875	3.16656	8.97904	26.4495	2.70523e-07	1.20595e-05
Wdr78	4.38824	20.9407	3.33289	10.0763	26.3218	2.89011e-07	1.27857e-05
Sstr2	3.71929	13.171	3.89062	14.8318	26.2961	2.92872e-07	1.29075e-05
Osbpl7	5.05438	33.2291	3.53486	11.5904	26.2371	3.01962e-07	1.3208e-05
Emp1	8.07193	269.087	2.71953	6.58658	26.2243	3.03968e-07	1.3246e-05
Zfp277	2.85611	7.24059	5.47038	44.3351	26.1881	3.09726e-07	1.34454e-05
Plin3	8.1168	277.588	2.81582	7.0412	26.1633	3.13728e-07	1.35194e-05
Aqp4	3.63974	12.4644	5.14993	35.5045	26.1045	3.23435e-07	1.38862e-05
Slc7a11	8.06424	267.656	2.92508	7.59517	26.0789	3.27739e-07	1.39679e-05
Tspan18	3.09933	8.57018	4.40163	21.136	26.0592	3.31109e-07	1.40089e-05
Ssx2ip	2.39275	5.25157	7.54014	186.126	26.0635	3.30366e-07	1.40089e-05
Nefl	2.80889	7.00745	6.60034	97.0289	25.8712	3.64974e-07	1.53858e-05
Tmsb15b2	3.35112	10.2044	4.25444	19.0859	25.751	3.88416e-07	1.63149e-05
Ttc26	4.90907	30.0453	3.72045	13.1815	25.33	4.83133e-07	1.99335e-05
6030405A18Rik	2.58907	6.01712	5.91927	60.5169	25.2894	4.93403e-07	2.02853e-05
Gstm1	4.91629	30.1961	3.05289	8.29875	25.2043	5.1567e-07	2.10747e-05
Hydin	4.30036	19.7032	3.06639	8.37674	25.2022	5.16225e-07	2.10747e-05
Trp73	8.1068	275.67	2.42621	5.37479	25.1303	5.35837e-07	2.15928e-05
Aldoc	2.49162	5.6241	6.14426	70.7307	24.9687	5.82684e-07	2.31383e-05
Fgfr3	3.84323	14.3525	3.74742	13.4303	24.9259	5.95769e-07	2.34975e-05
Gpc2	3.62744	12.3586	5.52256	45.968	24.8321	6.25467e-07	2.42123e-05
Ggct	7.95903	248.833	3.16528	8.97105	24.8069	6.33705e-07	2.44144e-05
Erdr1	8.08113	270.809	3.44732	10.9081	24.774	6.44602e-07	2.46709e-05
Ccdc21	4.27777	19.3971	4.22739	18.7315	24.7132	6.65263e-07	2.53782e-05
Prdx6	2.71205	6.55251	5.44089	43.438	24.6352	6.92756e-07	2.62548e-05
Axin2	4.2334	18.8097	3.38696	10.4611	24.5413	7.27353e-07	2.72114e-05
Tnfrsf19	2.67756	6.39772	5.2733	38.6742	24.5453	7.2583e-07	2.72114e-05
Wdr96	7.96265	249.457	2.37223	5.1774	24.4911	7.46557e-07	2.78404e-05
Trip10	8.03757	262.754	2.72691	6.62034	24.3086	8.20728e-07	3.03148e-05
Ccdc114	8.089	272.289	2.37298	5.18011	24.1614	8.85905e-07	3.25158e-05
Olfml2b	3.09525	8.54598	4.08297	16.9471	24.1465	8.92804e-07	3.25891e-05
Adamts18	2.77998	6.86842	4.72786	26.499	24.0402	9.4344e-07	3.40898e-05
Pon2	4.2001	18.3804	3.4137	10.6568	23.9379	9.94941e-07	3.58394e-05
Dnahc6	7.90439	239.585	2.38316	5.21679	23.9248	1.00174e-06	3.5973e-05
Lrrc23	7.87786	235.219	2.56906	5.93421	23.9164	1.00611e-06	3.60187e-05
Zmat5	4.78722	27.6119	3.23018	9.38386	23.5404	1.22317e-06	4.3126e-05
Cecr2	3.76838	13.6268	3.52236	11.4905	23.5306	1.22945e-06	4.32163e-05
Angptl6	7.89876	238.652	2.96448	7.80545	23.4792	1.26272e-06	4.41194e-05
Brdt	4.21061	18.5149	3.46589	11.0493	23.3252	1.36795e-06	4.73692e-05
Bmpr1b	7.88063	235.671	2.76703	6.80705	23.2957	1.38913e-06	4.796e-05
Mtg1	3.26705	9.62677	4.50469	22.7011	23.2569	1.41741e-06	4.87915e-05
Tnc	2.42384	5.36598	5.53681	46.4243	23.2227	1.44283e-06	4.95203e-05
Fam131a	2.35806	5.12681	6.50237	90.6587	22.9563	1.65729e-06	5.58916e-05
Insc	4.82011	28.2487	2.75027	6.72845	22.879	1.72523e-06	5.78475e-05
Apool	7.77608	219.197	3.26569	9.61766	22.7304	1.86396e-06	6.19633e-05
Leprel4	4.73225	26.5796	3.214	9.27918	22.5798	2.01597e-06	6.6447e-05
Crip2	2.55954	5.89519	4.82577	28.3596	22.478	2.12568e-06	6.90846e-05
Tmem150c	2.6967	6.48317	4.46493	22.084	22.4709	2.1335e-06	6.91455e-05
Wfs1	3.71927	13.1708	3.39505	10.5199	22.4635	2.1418e-06	6.92217e-05
Selenbp1	3.73366	13.3028	3.2719	9.65917	22.329	2.29712e-06	7.3628e-05
Lepr	7.73787	213.467	2.31663	4.98167	22.2705	2.3682e-06	7.56539e-05
Vcam1	3.05137	8.29001	4.28586	19.5062	22.2663	2.37333e-06	7.56539e-05
Akt2	2.72299	6.60238	5.61912	49.1501	22.2281	2.42103e-06	7.69635e-05
Grhl1	3.69981	12.9943	3.32677	10.0336	22.1601	2.5083e-06	7.93047e-05
Bcl6	4.06558	16.7441	3.2115	9.26313	22.0993	2.58907e-06	8.14157e-05
Itgbl1	4.08638	16.9873	3.00564	8.03134	22.0103	2.71193e-06	8.48206e-05
2900079G21Rik	4.64407	25.0037	3.09648	8.55328	21.9634	2.77897e-06	8.64529e-05
Ppp1r3c	4.04516	16.5088	2.92615	7.60079	21.9541	2.79251e-06	8.66421e-05
Pex5l	2.86151	7.26774	5.51456	45.7138	21.911	2.85599e-06	8.8376e-05
Armc9	2.79316	6.93145	5.12621	34.9256	21.8211	2.99296e-06	9.23689e-05
Klk8	7.70639	208.86	2.69761	6.48727	21.8049	3.01825e-06	9.26579e-05
Atp2b1	2.19131	4.56719	9.50844	728.327	21.8054	3.01746e-06	9.26579e-05
Ift74	2.60593	6.08782	5.97602	62.9452	21.7818	3.0549e-06	9.32907e-05
Bdnf	3.98468	15.831	2.89426	7.43461	21.7422	3.11854e-06	9.47367e-05
Gjc1	7.73618	213.217	2.26429	4.80418	21.6384	3.29198e-06	9.92284e-05
Stard10	7.74802	214.974	2.35161	5.10394	21.6179	3.32732e-06	0.000100035
Ctsh	3.80102	13.9386	4.20995	18.5064	21.5417	3.46217e-06	0.000103554
Xlr	7.67631	204.551	2.44715	5.45339	21.5334	3.47712e-06	0.000103734
Itga7	3.56489	11.8342	3.47271	11.1017	21.514	3.51257e-06	0.000103992
Trnau1ap	2.48012	5.57943	5.74196	53.5181	21.4172	3.69451e-06	0.00010855
Gpr37	3.39585	10.5257	3.33082	10.0618	21.3855	3.75606e-06	0.000109585
Tmem90b	2.8199	7.06112	4.42788	21.5242	21.2636	4.00252e-06	0.000115844
1500012F01Rik	2.42557	5.37241	6.28833	78.1583	21.2219	4.09058e-06	0.000117807
Mia1	3.99267	15.9189	2.87618	7.34205	21.1814	4.1779e-06	0.000119729
Rpusd3	7.63717	199.076	2.75255	6.73905	21.161	4.2228e-06	0.000120718
Lrp2	7.64213	199.761	2.21805	4.65264	21.1508	4.24523e-06	0.000121062
Slc26a4	7.64867	200.668	2.14428	4.42073	21.0993	4.36089e-06	0.000124056
Lct	4.60512	24.3376	2.64271	6.24503	21.0744	4.41798e-06	0.000125069
Zfp599	7.61575	196.142	2.27228	4.83086	20.9841	4.63118e-06	0.000130786
Tor2a	3.59094	12.0499	3.63779	12.4475	20.9174	4.79531e-06	0.000135093
Dclk3	7.61513	196.057	2.57681	5.96617	20.8757	4.90084e-06	0.000137401
Orai2	2.42875	5.38426	5.06911	33.5701	20.8392	4.99491e-06	0.000139701
Ppic	7.58875	192.505	2.21792	4.65224	20.7488	5.23634e-06	0.000145251
Mctp1	2.34618	5.08475	6.54951	93.6699	20.7463	5.24328e-06	0.000145251
Itih5	7.56412	189.246	2.41568	5.3357	20.4782	6.03147e-06	0.000165901
Pla2g7	2.36087	5.13679	5.03162	32.7091	20.4388	6.15683e-06	0.000168552
Vmn2r1	7.56207	188.977	2.37733	5.19573	20.3947	6.30044e-06	0.000171275
Hmg20b	7.61122	195.526	2.22981	4.69071	20.2631	6.749e-06	0.000182192
Lpl	2.16352	4.48006	6.44541	87.1486	20.2456	6.81082e-06	0.000182608
Cyp4f17	7.59362	193.155	2.23115	4.69507	20.2258	6.88184e-06	0.00018407
Map4k1	7.53411	185.351	2.48561	5.60072	20.1777	7.05722e-06	0.000188328
Fmo1	7.59992	194.001	2.15728	4.46073	20.0338	7.6086e-06	0.000200285
Nsun3	7.49756	180.714	2.75898	6.76918	19.8479	8.38534e-06	0.000217345
Mfge8	2.47935	5.57645	5.10776	34.4818	19.8474	8.38746e-06	0.000217345
Tsen2	3.38554	10.4508	5.31527	39.8158	19.783	8.67487e-06	0.000223796
Gldc	3.08942	8.51155	4.2949	19.6288	19.6479	9.31036e-06	0.00023913
Mms22l	7.48094	178.643	3.04265	8.24004	19.5553	9.77285e-06	0.000249906
Sh2d4b	7.46487	176.664	2.3183	4.98745	19.492	1.01023e-05	0.000257201
Fam107a	7.4669	176.914	2.15313	4.4479	19.4795	1.01684e-05	0.000258318
Pla2g16	7.47253	177.605	2.31441	4.97402	19.4752	1.01917e-05	0.000258345
3110003A17Rik	2.66226	6.33022	4.20547	18.449	19.4061	1.05667e-05	0.00026669
Nr4a3	3.39931	10.551	3.31875	9.97796	19.3881	1.06672e-05	0.000268644
Ecel1	7.50598	181.771	2.77257	6.83322	19.3348	1.09692e-05	0.00027565
Zfp93	4.45191	21.8856	3.10832	8.62376	19.2606	1.14037e-05	0.000285337
Gdpd2	7.45302	175.22	2.31879	4.98914	19.2149	1.16799e-05	0.000290997
Prdm5	2.32938	5.0259	4.85453	28.9307	19.1418	1.2136e-05	0.00030107
Dera	3.21487	9.28477	3.66131	12.6521	19.0978	1.24186e-05	0.000306888
Nefm	3.23205	9.39605	3.17583	9.03693	19.0759	1.25618e-05	0.000309654
Nudt1	3.53045	11.555	3.66174	12.6559	19.0358	1.2829e-05	0.000314907
Lamtor3	2.60665	6.09088	6.23911	75.5368	19.0247	1.29039e-05	0.000315511
Mtmr14	2.36091	5.13693	5.33999	40.5038	19.0241	1.29079e-05	0.000315511
Prss12	3.34441	10.157	3.7851	13.7857	18.9409	1.34831e-05	0.000328881
Spag16	7.40784	169.817	2.0128	4.03565	18.8751	1.39563e-05	0.000339002
Slc14a1	4.38785	20.9351	2.63139	6.19622	18.8645	1.40341e-05	0.000339474
Vamp8	7.39212	167.977	2.58385	5.99539	18.7997	1.45187e-05	0.000350466
Ankrd6	2.25558	4.77528	5.49076	44.966	18.773	1.47237e-05	0.000354681
Dbi	2.3698	5.16869	6.93034	121.966	18.7501	1.49013e-05	0.000358217
Chaf1b	7.5097	182.24	2.23668	4.71311	18.7262	1.50892e-05	0.000361986
Grp	7.38986	167.715	2.1261	4.36537	18.7122	1.52006e-05	0.000363159
Zfp423	7.3827	166.884	2.5822	5.98852	18.672	1.55249e-05	0.000368637
Pbxip1	2.86049	7.26263	3.47025	11.0828	18.6751	1.54995e-05	0.000368637
Rasl10a	7.3933	168.114	2.13534	4.39341	18.6649	1.55827e-05	0.000369257
Paqr8	2.96166	7.79021	4.10622	17.2224	18.6454	1.57424e-05	0.000371528
Lhx2	2.68847	6.44632	4.22855	18.7465	18.6061	1.60705e-05	0.000378064
Emp2	7.39664	168.505	2.28457	4.8722	18.5849	1.62507e-05	0.000380436
Nts	3.15082	8.88158	3.4241	10.7339	18.5854	1.62457e-05	0.000380436
Decr1	3.11122	8.64111	4.32252	20.0082	18.5042	1.69529e-05	0.000396078
Lmo7	2.57843	5.97291	5.86381	58.2348	18.4612	1.73402e-05	0.000404316
Robo3	7.40533	169.523	1.98911	3.96993	18.4445	1.74927e-05	0.000407056
Gramd1c	3.80273	13.9552	3.02731	8.15288	18.3974	1.793e-05	0.000415568
Pygl	7.36141	164.439	2.55752	5.88693	18.3896	1.80033e-05	0.000415613
Rasgrp1	2.40948	5.31284	6.20317	73.6784	18.3912	1.79888e-05	0.000415613
Fam19a1	3.76326	13.5786	2.91756	7.55568	18.3728	1.81632e-05	0.000418472
Lmo3	2.30864	4.95415	5.46876	44.2856	18.3469	1.8412e-05	0.000423367
Col12a1	3.04147	8.2333	4.92635	30.4074	18.3392	1.84863e-05	0.000423839
Zc3hc1	2.17061	4.50215	5.82812	56.812	18.3372	1.85054e-05	0.000423839
Fam64a	7.35352	163.542	2.22119	4.66279	18.2975	1.88951e-05	0.000431067
Itga8	3.06827	8.38764	4.37902	20.8073	18.2682	1.9188e-05	0.000436894
Igsf1	3.30688	9.89624	3.98944	15.8834	18.197	1.99193e-05	0.000450897
Ccdc101	4.31633	19.9226	4.03556	16.3993	18.1165	2.07798e-05	0.000466744
Mxra8	7.30739	158.396	2.02609	4.07299	18.0363	2.1673e-05	0.000484002
Hpca	2.21827	4.65335	5.81859	56.4379	18.0081	2.19964e-05	0.000490285
Styk1	7.31845	159.614	2.43513	5.40814	17.979	2.23355e-05	0.000494057
Smo	3.49228	11.2533	3.11644	8.67243	17.9687	2.24562e-05	0.000495784
Adamts2	7.31165	158.864	2.14758	4.43084	17.9344	2.28647e-05	0.000502332
Msra	2.10412	4.29935	6.27954	77.6836	17.9343	2.2866e-05	0.000502332
Gck	7.30214	157.82	2.15841	4.46422	17.9193	2.30472e-05	0.000505
Wdyhv1	4.38614	20.9102	2.58415	5.99664	17.9057	2.32122e-05	0.000507657
Gal	4.30468	19.7624	2.40819	5.30808	17.8842	2.34762e-05	0.000511509
Ppp1r14c	2.38298	5.21613	5.8205	56.5124	17.7903	2.46631e-05	0.000535365
Rwdd3	2.61047	6.10704	4.42349	21.4586	17.7506	2.51841e-05	0.000543632
6820408C15Rik	7.31063	158.752	2.02259	4.06312	17.6976	2.58953e-05	0.000557948
Gstm6	7.41872	171.103	2.64596	6.25911	17.6659	2.633e-05	0.00056522
Zfp184	2.69878	6.49254	3.83602	14.281	17.6393	2.67006e-05	0.00057107
Ryr1	2.54725	5.84518	4.34724	20.3541	17.5894	2.74107e-05	0.00058518
Ccdc109b	4.30463	19.7617	3.23155	9.39275	17.5551	2.79095e-05	0.000594237
Zfp68	2.15473	4.45285	6.08486	67.8775	17.5533	2.79371e-05	0.000594237
Cxcl12	7.25908	153.179	2.04664	4.13142	17.5317	2.82558e-05	0.000598828
Zfpm2	2.61493	6.12591	4.41695	21.3617	17.5193	2.8441e-05	0.000600565
P2rx5	4.25648	19.113	2.43397	5.40379	17.4497	2.95009e-05	0.000618038
Nphp1	3.06533	8.37062	4.53305	23.1518	17.4267	2.98596e-05	0.000622611
Srl	2.61415	6.12261	3.79771	13.9067	17.3883	3.04703e-05	0.000633075
Nfia	2.04617	4.13009	6.16818	71.9127	17.3492	3.11034e-05	0.000643929
Tctn2	4.25309	19.0682	3.37538	10.3775	17.3432	3.12007e-05	0.000644371
Ttc12	4.2889	19.5474	2.58916	6.0175	17.3092	3.17651e-05	0.00065298
Cys1	7.23513	150.658	2.05831	4.16498	17.2606	3.25882e-05	0.00066872
Naa16	3.32942	10.0521	3.45067	10.9334	17.1791	3.40165e-05	0.000695574
Tyms	3.20833	9.24277	3.99579	15.9534	17.1643	3.4282e-05	0.000698548
Nckap5	2.31039	4.96016	4.66786	25.4194	17.0384	3.6631e-05	0.000738652
Tmem107	7.24412	151.599	2.33687	5.05205	17.02	3.69877e-05	0.000743268
Ifrd2	7.24091	151.262	2.11694	4.33774	17.0225	3.69388e-05	0.000743268
Mrps31	2.62557	6.17129	4.91353	30.1383	16.9929	3.75195e-05	0.000751556
Zdhhc23	3.63155	12.3939	2.91914	7.56396	16.9565	3.82464e-05	0.000763289
Gcnt2	4.21357	18.5528	2.62668	6.17605	16.9487	3.84044e-05	0.00076513
Myoc	4.24456	18.9557	2.29707	4.9146	16.942	3.85385e-05	0.000766488
4933404M02Rik	7.21797	148.877	2.02177	4.06082	16.9302	3.87787e-05	0.00076995
Tesc	4.21621	18.5869	2.54149	5.82191	16.92	3.89894e-05	0.000770189
Tead2	4.25757	19.1274	2.25791	4.78298	16.902	3.93607e-05	0.000776206
Ptx3	7.18227	145.238	1.91731	3.77719	16.8529	4.03922e-05	0.000792519
Cds1	2.81034	7.01452	5.16853	35.9653	16.8535	4.03788e-05	0.000792519
Ccdc13	7.18852	145.868	2.07496	4.21333	16.8488	4.04784e-05	0.000792872
Cdc42bpg	3.67204	12.7466	2.52856	5.76996	16.8372	4.07269e-05	0.000796106
1810058I24Rik	3.62091	12.3028	3.24362	9.47169	16.8175	4.11515e-05	0.000802007
BC031781	2.33341	5.03995	5.02957	32.6626	16.8053	4.14181e-05	0.000805853
Lemd1	4.20198	18.4045	2.63241	6.20062	16.7885	4.17865e-05	0.000811662
Nab2	3.60183	12.1412	3.17816	9.0515	16.7633	4.23436e-05	0.000821113
Kcnab3	3.06316	8.35801	3.23551	9.41856	16.5555	4.72477e-05	0.000910145
S100a10	2.85324	7.2262	4.66829	25.4269	16.5432	4.75539e-05	0.000914528
Fibcd1	2.8073	6.99974	3.72187	13.1946	16.5367	4.77183e-05	0.000916177
Dpf3	2.26886	4.81941	4.67306	25.5113	16.4346	5.03586e-05	0.000962105
Kntc1	2.98366	7.90992	4.23426	18.8209	16.415	5.08799e-05	0.000970472
Mlf1ip	7.1463	141.661	2.28478	4.87291	16.4041	5.11749e-05	0.000974502
Phkg1	7.14985	142.01	1.97565	3.93307	16.3906	5.15414e-05	0.000979877
1810030N24Rik	3.16379	8.96179	3.02778	8.15555	16.3118	5.37288e-05	0.00101155
Ier5	2.29115	4.89445	4.8409	28.6586	16.3127	5.37025e-05	0.00101155
Kctd4	2.37082	5.17236	3.95915	15.5533	16.1976	5.70671e-05	0.00106577
Impg2	4.14833	17.7326	2.85725	7.2463	16.1788	5.76367e-05	0.00107041
Rarres2	3.21155	9.26343	2.82608	7.09146	16.1775	5.7674e-05	0.00107041
Dnajb5	2.32778	5.02031	4.37471	20.7452	16.1708	5.78797e-05	0.00107064
1300017J02Rik	3.64148	12.4794	2.40374	5.29172	16.0177	6.27545e-05	0.00115713
Dhrs4	3.54721	11.69	2.77739	6.85612	16.0111	6.29714e-05	0.00115929
Sorcs2	2.18139	4.5359	5.20893	36.9867	15.9978	6.34174e-05	0.00116382
Adra2c	2.72804	6.62554	3.47008	11.0815	15.831	6.92568e-05	0.00125907
Ddx52	2.35952	5.13201	5.48155	44.6799	15.8078	7.01122e-05	0.00127263
Gm10754	6.91026	120.281	2.02344	4.06551	15.7525	7.2193e-05	0.00130632
Miip	2.63191	6.19847	4.00872	16.097	15.6589	7.58533e-05	0.00135987
Tmem144	7.03094	130.775	2.63927	6.23015	15.572	7.94212e-05	0.00141235
Echdc1	2.50251	5.66669	4.80703	27.9936	15.5699	7.95089e-05	0.00141235
Doc2g	3.07571	8.43104	3.67664	12.7873	15.5402	8.07685e-05	0.00143035
Gm7173	7.08081	135.374	2.43657	5.41353	15.5235	8.14862e-05	0.00143837
Fam100b	3.56904	11.8683	2.79043	6.91837	15.4743	8.36352e-05	0.00146993
Ndst4	2.87889	7.35582	3.80814	14.0077	15.4026	8.68704e-05	0.00151762
Eed	2.12099	4.34993	4.88911	29.6325	15.3895	8.74729e-05	0.00152357
Tjp3	7.0091	128.81	2.77435	6.84167	15.3237	9.05726e-05	0.00157114
Zfp583	4.04739	16.5343	2.5818	5.98688	15.323	9.06088e-05	0.00157114
Anxa2	2.78706	6.90221	3.60784	12.1918	15.3056	9.14448e-05	0.00158092
Tada3	3.46977	11.0791	3.46138	11.0149	15.3011	9.16644e-05	0.00158237
Foxp1	2.28453	4.87205	5.30866	39.6338	15.2804	9.2674e-05	0.00159743
Tspan33	4.09412	17.0786	2.58811	6.01309	15.258	9.37796e-05	0.00161409
Fam163a	2.44278	5.43689	4.00669	16.0744	15.2374	9.48052e-05	0.00162693
Ccl25	3.15102	8.88286	2.86842	7.30264	15.1971	9.6851e-05	0.00165229
Snora52	4.17952	18.1202	2.52796	5.76754	15.1797	9.77505e-05	0.00166519
Pkp2	3.03834	8.21544	2.89568	7.44197	15.0928	0.000102353	0.00174104
Rab11fip2	2.08314	4.23729	5.22988	37.5275	15.0868	0.000102678	0.00174403
Lypd1	2.07481	4.21289	4.89898	29.8359	15.0474	0.000104844	0.00177822
6720463M24Rik	4.03551	16.3987	2.55115	5.86103	15.0379	0.000105375	0.00178463
Dom3z	4.01816	16.2027	3.11778	8.68052	15.0212	0.000106308	0.0017952
Zfp101	2.66783	6.35471	3.92048	15.142	15.0063	0.000107152	0.00180422
Thrsp	3.02489	8.1392	2.8784	7.35335	15.0032	0.000107328	0.00180457
Cwc27	2.13558	4.39413	4.92538	30.387	14.997	0.000107684	0.00180794
Npm3	2.07621	4.21699	4.97719	31.498	14.9693	0.000109277	0.0018295
Sbsn	3.0606	8.34318	3.88944	14.8196	14.9089	0.00011283	0.00188077
Usp1	2.20392	4.6073	4.36793	20.648	14.8615	0.0001157	0.00192036
Stxbp6	2.10163	4.29194	4.73994	26.7218	14.8165	0.000118494	0.00196393
Myom1	6.95489	124.06	1.99521	3.98675	14.8117	0.000118795	0.00196611
Rbfox1	2.04199	4.11814	7.2721	154.568	14.8087	0.000118984	0.00196645
Commd4	2.24732	4.74801	4.70025	25.9965	14.805	0.000119221	0.00196756
Tmem74	2.62313	6.16087	3.34334	10.1495	14.7569	0.000122302	0.00201271
Boc	3.9845	15.829	2.41558	5.33533	14.724	0.000124449	0.00204226
Fgfr1	3.41107	10.6374	6.34771	81.4427	14.7066	0.000125608	0.0020526
2510012J08Rik	2.53756	5.80607	4.12981	17.5063	14.7088	0.000125459	0.0020526
Cep57	2.07208	4.20494	5.05428	33.227	14.6736	0.000127821	0.00208583
2610307P16Rik	6.92763	121.738	2.04374	4.12314	14.661	0.000128684	0.00209697
Pax6	3.41437	10.6618	3.05285	8.29849	14.6347	0.000130488	0.0021151
Dact1	2.27474	4.83911	4.2606	19.1676	14.5746	0.00013472	0.00217704
Bcl11a	2.01156	4.03217	5.11075	34.5532	14.5713	0.000134951	0.00217775
Vps37b	2.37524	5.18822	3.89946	14.923	14.4683	0.000142536	0.00229062
Lfng	4.06509	16.7384	2.37712	5.195	14.439	0.000144769	0.00231691
Hepacam	6.92136	121.21	2.82852	7.10347	14.4161	0.000146541	0.00234203
Daam2	2.89639	7.44563	3.54807	11.697	14.4012	0.00014771	0.00235748
Dnahc9	2.28847	4.88538	4.80247	27.9053	14.3738	0.000149871	0.0023887
Abcd4	3.97653	15.7418	3.61683	12.2681	14.3615	0.000150855	0.00239781
Tmem179b	6.88672	118.334	2.6455	6.25712	14.3391	0.00015266	0.00241989
Thg1l	3.05108	8.28833	3.42703	10.7557	14.3112	0.000154943	0.00244676
Kcnh3	2.40079	5.28094	3.67734	12.7935	14.3106	0.000154986	0.00244676
Med4	2.11079	4.31928	4.8336	28.5139	14.2389	0.000161008	0.00252811
Epsti1	7.02253	130.015	2.39588	5.26297	14.2307	0.000161714	0.00253578
Prom1	2.68015	6.40923	3.79105	13.8426	14.2093	0.000163563	0.00256131
Slc16a2	2.43963	5.42503	3.87057	14.6271	14.2015	0.000164238	0.00256842
Adamts19	3.96162	15.58	2.12199	4.35294	14.1903	0.000165216	0.00258026
Lrrc33	6.8647	116.541	2.52097	5.73969	14.1498	0.000168816	0.00262514
Ubox5	3.44834	10.9157	2.61038	6.10665	14.1478	0.000168993	0.00262514
Nptx1	2.59057	6.02338	3.49134	11.246	14.1448	0.000169261	0.0026258
Dapp1	2.80179	6.97304	3.24115	9.45547	14.1342	0.000170223	0.0026372
Arhgef25	2.10978	4.31624	6.54251	93.2165	14.1188	0.000171618	0.00264825
Tsga14	6.83357	114.054	2.68036	6.41017	14.0704	0.000176093	0.00271011
Wnt7b	3.35595	10.2386	3.32776	10.0405	14.0585	0.000177215	0.00272377
Ddr1	2.06942	4.19718	4.67001	25.4574	13.9715	0.000185604	0.00284145
BC002230	2.00394	4.01093	4.96923	31.3247	13.9406	0.000188683	0.0028848
Mcm7	2.19732	4.58625	5.40878	42.4821	13.9324	0.000189508	0.0028936
Ak7	3.34029	10.1281	2.68995	6.45293	13.8722	0.00019567	0.00297597
Axl	2.99353	7.9642	3.07972	8.45451	13.8499	0.000198011	0.00300765
Id3	2.52514	5.75631	4.20391	18.4291	13.7546	0.000208309	0.00314355
Notch3	3.88529	14.7771	2.27383	4.83605	13.7236	0.000211782	0.00318356
Mettl1	3.933	15.274	2.56427	5.91457	13.7151	0.000212735	0.00318965
Qtrtd1	2.04571	4.12875	4.45288	21.9004	13.6946	0.000215077	0.00320894
Haus4	6.78158	110.017	2.73806	6.67173	13.5227	0.000235697	0.00346255
Cd82	4.01072	16.1193	3.09699	8.55634	13.511	0.000237171	0.00347542
Ngdn	2.07998	4.228	5.91789	60.4592	13.487	0.000240224	0.00351132
Rsph1	6.78855	110.55	1.93674	3.82841	13.4527	0.000244656	0.00357005
Ddx31	2.68126	6.41418	4.64144	24.9582	13.4511	0.000244856	0.00357005
Mbd4	3.84339	14.3541	2.80491	6.98813	13.4071	0.000250678	0.00364124
1700019E19Rik	2.19971	4.59388	4.09312	17.0668	13.4006	0.00025154	0.00364921
Zscan2	2.99506	7.97267	3.02626	8.14693	13.3354	0.000260447	0.00376434
Snora64	3.83673	14.2879	2.37269	5.17907	13.2364	0.00027457	0.00395374
Slc25a16	2.09158	4.26216	4.37495	20.7488	13.2376	0.000274395	0.00395374
Brca2	2.66619	6.34753	3.52556	11.5159	13.0754	0.000299201	0.00428192
Tgds	3.26654	9.62338	3.58988	12.041	13.057	0.000302156	0.0043189
Banp	2.08839	4.25275	5.04979	33.1237	13.0538	0.000302677	0.0043191
Pelp1	2.30629	4.94611	4.46234	22.0443	13.0393	0.000305019	0.00433851
Ano5	2.39751	5.26892	3.47689	11.1339	13.0152	0.000308972	0.00438936
Jup	2.56057	5.89943	3.7003	12.9987	12.9979	0.000311843	0.00441936
Osbp2	2.30083	4.92743	4.53493	23.182	12.9841	0.000314143	0.00444113
Ptgr1	2.8573	7.24659	3.36279	10.2873	12.974	0.000315839	0.00445969
Col18a1	3.31307	9.93881	2.42837	5.38285	12.9564	0.000318822	0.00448548
Eif2ak2	2.87489	7.33546	3.32655	10.0321	12.9522	0.000319544	0.00449021
Ankrd33b	3.26997	9.64629	2.2618	4.79591	12.9421	0.000321272	0.00450904
Vtn	3.79998	13.9286	1.9884	3.96798	12.918	0.000325442	0.00455414
Grb14	2.32168	4.99914	3.74488	13.4067	12.9183	0.000325381	0.00455414
Gpr39	2.18222	4.5385	4.04851	16.5471	12.8761	0.000332802	0.00463731
Dsp	2.92923	7.61706	3.52269	11.493	12.8051	0.000345675	0.00479614
Mrpl45	2.25066	4.75899	4.4178	21.3741	12.8042	0.00034585	0.00479614
Rcor2	2.51124	5.70111	5.15153	35.544	12.7371	0.000358476	0.00494764
Irf1	2.56748	5.92774	4.00206	16.0228	12.7245	0.000360894	0.00497512
Dnajc12	3.23214	9.39661	3.07857	8.44775	12.5011	0.00040671	0.00552812
Utp23	3.76043	13.5519	2.51787	5.72736	12.4858	0.000410066	0.00556724
Gm5424	3.1933	9.14704	2.47999	5.57894	12.4329	0.000421828	0.0056937
Mtfr1	2.43561	5.40993	3.62648	12.3504	12.4142	0.000426084	0.00574449
Cutc	3.76555	13.6001	3.41801	10.6887	12.3836	0.00043311	0.00581898
Rapgef3	2.07561	4.21523	4.17325	18.0416	12.3664	0.000437132	0.00586625
Snrnp35	3.76919	13.6345	2.41433	5.3307	12.3528	0.000440319	0.0058954
Vrk2	2.49119	5.62242	3.19189	9.13805	12.3372	0.000444016	0.00593808
Irak1bp1	2.0952	4.27287	4.53021	23.1062	12.3164	0.00044899	0.00599771
Pex16	2.53482	5.79504	5.27299	38.6659	12.2885	0.000455763	0.00606035
Magohb	2.46237	5.51122	4.10641	17.2248	12.1745	0.000484471	0.00638372
Slc39a12	2.64997	6.27656	2.93757	7.66118	12.14	0.000493524	0.00646638
Capn3	2.76813	6.81225	4.8021	27.8982	12.1379	0.00049408	0.00646639
Lst1	3.16343	8.95957	2.44042	5.42801	12.1232	0.00049798	0.0065101
Exosc3	2.90409	7.48547	3.06821	8.38734	12.1161	0.00049988	0.0065203
Nme3	2.01398	4.03894	4.65812	25.2483	12.1086	0.000501895	0.00653925
Gin1	6.57311	95.2146	2.51875	5.73087	12.1063	0.000502517	0.00654002
Kif4	2.70147	6.50465	4.1572	17.8419	12.0464	0.000518927	0.00673255
Baiap2	2.14516	4.4234	5.29033	39.1336	12.046	0.000519046	0.00673255
Cdc45	2.65206	6.28565	3.33486	10.0901	12.0424	0.000520033	0.00673784
Tuft1	3.68555	12.8665	2.66353	6.33579	12.0237	0.000525273	0.00679816
Kcnk10	2.32083	4.99618	3.99098	15.9003	11.9961	0.000533127	0.0068845
Taf1a	2.35634	5.12071	4.35034	20.3978	11.9614	0.000543141	0.00699054
Col2a1	6.62297	98.563	2.47853	5.57328	11.9551	0.000544975	0.00699865
Cd38	3.69292	12.9325	1.92456	3.79621	11.9065	0.000559376	0.00717567
Ccdc81	3.71781	13.1574	2.0531	4.14997	11.8863	0.000565496	0.0072462
Hpcal1	3.66461	12.6811	3.32902	10.0493	11.8256	0.000584206	0.00744803
Slc50a1	2.71481	6.56505	3.83739	14.2945	11.8228	0.000585088	0.00744803
5330417C22Rik	2.46932	5.53784	3.96898	15.6596	11.8304	0.000582721	0.00744803
Mtbp	2.28657	4.87896	3.66878	12.7178	11.7271	0.00061595	0.0077813
Ankrd61	3.69294	12.9326	2.42302	5.36293	11.649	0.000642359	0.00807984
Kcnj4	2.69722	6.48549	2.90277	7.4786	11.6156	0.000654002	0.0082174
Rdh10	2.54898	5.85222	3.14838	8.86661	11.5946	0.000661434	0.00829287
R3hcc1	2.05645	4.15961	4.42684	21.5086	11.5584	0.000674426	0.00843757
Entpd2	3.10522	8.60528	2.36748	5.16041	11.5456	0.00067909	0.00847769
Gem	3.09098	8.52072	2.42454	5.36857	11.5251	0.000686626	0.00855342
Lyar	2.48714	5.60665	3.46291	11.0266	11.5139	0.000690778	0.00859594
Ccnb2	3.62555	12.3424	2.58771	6.01144	11.4771	0.000704588	0.00872116
Mdga1	2.82695	7.09573	3.9581	15.542	11.4449	0.00071692	0.00885495
Gja1	2.42251	5.36103	3.58205	11.9758	11.403	0.00073327	0.00900908
Harbi1	3.62565	12.3433	2.05794	4.16392	11.3513	0.000753942	0.00921441
Celsr1	2.74363	6.69753	2.67113	6.36928	11.3217	0.00076608	0.00933334
Met	2.00941	4.02616	4.40876	21.2408	11.3026	0.000773989	0.00941983
Tinf2	2.45183	5.47111	3.77366	13.6768	11.2271	0.000806123	0.00974973
Podxl	2.08318	4.23739	3.45506	10.9667	11.217	0.000810506	0.00979256
Glb1l	2.44859	5.45881	3.65936	12.635	11.2086	0.000814203	0.00981684
Nhedc2	3.69024	12.9084	2.30214	4.9319	11.179	0.000827301	0.00994386
Gas8	2.78217	6.87886	4.85608	28.9619	11.1301	0.000849398	0.0101154
Kif20a	2.06728	4.19096	4.15409	17.8036	11.0812	0.000872088	0.0103222
Rem2	2.55182	5.86375	2.99589	7.97723	11.0643	0.000880061	0.0103954
Acvr1c	2.78431	6.88905	2.61658	6.13294	11.038	0.00089263	0.0105225
Mis18bp1	6.42642	86.0094	2.7614	6.78053	10.9937	0.000914205	0.0107442
Rnf182	2.52247	5.74566	2.67859	6.4023	10.9697	0.000926151	0.0108517
Rnf166	2.55605	5.88095	2.97267	7.84989	10.9392	0.000941511	0.0109874
Nhlrc3	3.59517	12.0852	2.3364	5.05041	10.9338	0.000944243	0.0109887
Hyls1	2.52362	5.75023	3.00905	8.05036	10.7943	0.00101811	0.0117053
Dnalc4	2.18564	4.54929	3.49704	11.2905	10.752	0.00104168	0.0118939
Noc4l	2.34945	5.09628	4.3192	19.9623	10.7501	0.00104276	0.0118946
Eepd1	2.06392	4.18121	4.03189	16.3576	10.7366	0.0010504	0.0119571
Nsun7	3.53424	11.5854	2.28052	4.85852	10.7048	0.00106859	0.0120934
Gm16432	3.07373	8.4195	2.09171	4.26253	10.7038	0.00106918	0.0120934
Rbmx2	2.40754	5.3057	3.23336	9.40458	10.7051	0.00106842	0.0120934
2018-09-09	2.13983	4.4071	4.40916	21.2465	10.7009	0.00107083	0.0120962
Efemp2	2.2838	4.8696	3.6665	12.6978	10.6875	0.00107863	0.0121607
Chrdl1	3.51996	11.4714	2.53966	5.81453	10.629	0.00111327	0.0124907
Fbxo2	2.3124	4.96709	3.54786	11.6953	10.6017	0.00112985	0.0126468
Macrod1	2.97685	7.87266	2.61715	6.13537	10.5515	0.00116095	0.0128645
Abhd3	2.09894	4.28393	4.20133	18.3961	10.5518	0.00116073	0.0128645
Cldn10	2.5921	6.02977	3.08709	8.49777	10.5338	0.00117212	0.0129688
Ntf3	2.27231	4.83097	3.24373	9.4724	10.4614	0.00121898	0.01338
Pole	2.17009	4.50052	3.84456	14.3657	10.4483	0.00122761	0.0134392
Cox17	2.10565	4.30391	3.53265	11.5727	10.4233	0.00124438	0.0135947
Nwd1	2.43699	5.41512	4.28147	19.4469	10.4016	0.00125908	0.0137295
Tmtc1	2.04162	4.11707	4.47883	22.2977	10.403	0.0012581	0.0137295
BC024139	2.71346	6.55894	2.84704	7.1952	10.3612	0.0012869	0.0139674
Tsnaxip1	6.51052	91.1721	1.82308	3.53836	10.3534	0.00129235	0.0139875
Kctd15	2.28799	4.88377	3.66817	12.7124	10.2982	0.00133161	0.0142927
LOC626082	2.53796	5.80766	3.03823	8.21483	10.2623	0.00135778	0.0145066
Nedd9	2.54231	5.82523	3.60568	12.1736	10.2536	0.00136419	0.0145351
1500016L03Rik	6.49627	90.2758	1.81179	3.51077	10.2389	0.00137512	0.0146248
Sec14l2	2.45408	5.47963	3.06584	8.37357	10.1914	0.00141099	0.014938
Mastl	3.46378	11.0332	2.55768	5.88761	10.1812	0.0014188	0.015007
Tbr1	2.09904	4.28423	2.99592	7.97742	10.16	0.0014352	0.0150982
Pou3f1	2.22583	4.6778	2.84219	7.17106	10.1318	0.0014573	0.0153029
Coq4	2.36231	5.14194	4.37687	20.7764	10.0628	0.00151291	0.0157757
Zfp811	2.14341	4.41805	3.88486	14.7727	10.0636	0.00151225	0.0157757
Mt2	3.44028	10.855	1.94483	3.84992	10.001	0.00156459	0.0161957
Lrrc1	2.91143	7.52363	2.51961	5.73427	9.99539	0.00156933	0.0162303
1810032O08Rik	2.00474	4.01316	4.29349	19.6096	9.98124	0.00158143	0.016341
Ppil6	2.89475	7.43715	2.30986	4.95835	9.96517	0.00159529	0.0164696
4930534B04Rik	2.02304	4.06439	3.56888	11.867	9.94571	0.00161225	0.0166151
6030422M02Rik	2.8912	7.41888	2.4149	5.33282	9.93332	0.00162313	0.0167125
Zfp787	2.59841	6.05619	3.31846	9.976	9.9034	0.00164974	0.0169427
2900026A02Rik	2.50712	5.68483	2.89175	7.42171	9.87579	0.00167468	0.0171825
Efcab1	2.51942	5.73353	3.06084	8.34459	9.8509	0.00169749	0.01734
Mro	2.04576	4.12891	4.02652	16.2969	9.82018	0.00172607	0.0175514
Cir1	2.64598	6.2592	3.49787	11.297	9.81599	0.00173001	0.0175643
Cpa2	2.5513	5.86161	3.23598	9.42163	9.79783	0.00174718	0.0176615
Ccdc126	6.20792	73.9212	2.49925	5.65391	9.79556	0.00174934	0.017668
Mbd2	2.16124	4.47298	3.96032	15.5659	9.77095	0.00177291	0.0178322
Slc24a6	2.91483	7.54141	2.4796	5.57741	9.72945	0.00181339	0.0181417
Gm16907	3.4249	10.7399	2.40733	5.30491	9.72186	0.00182089	0.0181855
Slc9a3r1	2.26209	4.79687	2.8926	7.42608	9.72314	0.00181962	0.0181855
Ccdc51	2.40704	5.30384	2.87316	7.32669	9.66499	0.00187812	0.0186291
Maff	2.82926	7.10707	2.47357	5.55417	9.64225	0.00190152	0.0188451
9430032N09Rik	2.01476	4.04112	3.43009	10.7786	9.62571	0.00191872	0.0189671
Ttc38	2.88207	7.37205	2.5619	5.90486	9.61906	0.00192569	0.0190037
Gmppb	2.22119	4.66278	3.5835	11.9879	9.61574	0.00192917	0.0190219
Ccnj	2.12036	4.34803	3.37862	10.4008	9.60176	0.00194391	0.0191348
Snip1	2.10116	4.29055	4.17055	18.0078	9.54538	0.00200454	0.0196485
Lzts1	2.08611	4.24603	3.24412	9.47496	9.47674	0.00208094	0.0202439
9530077C05Rik	2.04978	4.14044	3.41737	10.6839	9.39831	0.00217185	0.020988
Afmid	2.88477	7.38588	2.33003	5.02814	9.27211	0.0023267	0.0222807
Tst	2.82862	7.10396	2.15168	4.44344	9.26188	0.00233973	0.0223504
Avpr1a	2.42232	5.36031	2.49163	5.62412	9.26311	0.00233816	0.0223504
1700029F09Rik	2.25241	4.76477	3.00154	8.00852	9.2474	0.0023583	0.0225093
Ovgp1	2.56197	5.90515	2.63723	6.22137	9.23429	0.00237524	0.0226232
Cdkl4	2.55534	5.87807	2.45305	5.47572	9.21209	0.00240422	0.0228004
6530418L21Rik	2.05456	4.15417	3.81228	14.0478	9.2119	0.00240447	0.0228004
Sh3yl1	2.05372	4.15174	3.85605	14.4806	9.20711	0.00241076	0.0228228
AA960436	2.26901	4.81992	3.16652	8.97878	9.18802	0.00243605	0.0230247
Engase	2.39311	5.25288	3.28291	9.73315	9.17602	0.00245206	0.0231385
Wdr31	3.3187	9.97768	2.25755	4.78178	9.14518	0.00249375	0.0234368
Zfp239	2.0999	4.28679	3.27244	9.66282	9.13962	0.00250133	0.0234891
Slc13a3	2.81902	7.05681	2.00659	4.01831	9.13108	0.00251303	0.0235799
Cabp7	2.56753	5.92795	2.62142	6.15354	9.10938	0.00254302	0.0238037
Klhl25	2.01276	4.03552	3.61303	12.2358	9.08291	0.0025801	0.0241314
Efcab7	3.30688	9.89624	2.18139	4.5359	9.00177	0.00269718	0.0250652
Cpt1a	2.00151	4.00418	3.47916	11.1514	8.99308	0.00271004	0.0251247
Antxr2	2.43116	5.39326	3.42831	10.7652	8.93302	0.00280061	0.0257329
Acad11	2.22015	4.6594	4.46546	22.0921	8.93198	0.0028022	0.0257329
A230070E04Rik	2.28909	4.88748	2.8053	6.99003	8.90805	0.00283916	0.0259699
Mis12	2.29812	4.91816	3.12453	8.7212	8.9025	0.0028478	0.026008
Gapdhs	3.27971	9.71161	2.43287	5.39966	8.88344	0.00287769	0.0261731
Fbln1	2.09106	4.26062	3.46079	11.0103	8.88237	0.00287938	0.0261731
Zic1	2.38975	5.24067	2.76889	6.81583	8.85652	0.00292044	0.0264019
Fkbp7	2.75058	6.72986	2.33948	5.06119	8.835	0.00295508	0.0266324
Rad18	2.28343	4.86833	3.50788	11.3757	8.82786	0.00296667	0.0266954
Kcnj11	2.73191	6.64333	2.33904	5.05967	8.81762	0.00298335	0.0268041
Ccdc111	2.37674	5.19363	2.9545	7.75161	8.78742	0.00303316	0.0272087
Bbs12	3.26671	9.62451	2.5119	5.70371	8.77414	0.00305531	0.027324
Kif18a	2.25173	4.76252	4.31895	19.9588	8.75858	0.00308149	0.0274812
Mapk4	2.30342	4.93627	3.03623	8.20344	8.73557	0.00312061	0.0277799
Pamr1	2.74911	6.72303	2.14799	4.43208	8.70546	0.00317258	0.0281778
Nup35	2.34954	5.09663	2.98725	7.92963	8.69027	0.00319914	0.0283488
Cdc20	2.755	6.75055	2.78996	6.9161	8.6126	0.00333845	0.0292005
Zkscan4	2.72022	6.58972	2.23681	4.71355	8.60425	0.0033538	0.0292734
Rassf1	2.12889	4.37381	4.14213	17.6565	8.54063	0.00347306	0.0300886
9430038I01Rik	2.4836	5.5929	3.02989	8.16749	8.51196	0.0035282	0.0304756
Lyrm7	2.42843	5.38306	2.6477	6.26668	8.50129	0.00354894	0.0306093
Gstcd	2.69985	6.49736	3.05793	8.32774	8.48505	0.00358077	0.0308609
Mphosph6	2.24145	4.72872	3.14664	8.85589	8.41511	0.00372116	0.031765
Ier2	2.06035	4.17087	2.84832	7.20163	8.40592	0.00374001	0.0318558
Itpripl1	2.76267	6.7865	2.63769	6.22332	8.40421	0.00374354	0.0318625
Hsd11b1	2.17575	4.5182	3.11513	8.66457	8.40242	0.00374721	0.0318705
3110082I17Rik	2.40761	5.30593	2.59772	6.0533	8.38557	0.00378212	0.0320036
Spata6	6.10878	69.0121	3.04212	8.237	8.37506	0.00380405	0.0321424
F13a1	2.04904	4.13831	2.79524	6.94147	8.33641	0.00388584	0.0326674
Ell	2.03286	4.09215	3.75352	13.4872	8.3236	0.00391333	0.0326898
Igsf9	2.04932	4.1391	3.02649	8.14824	8.30197	0.00396021	0.0329593
Fam167a	3.18512	9.09527	2.1763	4.51993	8.28351	0.00400067	0.0332247
D2Ertd750e	2.11205	4.32306	3.37977	10.4091	8.24978	0.0040757	0.0337274
Cercam	2.38305	5.21639	2.98257	7.90392	8.23796	0.00410232	0.0338754
Zbtb8a	2.01457	4.0406	3.13202	8.76661	8.22937	0.00412177	0.0339925
Cfp	2.38729	5.23174	3.04355	8.24515	8.21222	0.00416091	0.034262
Cyb5d1	2.46189	5.50938	2.74569	6.70713	8.12295	0.00437083	0.035513
Ccdc61	2.08691	4.24836	3.16937	8.99655	8.12381	0.00436877	0.035513
Zfp433	2.03083	4.0864	3.10002	8.57432	8.12513	0.00436559	0.035513
Ube2h	2.02532	4.07081	3.84059	14.3262	8.10542	0.0044133	0.0357333
D630023F18Rik	2.66625	6.34777	2.77109	6.82624	8.09798	0.00443147	0.0358555
Lactb	2.10398	4.29894	3.42767	10.7605	8.04365	0.00456635	0.0366663
Serpinf1	2.3602	5.13443	2.76206	6.78363	8.00542	0.00466375	0.0372827
9830147E19Rik	2.19878	4.59091	2.87068	7.31411	8.00472	0.00466555	0.0372827
Xlr3b	2.64497	6.25484	2.44273	5.43668	7.97362	0.00474639	0.0377731
1700094D03Rik	2.01377	4.03835	2.85192	7.2196	7.94727	0.00481599	0.0382485
Pla2g6	2.03699	4.10388	3.52693	11.5269	7.92527	0.00487491	0.0386373
Lcp2	2.07053	4.2004	2.71832	6.58106	7.90852	0.00492025	0.0387853
Fam111a	2.1724	4.50774	2.90126	7.47077	7.90537	0.00492883	0.0388266
Ftsjd1	2.27382	4.836	3.07936	8.45241	7.90077	0.00494137	0.0388727
Cks1b	2.05975	4.16913	3.18859	9.11717	7.85044	0.00508082	0.0397816
Zfp708	2.64018	6.23409	2.39481	5.25906	7.83593	0.00512178	0.0400484
Depdc7	2.62256	6.15843	2.09419	4.26987	7.77746	0.00529022	0.0410384
Zfp213	2.32652	5.01592	2.60538	6.08554	7.77679	0.00529217	0.0410384
Hist1h4j	2.17526	4.51668	2.70174	6.50587	7.77182	0.00530676	0.041108
Ppifos	3.19868	9.18116	2.90321	7.4809	7.70419	0.00550929	0.0422827
Bcat2	2.00883	4.02456	3.57658	11.9305	7.68078	0.0055812	0.0426938
Rasgef1a	2.28818	4.88439	5.20784	36.9586	7.61956	0.00577385	0.0439077
Prdm10	2.12279	4.35536	3.32985	10.0551	7.58252	0.00589369	0.0446439
Tonsl	3.104	8.59798	3.41508	10.667	7.57888	0.00590562	0.0447052
AI987944	2.20793	4.62011	2.61773	6.13784	7.45452	0.00632774	0.0472853
Spata1	2.32911	5.02497	2.30304	4.93497	7.34934	0.00670875	0.0492469
Pcbd2	2.13184	4.38275	2.77551	6.84719	7.34629	0.00672011	0.0492681
Inhbb	2.09204	4.26351	2.70528	6.52187	7.32994	0.00678151	0.0496245

## Sheet: 1D VGAT enriched
	logFC	FC	logCPM	CPM	LR	PValue	FDR		Legend
Npy	-6.66359	0.00986418	7.35001	163.145	115.849	5.12941e-27	2.98403e-23		logFC	log2 fold-change (VGluT2+ cells compared to VGAT+ cells)
Gad2	-5.67719	0.0195432	9.57014	760.149	112.124	3.35721e-26	1.30204e-22		FC	fold-change (VGluT2+ cells compared to VGAT+ cells)
Neb	-5.91083	0.0166212	6.89437	118.963	107.098	4.23603e-25	1.23216e-21		logCPM	log2 counts per million
Nxph1	-5.86067	0.0172093	6.99977	127.979	105.651	8.79501e-25	2.0466e-21		CPM	counts per million
Grik1	-5.5888	0.020778	7.44156	173.834	100.356	1.27317e-23	2.4689e-20		LR	likelihood ratio
Crhbp	-8.26477	0.0032513	4.40372	21.1666	97.7567	4.73078e-23	7.86324e-20		Pvalue	Unadjusted p-value
Erbb4	-5.05141	0.030156	8.90956	480.888	93.4732	4.1173e-22	5.82874e-19		FDR	FDR corrected p-value
Adarb2	-5.15458	0.0280747	7.81953	225.898	93.2935	4.50869e-22	5.82874e-19
Sst	-5.59893	0.0206326	6.2871	78.092	92.1658	7.97098e-22	9.27423e-19
Igf1	-5.13779	0.0284035	7.07595	134.919	90.3594	1.98596e-21	2.10061e-18
Akr1c18	-9.00587	0.0019452	4.04059	16.4566	89.6218	2.88328e-21	2.79558e-18
Lhx6	-5.36114	0.0243297	6.30303	78.9586	85.8952	1.89727e-20	1.47165e-17
Grin2d	-5.32397	0.0249646	5.73813	53.3763	84.1517	4.58235e-20	3.33223e-17
Alk	-5.57601	0.020963	5.28841	39.0814	83.0301	8.08119e-20	5.53086e-17
Hapln1	-4.74406	0.0373161	8.50953	364.439	80.9826	2.27719e-19	1.39448e-16
Syt6	-6.14289	0.0141516	3.94629	15.4153	79.7194	4.31535e-19	2.51045e-16
Spock1	-4.85744	0.0344956	6.80921	112.144	79.5014	4.81876e-19	2.66982e-16
Wif1	-8.65021	0.00248902	3.78213	13.7573	78.6811	7.29912e-19	3.86024e-16
Gm5607	-5.08165	0.0295305	5.61261	48.9289	77.0955	1.62886e-18	8.23992e-16
Nhs	-5.62894	0.0202078	4.03823	16.4297	74.068	7.54729e-18	3.65886e-15
Dlx6as1	-4.39331	0.0475862	7.38126	166.717	69.1708	9.02931e-17	3.752e-14
Gm14204	-7.19864	0.00680761	3.3603	10.2696	68.8272	1.07483e-16	4.31228e-14
Slc32a1	-5.27023	0.025912	4.81502	28.1491	68.7395	1.1237e-16	4.35808e-14
Cspg4	-4.42896	0.0464249	6.2453	75.8618	68.0007	1.63439e-16	6.13424e-14
Ptprm	-4.22045	0.0536437	6.85568	115.815	67.0895	2.59463e-16	9.4339e-14
Dpp10	-4.45902	0.0454675	8.4978	361.487	66.5483	3.41417e-16	1.20375e-13
Cntnap3	-6.67001	0.00982037	6.21439	74.2536	65.1037	7.10568e-16	2.36213e-13
Tac1	-5.85123	0.0173222	6.7044	104.286	64.6089	9.13413e-16	2.9521e-13
Emid2	-4.47996	0.0448124	5.74659	53.6902	64.3608	1.03598e-15	3.25775e-13
Col19a1	-3.83831	0.0699121	9.0963	547.341	61.4928	4.44359e-15	1.261e-12
Vstm2a	-3.85742	0.0689923	8.30519	316.309	61.4129	4.62776e-15	1.282e-12
Dlx1	-4.36259	0.0486104	6.51349	91.3598	60.5077	7.32899e-15	1.98309e-12
Pde3a	-4.94605	0.0324407	4.15972	17.8731	60.3844	7.80305e-15	2.06337e-12
Pappa	-5.43777	0.0230711	3.95689	15.529	59.589	1.16889e-14	2.95654e-12
Nmbr	-5.09236	0.0293122	4.06365	16.7217	59.0947	1.5026e-14	3.69308e-12
Itga9	-4.07417	0.0593681	5.31026	39.6777	59.0675	1.52357e-14	3.69308e-12
Htr3a	-4.41646	0.0468289	5.3704	41.3667	58.9421	1.62377e-14	3.85562e-12
Slc6a1	-3.72297	0.0757313	10.445	1394.01	58.8434	1.70737e-14	3.97304e-12
Cux2	-4.47019	0.0451168	6.73631	106.618	57.1509	4.0363e-14	9.03122e-12
Ptprt	-3.73192	0.0752627	7.56909	189.9	57.0645	4.2175e-14	9.20661e-12
Gpr17	-4.31802	0.0501358	7.72745	211.932	57.0388	4.27294e-14	9.20661e-12
6330527O06Rik	-4.81861	0.0354368	4.80852	28.0227	56.4698	5.70695e-14	1.18572e-11
Sox10	-4.43915	0.0460979	5.08215	33.875	55.8553	7.80052e-14	1.59226e-11
Arx	-4.96651	0.031984	4.19811	18.3552	54.921	1.25471e-13	2.51518e-11
Dlx1as	-4.83903	0.0349388	6.47213	88.7778	54.8196	1.32114e-13	2.51518e-11
Myh8	-4.56462	0.0422583	5.90869	60.0747	54.8022	1.33293e-13	2.51518e-11
Unc5d	-4.33439	0.04957	6.918	120.927	54.7914	1.34028e-13	2.51518e-11
Bcas1	-3.66996	0.0785654	7.10223	137.399	54.048	1.95652e-13	3.61336e-11
Col25a1	-3.59065	0.0830052	8.34449	325.044	53.646	2.40077e-13	4.36452e-11
Pnoc	-4.57708	0.0418949	3.95591	15.5184	52.963	3.39899e-13	6.0842e-11
Gm98	-4.58952	0.0415353	4.04257	16.4792	52.9293	3.45779e-13	6.09566e-11
Kcnip1	-3.76379	0.0736181	6.95174	123.789	51.3391	7.77124e-13	1.31041e-10
Neu4	-3.76913	0.0733465	5.88407	59.0584	51.1407	8.59769e-13	1.42176e-10
Sytl5	-4.55894	0.0424251	3.53782	11.6142	51.1229	8.67599e-13	1.42176e-10
Sp9	-6.05818	0.0150074	3.27922	9.70833	50.9677	9.39006e-13	1.51741e-10
Shc4	-4.43111	0.0463557	4.09927	17.1397	50.7957	1.02496e-12	1.63362e-10
Mkx	-4.67628	0.0391109	3.87577	14.6799	50.3962	1.25638e-12	1.92343e-10
Elfn1	-4.17486	0.0553657	4.48689	22.4228	49.899	1.61865e-12	2.43406e-10
Adssl1	-4.62015	0.0406626	3.40546	10.5961	49.8832	1.63177e-12	2.43406e-10
Sox2ot	-3.65735	0.0792551	6.18272	72.6413	49.5015	1.98224e-12	2.88291e-10
Crh	-4.5763	0.0419175	3.99964	15.996	49.3754	2.11375e-12	3.03624e-10
S100a13	-3.58627	0.083258	6.0567	66.5653	48.3358	3.59127e-12	4.97434e-10
Zfp804b	-5.14189	0.0283228	3.74004	13.3618	48.3006	3.65642e-12	5.005e-10
Unc5c	-3.60157	0.0823794	7.57574	190.777	47.6849	5.00541e-12	6.77186e-10
Plekhh2	-3.87997	0.0679225	4.36239	20.5688	47.4175	5.73684e-12	7.6722e-10
Lims2	-3.86096	0.0688232	5.51351	45.6807	46.8586	7.62979e-12	1.00878e-09
Fam38b	-5.88855	0.0168799	3.31557	9.95602	46.6724	8.39009e-12	1.09219e-09
Cntnap5c	-3.51798	0.0872936	6.30954	79.316	46.6589	8.4484e-12	1.09219e-09
Cxcl14	-3.46078	0.090824	6.59453	96.6387	46.5384	8.9842e-12	1.14869e-09
Gria4	-3.26236	0.104216	8.24492	303.367	46.1271	1.10826e-11	1.40159e-09
Pla2g4e	-3.79181	0.0722023	4.95719	31.0644	45.6112	1.44215e-11	1.77689e-09
Calca	-5.84582	0.0173874	3.59281	12.0654	45.5994	1.45084e-11	1.77689e-09
Sncb	-3.4117	0.0939673	6.34258	81.1536	45.152	1.82319e-11	2.20967e-09
Npas3	-3.59712	0.0826338	6.03953	65.7777	44.83	2.1491e-11	2.5515e-09
Kcnc2	-3.41518	0.0937405	5.88764	59.2046	44.5678	2.45695e-11	2.88754e-09
Sox1	-4.14375	0.0565727	4.3232	20.0177	44.0247	3.24252e-11	3.68781e-09
Zfp618	-6.14797	0.0141018	3.39509	10.5202	44.0114	3.26467e-11	3.68781e-09
Etl4	-3.48138	0.0895368	5.34827	40.737	43.4029	4.4553e-11	4.89032e-09
Gad1	-3.37362	0.0964807	9.81259	899.256	43.2976	4.70169e-11	5.11254e-09
AW551984	-3.13631	0.113731	7.55853	188.515	42.7537	6.20839e-11	6.68839e-09
Trp53i11	-3.66429	0.0788749	4.71058	26.1834	42.6779	6.45361e-11	6.88878e-09
Ace	-4.39894	0.0474008	4.05868	16.6642	42.3655	7.57125e-11	7.93617e-09
Htr7	-3.99508	0.0627134	4.27368	19.3423	42.1705	8.36504e-11	8.68993e-09
Zmat4	-3.44138	0.0920536	5.79701	55.5999	41.6533	1.0898e-10	1.11227e-08
Tns3	-3.15104	0.112575	7.2076	147.81	41.4342	1.21909e-10	1.2334e-08
Tmtc2	-3.46967	0.0902661	4.7118	26.2056	41.1552	1.40607e-10	1.41031e-08
Pdgfra	-3.06427	0.119553	9.31583	637.299	41.0663	1.47151e-10	1.46334e-08
Atp10b	-4.65651	0.0396507	4.03302	16.3704	40.9872	1.53231e-10	1.51088e-08
Snx8	-3.20995	0.108071	5.73943	53.4245	40.8789	1.61963e-10	1.58356e-08
Sp8	-4.74932	0.0371804	3.12067	8.69793	40.6891	1.78477e-10	1.70212e-08
Pld1	-3.3538	0.097815	4.88357	29.5189	40.2022	2.28991e-10	2.14864e-08
Lama3	-4.19562	0.054575	5.33748	40.4336	39.4297	3.40081e-10	3.11563e-08
Ptpn14	-4.10992	0.0579149	3.64933	12.5475	39.4042	3.44552e-10	3.13192e-08
Vwc2	-3.59993	0.082473	4.41244	21.2949	39.2073	3.81118e-10	3.43745e-08
Lhfpl3	-3.29367	0.101978	5.92742	60.8601	39.1902	3.84465e-10	3.44096e-08
Necab1	-3.00006	0.124995	6.77045	109.172	38.956	4.33465e-10	3.8499e-08
Rph3a	-2.98234	0.12654	8.3177	319.064	38.5329	5.38393e-10	4.64015e-08
Pitpnm3	-3.42817	0.0929008	4.54212	23.2978	38.174	6.47078e-10	5.53585e-08
2810468N07Rik	-3.64266	0.0800664	3.79032	13.8356	37.8806	7.52083e-10	6.34093e-08
Crispld1	-4.63779	0.0401684	5.1465	35.4201	37.5658	8.83814e-10	7.3512e-08
Nrxn3	-3.02562	0.1228	8.34334	324.785	37.5642	8.84544e-10	7.3512e-08
Btbd11	-3.44684	0.0917061	5.93755	61.2888	37.4779	9.24564e-10	7.6293e-08
Car10	-3.57839	0.083714	4.93197	30.526	37.4403	9.42535e-10	7.72281e-08
Sox8	-3.34698	0.0982787	4.64101	24.9507	37.3974	9.63509e-10	7.82656e-08
Rgs8	-3.37717	0.0962432	5.94042	61.4109	37.387	9.68651e-10	7.82656e-08
Sulf2	-3.09452	0.117073	7.60242	194.337	36.9622	1.20444e-09	9.53307e-08
Npas1	-3.20442	0.108486	6.1407	70.5562	36.9113	1.2363e-09	9.71916e-08
Ank1	-3.13768	0.113622	5.88743	59.196	36.8818	1.25515e-09	9.75077e-08
Kcnmb2	-3.52068	0.0871303	4.71197	26.2086	36.8788	1.25708e-09	9.75077e-08
Tmem132d	-3.42497	0.0931065	4.83899	28.6208	36.7922	1.31418e-09	1.01262e-07
Cpne5	-3.34396	0.0984844	5.23907	37.7675	36.3813	1.62256e-09	1.23389e-07
Maf	-3.22976	0.106597	5.67592	51.1236	36.3274	1.66804e-09	1.25577e-07
Cbln2	-2.97423	0.127253	6.27903	77.6561	36.3217	1.67291e-09	1.25577e-07
Enpp2	-4.3081	0.0504816	8.02995	261.37	36.0436	1.92954e-09	1.4209e-07
Sorcs1	-4.23834	0.0529825	6.06237	66.8274	35.9373	2.03765e-09	1.49108e-07
Rcan2	-2.93952	0.130352	5.82013	56.4981	35.8701	2.10918e-09	1.53377e-07
Stk32a	-4.14054	0.0566987	5.25645	38.2251	35.8225	2.16137e-09	1.56196e-07
Ugt8a	-3.33248	0.099271	5.99976	63.9893	35.6103	2.41014e-09	1.72036e-07
Lars2	-2.87161	0.136634	13.5385	11898.6	35.1808	3.00465e-09	2.11873e-07
Kcns3	-3.76934	0.0733359	3.65851	12.6276	35.0976	3.1359e-09	2.19796e-07
Klhl4	-3.22752	0.106762	4.07093	16.8063	34.5366	4.18302e-09	2.91434e-07
Megf11	-2.93512	0.130749	5.9332	61.1042	34.4238	4.4328e-09	3.03386e-07
Plcb4	-2.8854	0.135334	6.67157	101.939	33.9443	5.67121e-09	3.81413e-07
Grb10	-3.09293	0.117202	5.39739	42.148	33.6953	6.44548e-09	4.28532e-07
Gjd2	-3.13693	0.113681	4.72986	26.5356	33.6823	6.4887e-09	4.28954e-07
Adra1a	-3.295	0.101884	4.04595	16.5178	33.6684	6.53535e-09	4.29598e-07
Kif26a	-3.51269	0.0876144	4.0794	16.9052	32.9409	9.50037e-09	6.20993e-07
Epha10	-3.36712	0.0969162	3.9814	15.7951	32.5149	1.18281e-08	7.56154e-07
Sox6	-3.58135	0.0835421	6.29305	78.4148	32.3991	1.25547e-08	7.98219e-07
Rn45s	-2.76673	0.146937	16.0772	69137.9	31.9203	1.60634e-08	1.01575e-06
Pcsk6	-2.89837	0.134123	5.09147	34.0946	31.8194	1.69196e-08	1.05838e-06
A230077H06Rik	-3.18571	0.109902	3.81162	14.0415	31.7055	1.79409e-08	1.11033e-06
Ntn1	-3.29388	0.101963	4.0072	16.0801	31.6865	1.8118e-08	1.11536e-06
Rbms3	-2.91287	0.132782	5.4709	44.3511	31.4054	2.094e-08	1.27403e-06
A530058N18Rik	-4.63859	0.0401463	3.61153	12.223	31.1479	2.39092e-08	1.43394e-06
Cnr1	-2.57356	0.167989	9.21455	594.096	31.0889	2.46478e-08	1.47065e-06
Elavl2	-2.79717	0.143869	6.76312	108.618	31.0685	2.49078e-08	1.47859e-06
Itpr2	-2.68892	0.15508	7.61551	196.109	30.9718	2.61802e-08	1.54622e-06
Qpct	-2.66536	0.157633	6.99996	127.996	30.9108	2.70164e-08	1.58756e-06
Bend4	-2.78247	0.145342	5.39739	42.148	30.7664	2.91032e-08	1.70158e-06
Hmcn1	-3.0699	0.119088	3.80216	13.9497	30.7457	2.94155e-08	1.71125e-06
Mctp2	-4.44568	0.0458899	4.12879	17.494	30.4787	3.37556e-08	1.95396e-06
Endod1	-2.801	0.143488	5.26668	38.4971	30.3743	3.56222e-08	2.0417e-06
Myo3b	-3.24773	0.105278	4.65463	25.1874	30.2739	3.75139e-08	2.11881e-06
Sv2c	-2.65758	0.158486	6.50057	90.5456	30.1919	3.91332e-08	2.17854e-06
Enpp6	-3.0962	0.116937	5.97048	62.7036	30.1098	4.08268e-08	2.262e-06
Neto1	-3.15364	0.112373	6.34532	81.3078	30.0479	4.21513e-08	2.32432e-06
Pllp	-2.95345	0.129099	5.88555	59.1188	29.9213	4.4994e-08	2.45042e-06
Cit	-3.46949	0.0902776	6.33811	80.9023	29.851	4.66566e-08	2.52488e-06
Ret	-3.61977	0.0813466	3.84431	14.3633	29.7309	4.96366e-08	2.67371e-06
Scn7a	-3.86293	0.0687293	3.7528	13.4805	29.3815	5.94409e-08	3.18707e-06
C1ql1	-4.04397	0.0606237	4.00841	16.0936	29.3221	6.12918e-08	3.2563e-06
Moxd1	-3.29926	0.101584	3.03443	8.1932	29.2108	6.49168e-08	3.43321e-06
Vcan	-2.58027	0.16721	7.51577	183.009	29.1976	6.53615e-08	3.44109e-06
Ell2	-2.77019	0.146585	4.55101	23.4418	29.16	6.66392e-08	3.49256e-06
Spry4	-3.05214	0.120563	4.1797	18.1224	29.1224	6.79456e-08	3.54505e-06
Gabrg3	-2.79862	0.143725	5.42466	42.9522	28.869	7.74441e-08	4.0226e-06
Rxfp3	-2.96183	0.128351	4.07328	16.8338	28.638	8.72541e-08	4.49204e-06
Sema3d	-3.65607	0.0793256	5.78275	55.053	28.5901	8.94383e-08	4.58421e-06
Nos1	-2.55285	0.170418	6.2337	75.2544	28.3784	9.97737e-08	5.09152e-06
Rasgrf2	-2.82675	0.140949	5.79879	55.6686	27.92	1.26433e-07	6.39586e-06
Pcdh11x	-2.7112	0.152703	5.35801	41.013	27.9107	1.27042e-07	6.39887e-06
Kcnc1	-2.63403	0.161093	5.57021	47.5117	27.8575	1.30588e-07	6.52684e-06
Ets1	-2.92883	0.131321	5.11817	34.7315	27.7776	1.36095e-07	6.73815e-06
Arhgap31	-3.08801	0.117603	5.2668	38.5004	27.7434	1.38517e-07	6.80018e-06
Grid2	-2.58904	0.166196	5.61794	49.1097	27.5015	1.56976e-07	7.53514e-06
Olig1	-2.63906	0.160532	5.5972	48.409	27.4966	1.57373e-07	7.53514e-06
9530091C08Rik	-3.27929	0.102999	3.00101	8.00561	27.4829	1.58489e-07	7.55745e-06
Cobl	-3.42971	0.0928011	3.67738	12.7939	27.1853	1.84861e-07	8.74333e-06
Spats2l	-2.5072	0.175896	6.11403	69.264	27.1384	1.89399e-07	8.8857e-06
Tle2	-2.75266	0.148377	4.51945	22.9345	26.8634	2.18355e-07	1.00816e-05
Zfp488	-3.13872	0.113541	3.49042	11.2388	26.7303	2.33925e-07	1.06734e-05
Abat	-2.38963	0.190831	8.05636	266.199	26.6576	2.4289e-07	1.10392e-05
Grm8	-3.04741	0.120959	3.99408	15.9345	26.6091	2.49065e-07	1.12758e-05
BC017158	-2.78525	0.145063	4.57103	23.7693	26.5064	2.62673e-07	1.17546e-05
Pacrgl	-2.69006	0.154957	4.08897	17.0177	26.4091	2.76229e-07	1.22669e-05
Gfpt2	-2.85091	0.138608	5.38802	41.8752	26.2833	2.94829e-07	1.29447e-05
Adamts15	-3.5489	0.0854425	3.17488	9.03095	26.1811	3.10857e-07	1.34454e-05
Caskin2	-2.76379	0.147236	4.49692	22.5792	26.0831	3.27034e-07	1.39679e-05
Slc5a7	-3.58548	0.0833036	3.7069	13.0583	25.6127	4.1729e-07	1.74646e-05
Tll1	-3.43752	0.0923001	5.30836	39.6257	25.4669	4.50043e-07	1.87679e-05
Gltp	-2.57329	0.16802	5.01215	32.2706	25.3918	4.67912e-07	1.94434e-05
Lnx1	-2.70344	0.153527	5.37669	41.5475	25.3346	4.81978e-07	1.99335e-05
Pmepa1	-2.93692	0.130586	3.17005	9.00076	25.1954	5.18045e-07	2.1075e-05
Trhde	-2.46941	0.180565	5.48882	44.9056	25.1431	5.32288e-07	2.1579e-05
Slc17a8	-3.34708	0.0982719	4.29739	19.6627	25.1285	5.36339e-07	2.15928e-05
Rgs10	-2.49053	0.177941	7.09733	136.933	25.0557	5.56978e-07	2.23463e-05
Mpzl1	-2.5555	0.170105	5.17914	36.2308	25.0482	5.59135e-07	2.23558e-05
Zfp385a	-3.01451	0.123749	3.18353	9.0853	24.9693	5.82512e-07	2.31383e-05
Cdh13	-2.47829	0.179457	6.52281	91.9519	24.9289	5.94826e-07	2.34975e-05
Mme	-2.65703	0.158545	5.09756	34.2389	24.8803	6.10017e-07	2.39324e-05
Sntg1	-2.44719	0.183368	6.48061	89.3015	24.8775	6.10909e-07	2.39324e-05
Samd4	-2.9979	0.125182	4.55823	23.5594	24.8639	6.15236e-07	2.4021e-05
Kank1	-3.18329	0.110087	5.67972	51.2585	24.8507	6.1945e-07	2.41047e-05
Sqrdl	-2.93652	0.130623	3.41653	10.6777	24.8293	6.26378e-07	2.42123e-05
Igfbp3	-2.79646	0.14394	4.39588	21.0519	24.7916	6.38768e-07	2.45283e-05
Cnp	-2.33748	0.197856	7.26255	153.548	24.6996	6.69974e-07	2.54743e-05
Bmp4	-3.69743	0.0770837	3.31159	9.92859	24.5748	7.14801e-07	2.69267e-05
Dusp26	-2.71992	0.151783	6.08178	67.7328	24.574	7.15115e-07	2.69267e-05
Plp1	-2.31205	0.201374	7.98461	253.284	24.396	7.84321e-07	2.91552e-05
Snhg11	-2.45227	0.182723	9.06514	535.647	24.3798	7.90943e-07	2.93077e-05
Dnm3	-2.45635	0.182207	7.86766	233.562	24.1655	8.84028e-07	3.25158e-05
3110082D06Rik	-2.65866	0.158367	4.78841	27.6348	24.1449	8.93505e-07	3.25891e-05
Galnt13	-2.50396	0.176292	5.40588	42.3968	24.1324	8.99328e-07	3.2699e-05
Arhgap18	-2.47702	0.179615	4.46638	22.1063	24.0899	9.19433e-07	3.33258e-05
Pde11a	-5.13133	0.028531	5.25127	38.0881	23.7671	1.08723e-06	3.88035e-05
Pcdh18	-2.70366	0.153503	4.8322	28.4864	23.7591	1.09177e-06	3.88462e-05
Epb4.1l4b	-3.78889	0.0723486	3.34709	10.176	23.7379	1.10385e-06	3.91564e-05
Sema6a	-2.29393	0.203919	6.64686	100.208	23.5618	1.20965e-06	4.27789e-05
Grpr	-3.69972	0.0769617	3.42287	10.7247	23.5056	1.24549e-06	4.36485e-05
Grip1	-2.25577	0.209385	7.31936	159.716	23.3924	1.32098e-06	4.60169e-05
Odz1	-2.21757	0.215003	8.1312	280.372	23.3826	1.32776e-06	4.61148e-05
Cdk14	-2.23913	0.211815	7.45768	175.787	23.1731	1.48054e-06	5.0665e-05
Ptprd	-2.21174	0.215873	9.21007	592.252	23.1066	1.53262e-06	5.22935e-05
9630013A20Rik	-2.51294	0.175198	4.56342	23.6443	23.0761	1.55717e-06	5.29755e-05
Hs3st1	-2.94121	0.130199	3.53904	11.6241	23.0698	1.56228e-06	5.29947e-05
Cntnap4	-2.43771	0.184577	7.76771	217.929	22.9797	1.63725e-06	5.53762e-05
Mag	-2.39103	0.190646	5.3862	41.8223	22.9114	1.69646e-06	5.70472e-05
Hcn2	-2.3906	0.190702	4.77518	27.3825	22.8205	1.77855e-06	5.94638e-05
Wls	-2.79766	0.143821	6.52143	91.8641	22.7739	1.82225e-06	6.07505e-05
Igsf21	-2.56283	0.169244	4.01333	16.1485	22.6724	1.92111e-06	6.36814e-05
Slc29a2	-2.81781	0.141825	3.51744	11.4513	22.6592	1.93431e-06	6.39367e-05
Gys1	-2.50354	0.176344	3.71996	13.1771	22.5505	2.04693e-06	6.7277e-05
Mamld1	-2.98197	0.126572	3.19928	9.18499	22.5378	2.06047e-06	6.75311e-05
Tmem130	-2.19856	0.217855	7.43381	172.902	22.5278	2.07124e-06	6.76936e-05
Fam5c	-3.04102	0.121496	6.25784	76.5237	22.4935	2.10853e-06	6.8719e-05
G0s2	-4.49662	0.0442979	3.67566	12.7786	22.426	2.18402e-06	7.03908e-05
Rab3b	-2.28662	0.204954	5.90887	60.0822	22.3402	2.28375e-06	7.34018e-05
Pbx3	-2.8086	0.142734	4.02668	16.2987	22.1964	2.4613e-06	7.80306e-05
Man2a1	-2.45688	0.18214	5.54177	46.5843	22.1071	2.5786e-06	8.13061e-05
Frmpd4	-2.22575	0.213788	6.69482	103.596	22.0418	2.66774e-06	8.36636e-05
AI504432	-2.34832	0.196374	5.36495	41.2109	22.0026	2.72284e-06	8.49335e-05
6330439K17Rik	-2.42755	0.18588	6.64373	99.9914	21.7911	3.04008e-06	9.30824e-05
Ttll11	-2.74577	0.149087	3.14378	8.83839	21.7596	3.09038e-06	9.41272e-05
Slc9a5	-2.42255	0.186526	4.30046	19.7046	21.7062	3.17762e-06	9.62804e-05
Kctd12	-2.14888	0.225487	7.50169	181.232	21.6867	3.21017e-06	9.70139e-05
Ampd3	-2.58397	0.166782	3.2591	9.57383	21.5723	3.40731e-06	0.000102175
Olig2	-2.4847	0.178662	5.0367	32.8244	21.5266	3.48954e-06	0.000103838
Esrrg	-2.96428	0.128133	3.69952	12.9917	21.5154	3.51004e-06	0.000103992
Zfp941	-2.5239	0.173872	4.43497	21.6301	21.5064	3.52656e-06	0.000104141
B130024G19Rik	-3.78164	0.0727132	3.29758	9.83267	21.4468	3.63786e-06	0.000107156
Fgd3	-2.27709	0.206313	5.6674	50.8228	21.3981	3.73133e-06	0.000109355
Vwa5b2	-2.38942	0.190859	5.07046	33.6017	21.3845	3.758e-06	0.000109585
Gjc3	-3.87139	0.0683275	3.98021	15.782	21.3572	3.81179e-06	0.000110875
Spock3	-2.12427	0.229367	7.54947	187.334	21.317	3.89264e-06	0.000112945
Mmp15	-2.39351	0.190318	5.59799	48.4355	21.2477	4.036e-06	0.000116523
Mfsd2a	-2.8244	0.141179	6.04	65.7995	21.1891	4.16132e-06	0.000119548
Fgf9	-2.50054	0.176711	4.22709	18.7275	21.0789	4.40752e-06	0.000125069
Pgf	-3.03602	0.121918	3.38952	10.4797	20.9108	4.81183e-06	0.000135231
Cpeb2	-2.16638	0.222769	6.5545	93.994	20.8049	5.08531e-06	0.000141889
Abcc4	-3.01223	0.123945	3.20762	9.23825	20.7731	5.17031e-06	0.000143915
Cyp2j6	-2.22944	0.213241	5.42981	43.1057	20.5432	5.82993e-06	0.000161119
Cdh18	-3.81016	0.07129	3.49624	11.2843	20.4848	6.01052e-06	0.000165716
Rnf152	-2.34424	0.196931	5.21941	37.2563	20.4702	6.0567e-06	0.000166202
Tmem145	-2.33888	0.197664	6.42369	85.8466	20.4256	6.19947e-06	0.000169289
Asap1	-2.25788	0.209079	6.46209	88.1625	20.4215	6.21285e-06	0.000169289
Sgcd	-2.91817	0.132295	3.47956	11.1546	20.3203	6.55009e-06	0.000177646
Gabbr2	-2.08145	0.236277	7.89351	237.784	20.2955	6.63578e-06	0.000179552
Ubash3b	-2.43329	0.185143	6.31918	79.8479	20.2473	6.80504e-06	0.000182608
Sdk1	-2.28228	0.205572	5.26691	38.5033	20.2455	6.81152e-06	0.000182608
Sirt2	-2.07413	0.237478	7.61118	195.521	20.1725	7.07618e-06	0.000188401
Tmem63a	-2.66653	0.157505	3.18055	9.06653	20.1296	7.23689e-06	0.00019224
Kazn	-2.1465	0.22586	5.48879	44.9046	20.0945	7.37073e-06	0.00019535
Pde5a	-2.24693	0.210672	5.72566	52.9172	20.0861	7.40318e-06	0.000195764
Rps6ka3	-2.1538	0.22472	5.77053	54.5886	20.0653	7.48427e-06	0.000197459
9430031J16Rik	-2.23653	0.212195	6.98612	126.774	20.0213	7.65853e-06	0.000201145
Tmem132b	-2.05664	0.240375	7.20965	148.021	19.943	7.97852e-06	0.000209077
Tcerg1l	-3.01115	0.124037	3.7253	13.226	19.9199	8.07551e-06	0.000211143
Pdxk	-2.19115	0.218977	6.45441	87.6944	19.8555	8.35212e-06	0.000217345
Thbs1	-2.15926	0.223871	5.85679	57.952	19.8488	8.38147e-06	0.000217345
Plxnb3	-2.59742	0.165234	5.65661	50.4439	19.827	8.47754e-06	0.000219191
Samhd1	-2.52074	0.174254	4.43194	21.5848	19.6913	9.1016e-06	0.000234286
Mgll	-2.09761	0.233645	7.14851	141.878	19.6126	9.48393e-06	0.000243052
Thrb	-2.17837	0.220924	5.1631	35.8301	19.5333	9.88597e-06	0.000252244
Rora	-2.4985	0.176961	4.50124	22.6468	19.41	1.05453e-05	0.00026669
Trpc6	-2.22395	0.214055	5.48642	44.8307	19.2791	1.12933e-05	0.000283185
Lgals1	-2.51568	0.174865	5.36407	41.1856	19.1558	1.2047e-05	0.000299503
Matn4	-2.21564	0.215291	5.6763	51.1372	19.0971	1.24232e-05	0.000306888
Nr2f2	-2.35925	0.194893	4.56505	23.671	19.0494	1.27381e-05	0.000313336
Arhgap26	-2.02173	0.246263	6.33887	80.9451	18.9287	1.35695e-05	0.000330295
5730559C18Rik	-2.67778	0.156282	3.31598	9.95887	18.8687	1.40029e-05	0.000339424
Slc7a1	-2.13627	0.227467	5.33537	40.3745	18.7197	1.51411e-05	0.000362483
Chrna4	-2.56274	0.169254	4.08727	16.9978	18.6772	1.5482e-05	0.000368637
Ppfia4	-2.0752	0.237303	7.02402	130.149	18.6575	1.56432e-05	0.000369936
Gm5567	-2.11851	0.230285	5.21105	37.0409	18.6045	1.60844e-05	0.000378064
Gabra3	-2.50467	0.176205	6.07034	67.1977	18.4383	1.75495e-05	0.000407561
Kirrel3	-2.34458	0.196885	5.18827	36.4606	18.3064	1.88073e-05	0.000429909
Sdk2	-2.26524	0.208015	4.42495	21.4804	18.2097	1.97865e-05	0.000448765
Chchd10	-2.35535	0.195419	4.16939	17.9933	18.1798	2.00997e-05	0.000454098
Rgs12	-2.22793	0.213465	6.95918	124.429	18.1435	2.04866e-05	0.00046194
Whrn	-2.71953	0.151823	3.15895	8.93179	18.126	2.0676e-05	0.000465311
Cntfr	-2.32979	0.198913	4.43199	21.5854	17.9984	2.21091e-05	0.000491852
Smoc1	-2.96295	0.128251	4.19357	18.2974	17.985	2.22652e-05	0.000494057
Cacna1i	-2.37166	0.193223	4.34302	20.2946	17.933	2.28823e-05	0.000502332
Afap1l2	-2.08657	0.23544	5.22916	37.5089	17.7612	2.50433e-05	0.000542605
Sars2	-2.12745	0.228862	4.70057	26.0023	17.7511	2.5177e-05	0.000543632
Ddc	-3.00202	0.124825	3.03778	8.21229	17.6516	2.65294e-05	0.000568452
Rassf5	-2.34557	0.19675	3.79597	13.8899	17.4876	2.89191e-05	0.000609553
Cyp46a1	-2.15199	0.225002	6.37121	82.78	17.4724	2.91516e-05	0.000613344
Csmd3	-2.00917	0.248415	8.17742	289.5	17.4682	2.92151e-05	0.00061357
Slc40a1	-2.40344	0.189013	3.72372	13.2115	17.4476	2.95341e-05	0.000618038
Nap1l5	-2.23256	0.21278	5.98244	63.2258	17.4366	2.97053e-05	0.000620505
Timp3	-2.02737	0.245302	5.29679	39.309	17.3907	3.04306e-05	0.000633075
Taf3	-3.16571	0.111437	3.09401	8.53863	17.3411	3.12355e-05	0.000644371
Zyx	-2.64051	0.160372	3.21825	9.3066	17.3198	3.15882e-05	0.000650493
Lama1	-2.41258	0.18782	4.11989	17.3865	17.216	3.33621e-05	0.000683394
Cntnap1	-2.11402	0.231003	4.28165	19.4494	17.1737	3.41118e-05	0.000696301
2010317E24Rik	-2.4073	0.188508	3.95884	15.5499	16.9924	3.75294e-05	0.000751556
Vip	-2.53957	0.171995	6.49936	90.4692	16.9588	3.81997e-05	0.000763289
1300014I06Rik	-2.09871	0.233467	4.73517	26.6335	16.9224	3.8939e-05	0.000770189
Morc4	-2.06771	0.238538	4.39301	21.0101	16.8347	4.07804e-05	0.000796106
Eci1	-2.00092	0.249841	4.51114	22.8028	16.6084	4.59481e-05	0.00088805
Manba	-2.62222	0.162417	4.11752	17.3579	16.5305	4.78734e-05	0.000917639
Scn1a	-2.03227	0.24447	7.33621	161.592	16.4675	4.94907e-05	0.000947079
Rims3	-2.17702	0.221132	4.37478	20.7463	16.3729	5.20231e-05	0.000987421
Gpr123	-2.63835	0.160612	4.16181	17.899	16.3552	5.25109e-05	0.000995057
Arhgap24	-2.54765	0.171034	4.2808	19.4379	16.3263	5.33175e-05	0.00100847
Apbb1ip	-2.35337	0.195688	3.24183	9.45993	16.3237	5.33924e-05	0.00100847
Vstm2b	-2.92346	0.131811	5.10849	34.4991	16.3008	5.40417e-05	0.00101579
Crlf2	-2.19966	0.217688	3.47408	11.1122	16.2347	5.59601e-05	0.00104846
Dlc1	-2.01384	0.247614	5.38249	41.715	16.2187	5.6434e-05	0.00105564
Diap3	-2.16055	0.223671	3.42322	10.7274	16.1765	5.77062e-05	0.00107041
Rnf144b	-2.72932	0.150797	3.54949	11.7086	16.0414	6.19734e-05	0.00114454
Cry1	-2.16308	0.223279	4.60457	24.3285	15.9985	6.33926e-05	0.00116382
Prickle1	-2.18719	0.219578	4.08959	17.0251	15.9048	6.66096e-05	0.00121856
Pon3	-2.49032	0.177967	2.57614	5.96341	15.8893	6.71587e-05	0.00122667
Nqo2	-2.42476	0.18624	3.45769	10.9867	15.8568	6.83213e-05	0.001244
Fyb	-2.23256	0.21278	3.60265	12.148	15.7564	7.20437e-05	0.00130565
Col11a2	-2.20193	0.217347	7.33253	161.18	15.7243	7.32766e-05	0.00132387
Adamts16	-2.13362	0.227885	3.95599	15.5193	15.6976	7.43181e-05	0.00133853
Cacng3	-2.68564	0.155432	2.83979	7.15918	15.684	7.4854e-05	0.0013461
Prkcq	-4.38883	0.0477344	5.95829	62.1763	15.6296	7.70402e-05	0.00137902
Scn9a	-2.07219	0.237797	4.33618	20.1986	15.6114	7.77842e-05	0.00138807
Phyhipl	-2.01278	0.247796	5.72955	53.0597	15.5361	8.09438e-05	0.00143128
Rxra	-2.14489	0.226112	4.3796	20.8157	15.4863	8.31043e-05	0.00146281
Tmem22	-2.32373	0.199751	3.09878	8.56696	15.436	8.53486e-05	0.00149553
Cdh24	-2.28048	0.20583	3.35805	10.2535	15.4287	8.56775e-05	0.00149903
Mcam	-2.24576	0.210843	3.17703	9.04441	15.3898	8.74591e-05	0.00152357
Ssh1	-2.02084	0.246415	4.342	20.2801	15.3184	9.08264e-05	0.00157257
Taf9b	-2.1699	0.222226	3.76133	13.5604	15.2279	9.52872e-05	0.00163279
Gab1	-2.17789	0.220999	3.53983	11.6304	15.2026	9.65726e-05	0.00164996
Cacng2	-2.22694	0.213611	4.16099	17.8889	15.0267	0.000106	0.0017926
Cdh20	-3.24446	0.105516	4.94332	30.7672	15.0101	0.000106936	0.00180319
Edaradd	-3.07262	0.118864	3.6903	12.909	14.9264	0.000111789	0.0018661
B3galtl	-2.79481	0.144105	5.21335	37.1002	14.8949	0.000113669	0.00189205
Plekhn1	-2.36425	0.194218	2.98914	7.94002	14.7076	0.000125539	0.0020526
A230057D06Rik	-2.01279	0.247794	4.79183	27.7002	14.4691	0.000142479	0.00229062
Baiap3	-2.23457	0.212484	3.49931	11.3083	14.296	0.000156197	0.00246253
Fam40b	-2.12978	0.228493	4.64695	25.0536	14.2864	0.000156998	0.00247161
Jdp2	-2.26344	0.208275	3.89285	14.8548	13.9126	0.00019151	0.00292034
Lgi3	-2.03652	0.243751	4.3642	20.5947	13.9015	0.000192642	0.00293375
Omg	-2.09098	0.234722	3.89018	14.8272	13.7887	0.000204561	0.003091
Timp4	-2.15076	0.225194	4.81836	28.2143	13.7265	0.00021145	0.00318269
Lancl3	-2.29598	0.20363	4.10934	17.2598	13.7013	0.000214309	0.003205
Ankrd39	-2.21635	0.215185	3.099	8.56824	13.6831	0.000216398	0.00322381
Nfkbib	-2.40041	0.189411	3.00801	8.04453	13.4187	0.000249133	0.00362332
D8Ertd82e	-2.05728	0.240269	3.19834	9.17902	13.2878	0.000267145	0.00385637
Lgi2	-2.03712	0.24365	5.29293	39.2039	13.2035	0.000279426	0.00401373
Anp32b	-2.0555	0.240566	3.81313	14.0562	13.0798	0.000298504	0.0042772
Papln	-2.52556	0.173673	3.05469	8.30907	13.0437	0.000304301	0.00433359
Cacng4	-2.01246	0.247851	5.03139	32.7039	12.9931	0.000312646	0.00442535
Rgs3	-2.27996	0.205903	2.88366	7.38018	12.9624	0.000317816	0.00448217
A930003O13Rik	-2.42895	0.185701	3.46517	11.0439	12.9167	0.000325659	0.00455414
Fbxo16	-2.31519	0.200936	3.0917	8.52499	12.7604	0.000354044	0.00490393
Cpne7	-2.45389	0.182518	6.72151	105.53	12.6233	0.000380958	0.00522695
Gpc6	-2.45542	0.182325	3.96627	15.6303	12.6185	0.000381949	0.00523436
Trim62	-2.50357	0.17634	3.38261	10.4296	12.4001	0.000429318	0.00578138
Atf1	-2.15606	0.224368	2.89146	7.42021	12.3624	0.000438071	0.00587206
Pcdha6	-2.11815	0.230342	3.29149	9.79125	11.7888	0.000595878	0.0075771
Tmem132e	-2.27167	0.20709	4.28982	19.5598	11.7654	0.00060343	0.00763972
Mafb	-2.13011	0.22844	3.30954	9.9145	11.4365	0.000720145	0.00888536
Gm15350	-2.0819	0.236204	2.95741	7.76726	11.4323	0.000721769	0.00889596
Dleu7	-2.53715	0.172283	3.45929	10.9989	11.3882	0.000739122	0.00906184
Grm4	-2.34975	0.19618	3.70338	13.0265	11.2676	0.000788734	0.00957924
Thbs2	-2.03482	0.244039	2.91237	7.52853	11.1404	0.000844659	0.0100772
Scube1	-2.53665	0.172342	3.85005	14.4205	11.0909	0.00086752	0.0102786
Mtm1	-2.01562	0.247307	4.52884	23.0843	10.9666	0.000927672	0.0108586
Scel	-2.34887	0.1963	3.34365	10.1517	10.8106	0.00100921	0.0116259
Capn6	-2.4125	0.18783	2.74682	6.71237	10.7961	0.00101714	0.0117053
Nr2e1	-2.0245	0.245791	3.41289	10.6508	10.5999	0.00113095	0.0126468
Fam131c	-2.69471	0.154459	4.46145	22.0308	10.5568	0.00115759	0.0128516
Scml4	-2.27488	0.20663	3.91484	15.0828	10.4594	0.00122029	0.0133818
Rims4	-2.04968	0.241537	3.8236	14.1586	10.3495	0.00129512	0.0140044
Gabrd	-2.55307	0.170393	5.03495	32.7846	10.3199	0.00131603	0.0141778
Zfp105	-2.00032	0.249945	3.37438	10.3703	10.2245	0.00138584	0.014712
Dusp10	-2.15378	0.224723	2.89799	7.45388	10.0641	0.00151188	0.0157757
Rltpr	-2.13854	0.22711	3.01544	8.08609	9.74727	0.00179589	0.0179821
Tfr2	-2.01239	0.247861	3.31941	9.98257	9.62836	0.00191596	0.0189559
Egln3	-2.12166	0.229783	3.55917	11.7874	8.89292	0.00286278	0.0260873
Slc9a1	-2.29192	0.204203	3.76189	13.5657	8.64021	0.00328824	0.0288963
Tmem196	-2.04913	0.241629	4.38304	20.8654	7.91062	0.00491455	0.0387696
Pgcp	-2.79301	0.144284	4.18303	18.1643	7.75424	0.00535866	0.0413723
Pvrl4	-2.08546	0.235622	2.99135	7.95218	7.37924	0.00659812	0.0487423
